# Supplementary material for: Synthesis and spectral properties of 6′-triazolyl-dihydroxanthene-hemicyanine fused near-infrared dyes
Source: Royal Society of Chemistry journal article supplement (doi:10.1039/d0nj01724h), 2020-01-01

# Synthesis and Spectral Properties of 6'-Triazolyl-Dihydroxanthene-Hemicyanine Fused Near-Infrared Dyes

Gu Lingyue,<sup>a</sup> Kevin Renault,<sup>b</sup> Anthony Romieu,<sup>\*b</sup> Jean-Alexandre Richard<sup>\*c</sup> and Rajavel Srinivasan<sup>\*a</sup>

<sup>a</sup> School of Pharmaceutical Science and Technology (SPST), Tianjin University, Building 24, 92 Weijin Road, Nankai District, Tianjin, 300072 P. R. China

E-mail: [rajavel@tju.edu.cn](mailto:rajavel@tju.edu.cn)

<sup>b</sup> ICMUB, UMR 6302, CNRS, Univ. Bourgogne Franche-Comté - 9, Avenue Alain Savary, 21000 Dijon, France

E-mail: [anthony.romieu@u-bourgogne.fr](mailto:anthony.romieu@u-bourgogne.fr)

<sup>c</sup> Functional Molecules and Polymers, Institute of Chemical and Engineering Sciences (ICES), Agency for Science, Technology and Research (A\*STAR) - 8 Biomedical Grove, Neuros, #07-01, Singapore 138665

E-mail: [jean\\_alexandre@ices.a-star.edu.sg](mailto:jean_alexandre@ices.a-star.edu.sg)

## Supporting Information

## Table of contents

|                                                                                                                                        |            |
|----------------------------------------------------------------------------------------------------------------------------------------|------------|
| <b>1. General.....</b>                                                                                                                 | <b>S3</b>  |
| <b>2. Instruments and methods .....</b>                                                                                                | <b>S3</b>  |
| <b>3. Synthesized compounds .....</b>                                                                                                  | <b>S4</b>  |
| <b>3.1 Preparation of alkynyl-based DHX-hemicyanine fused dyes 1.. .....</b>                                                           | <b>S4</b>  |
| <b>3.2 Preparation of organic azides 11a-11o.....</b>                                                                                  | <b>S7</b>  |
| <b>3.3 General procedure for the CuAAC reaction.....</b>                                                                               | <b>S12</b> |
| <b>4. References.....</b>                                                                                                              | <b>S22</b> |
| <b>5. <math>^1\text{H}</math>, <math>^{19}\text{F}</math> and <math>^{13}\text{C}</math> NMR spectra of synthesized compounds.....</b> | <b>S22</b> |
| <b>6. RP-HPLC analyses of triazole-based DHX-hemicyanine fused dyes.....</b>                                                           | <b>S45</b> |
| <b>7. Photophysical data of DHX-hemicyanine fused dyes (alkyne and triazole derivatives).....</b>                                      | <b>S65</b> |
| <b>8. HRMS data of DHX-hemicyanine fused dyes (alkyne and triazole derivatives).....</b>                                               | <b>S81</b> |

## 1. General

Chemicals, reagents and solvents were purchased from commercial vendors and used without further purification. Triethylamine, dichloromethane (DCM), dimethylformamide (DMF), ethyl acetate (EtOAc), petroleum ether (PE, b.p. 60-90 °C), acetonitrile (MeCN), methanol (MeOH) and ethanol (EtOH) used in this work were reagent grade and purchased from Concord Technology, China. Thin-layer chromatography (TLC) was carried on pre-coated glass plates with 0.2 mm silica gel (local vendor, China) and visualized under UV (254 nm) and/or potassium permanganate (KMnO<sub>4</sub>) stain. Flash-column chromatography was performed using regular silica gel 60 (200-300 mesh, 50-74 μm) provided by commercial vendors in China with specified eluents. Solvents used for photophysical characterizations: chloroform (CHCl<sub>3</sub>, for spectroscopy, #167730010), dimethylsulfoxide (DMSO, for spectrometry, #D5293) and absolute EtOH (99% # E/0600DF/17) were provided by Acros, TCI and Fisher respectively. Bovine serum albumine (BSA, standard grade, lyophilized, #1000-70) was purchased from H2B. Formic acid (puriss p.a., ACS reagent, reagent grade, Ph. Eur., ≥98%, #33015) was purchased from Sigma-Aldrich. The HPLC-gradient grade MeCN was obtained from Carlo Erba or VWR. All aq. mobile phase and buffers used in this work (aq. formic acid and phosphate buffered saline) and aq. mobile-phases for HPLC were prepared using ultrapure water produced by an ELGA PURELAB Ultra system (purified to 18.2 MΩ.cm).

## 2. Instruments and methods

<sup>1</sup>H, <sup>13</sup>C and <sup>19</sup>F NMR spectra were recorded on Brüker Avance 400 MHz or 600 MHz spectrometers. Chemical shifts (δ) are reported in parts per million (ppm) and residual non-deuterated solvent peaks were used as internal reference (proton δ = 7.26 and carbon δ = 77.16 for CDCl<sub>3</sub> and proton δ = 2.50 and carbon δ = 39.52 for DMSO-*d*<sub>6</sub>).<sup>1</sup> <sup>1</sup>H NMR coupling constants (*J*) are reported in Hertz (Hz). The following abbreviations were used in reporting multiplicities: s (singlet), d (doublet), t (triplet), m (multiplet), dd (doublet of doublets), ddd (doublet of doublet of doublets). HPLC-MS analyses were performed on a Thermo-Dionex Ultimate 3000 instrument (pump + autosampler at 20 °C + column oven at 25 °C) equipped with a diode array detector (Thermo-Dionex DAD 3000-RS) and a MSQ Plus single quadrupole mass spectrometer. Low-resolution mass spectra (LRMS) were recorded on a Thermo Scientific MSQ Plus single quadrupole equipped with an electrospray ionization (ESI) source (HPLC-MS coupling). High-resolution mass spectra (HRMS) were recorded on micrOTOF-QII equipped with an ESI analytical source. UV-visible spectra were obtained either on a Varian Cary 50 scan (single-beam) or an Agilent technologies 60 (single-beam) spectrophotometer (software Cary WinUV) by using rectangular quartz cells (Hellma, 100-QS, 45 × 12.5 × 12.5 mm, pathlength: 10 mm, chamber volume: 3.5 mL), at 25 °C (using a temperature control system combined with water circulation). Fluorescence spectra (emission/excitation spectra) were recorded with an HORIBA Jobin Yvon

Fluorolog spectrofluorometer (FluorEssence software) at 25 °C (using a temperature control system combined with water circulation), with standard fluorometer cells (Labbox, LB Q, light path: 10 mm, width: 10 mm, chamber volume: 3.5 mL). The absorption and fluorescence emission spectra were recorded with dye solutions of concentrations in the range of  $10^{-5}$ - $10^{-6}$  M. The emission spectra were recorded in the range of 635-850 nm after excitation at 620 nm (shutter: Auto Open, integration time = 0.1 s, 1 nm step, HV(S1) = 950 V, excitation slit = 5 nm and emission slit = 5 nm). The excitation spectra were recorded in the range of 400-750 nm after emission at 760 nm (excitation slit = 5 nm for spectra recorded in  $\text{CHCl}_3$  and 12 nm for spectra recorded in EtOH or PBS + 5% BSA and emission slit = 5 nm). All excitation/emission spectra are corrected. High-performance liquid chromatography analyses, the following chromatographic systems were used for the analytical experiments: *System A*: RP-HPLC (Phenomenex Kinetex  $\text{C}_{18}$  column, 2.6  $\mu\text{m}$ , 2.1  $\times$  50 mm) with MeCN (+ 0.1% FA) and 0.1% aq. formic acid (aq. FA, pH 2.5) as eluents [5% MeCN (0.1 min) followed by a linear gradient from 5% to 100% (5 min) of MeCN, then 100% MeCN (4 min)] at a flow rate of 0.5 mL  $\text{min}^{-1}$ . UV-visible detection was achieved at four distinct wavelengths 220, 260, 600 and 650 nm (+ diode array detection in the range 220-800 nm). Low resolution ESI-MS detection in the positive/negative mode (full scan, 100-1500 a.m.u., peaking format: centroid, needle voltage: 3.0 kV, probe temperature: 350 °C, cone voltage: 75 V, detector voltage: 1153 V and scan time: 1 s). *System B*: system A with the following gradient [5% MeCN (0.1 min), followed by a linear gradient from 5% to 50% (2.5 min) and 50% to 100% (5 min) of MeCN].

### 3. Synthesized compounds

#### 3.1 Preparation of alkynyl-based DHX-hemicyanine fused dyes 1

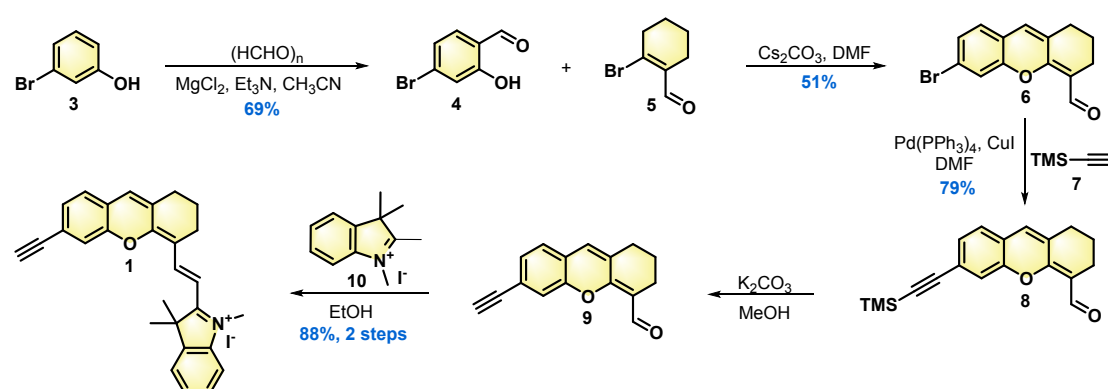

**Scheme S1.** Synthetic route towards alkynyl-based DHX-hemicyanine fused dye **1**.

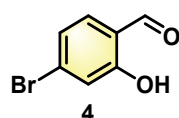

**4-Bromo-2-hydroxybenzaldehyde (4).** To 3-bromophenol **3** (1.0 g, 5.8 mmol) in dry



CH<sub>3</sub>CN (30 mL) at room temperature were added MgCl<sub>2</sub> powder (0.8 g, 8.9 mmol) and TEA (3.2 mL, 22.9 mmol) and the solution was stirred for 20 min. Paraformaldehyde (1.2 g, 41.6 mmol) was added and the mixture was refluxed at 100 °C for 18 h. Deionised water was added and the mixture was acidified with aq. 1.0 M HCl to pH 2. The solution was extracted with Et<sub>2</sub>O (2 × 50 mL) and the combined organic layers were washed with brine (2 × 50 mL) and dried over anhydrous Na<sub>2</sub>SO<sub>4</sub>, filtered and concentrated in vacuo. Purification by flash-column chromatography on silica gel (eluent: 10% EtOAc in hexanes) afforded 4-bromo-2-hydroxybenzaldehyde **4** as a white solid (0.8 g, yield 69%). R<sub>f</sub> (hexanes-EtOAc 9:1 (v/v)): 0.6; <sup>1</sup>H NMR (400 MHz, CDCl<sub>3</sub>): δ = 11.11 (s, 1 H), 9.86 (s, 1 H), 7.41 (d, *J* = 8.2 Hz, 1 H), 7.22-7.13 (m, 2 H) ppm. The spectral data matched with those reported in the literature.<sup>2</sup>

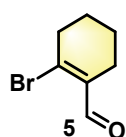

**6-Bromocyclohex-1-ene-1-carbaldehyde (5).** To a mixture of DMF (23.5 mL, 306.0 mmol) and CHCl<sub>3</sub> (100 mL) at 0 °C was added PBr<sub>3</sub> (24.2 mL, 255.0 mmol) portion wise under an atmosphere of N<sub>2</sub>. After 1.5 h, cyclohexanone (10.5 mL, 102.0 mmol) was added and the mixture was stirred at room temperature overnight. The resulting solution was poured onto ice and then solid NaHCO<sub>3</sub> was slowly added until pH ~ 7. The aq. layer was extracted with DCM and the organic layer was washed with deionised water. The combined organic layers were dried over anhydrous Na<sub>2</sub>SO<sub>4</sub> and concentrated under reduced pressure. The yellow mixture was purified by flash-column chromatography on silica gel (eluent: 100% PE) and 6-bromocyclohex-1-ene-1-carbaldehyde **5** was obtained as a pale yellow liquid (13.6 g, yield 72%). <sup>1</sup>H NMR (400 MHz, CDCl<sub>3</sub>): δ = 10.01 (s, 1 H), 2.74 (m, 2 H), 2.26 (m, 2 H), 1.75 (m, 2 H), 1.68 (m, 2 H) ppm. The spectral data matched with those reported in the literature.<sup>2</sup>

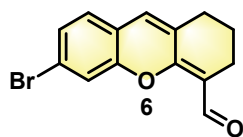

**6-Bromo-2,3-dihydro-1H-xanthene-4-carbaldehyde (6).** To Cs<sub>2</sub>CO<sub>3</sub> (1.2 g, 3.7 mmol) and benzaldehyde **2** (0.3 g, 1.3 mmol) was added DMF (10 mL). 6-Bromocyclohex-1-ene-1-carbaldehyde **3** (0.5 g, 2.6 mmol) in DMF (1 mL) was added slowly and the resulting reaction mixture was stirred at room temperature for 48 h. The mixture was then filtered, washed with deionised water (20 mL) and extracted with EtOAc (3 × 50 mL). The combined organic layers were dried over anhydrous Na<sub>2</sub>SO<sub>4</sub>, filtered and concentrated under reduced pressure. Purification by flash-column chromatography on silica gel (eluent: 20% EtOAc in hexanes) afforded 6-bromo-2,3-dihydro-1H-xanthene-4-carbaldehyde **6** as a yellow solid (0.2 g, yield 51%). R<sub>f</sub> (hexanes-EtOAc 4:1 (v/v)): 0.5; <sup>1</sup>H NMR (400 MHz, CDCl<sub>3</sub>): δ = 10.32 (s, 1 H), 7.30-7.27 (m, 1 H), 7.20 (dd, *J* = 8.1 Hz, *J* = 1.9 Hz, 1 H), 7.01 (d, *J* = 8.2 Hz, 1 H), 6.62 (s,

1 H), 2.57 (t,  $J = 6.6$  Hz,  $J = 1.5$  Hz, 2 H), 2.44 (t,  $J = 6.1$  Hz, 2 H), 1.73 (p,  $J = 6.2$  Hz, 2 H) ppm. The spectral data matched with those reported in the literature.<sup>2</sup>

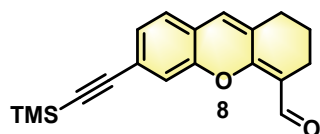

**6-((Trimethylsilyl)ethynyl)-2,3-dihydro-1H-xanthene-4-carbaldehyde (8).**

$\text{Pd(PPh}_3)_4$  (67.5 mg, 8.3 mmol%) and  $\text{CuI}$  (23.6 mg, 0.1 mmol) were degassed in a flame-dried round bottom flask. TEA (1.2 mL, 8.3 mmol) in dry DMF (10 mL) was added with aryl bromide **6** (1.2 g, 4.1 mmol). The solution was degassed again then trimethylsilylacetylene **7** was added (1.8 mL, 12.4 mmol). The reaction mixture was heated to 85 °C for 24 h. After being cooled to room temperature, the reaction mixture was concentrated under vacuum and the resulting residue was purified by flash-column chromatography on silica gel (eluent: 1% EtOAc in PE) affording pure TMS-protected terminal alkyne **8** as a orange solid (1.0 g, yield 79%). m.p 155-157 °C;  $^1\text{H}$  NMR (400 MHz,  $\text{CDCl}_3$ ):  $\delta = 10.30$  (s, 1 H), 7.17 (s, 1 H), 7.13 (dd,  $J = 7.8$  Hz,  $J = 1.2$  Hz, 1 H), 7.05 (d,  $J = 7.8$  Hz, 1 H), 6.62 (s, 1 H), 2.58 (ddd,  $J = 7.5$  Hz,  $J = 5.8$  Hz,  $J = 1.6$  Hz, 2 H), 2.43 (t,  $J = 6.0$  Hz, 2 H), 1.71 (m,  $J = 6.1$  Hz, 2 H), 0.25 (s, 9 H);  $^{13}\text{C}$  NMR (101 MHz,  $\text{CDCl}_3$ ):  $\delta = 188.0$ , 159.9, 151.7, 130.8, 127.6, 126.5, 126.1, 124.6, 121.6, 118.6, 113.8, 104.0, 96.9, 30.3, 21.6, 20.4, 0.0 ppm; HRMS (ESI+):  $m/z$  331.1141  $[\text{M} + \text{Na}]^+$ , calcd for  $\text{C}_{19}\text{H}_{20}\text{O}_2\text{SiNa}^+$  331.1125.

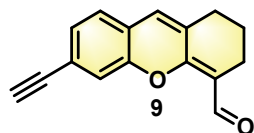

**6-Ethynyl-2,3-dihydro-1H-xanthene-4-carbaldehyde (9).** TMS-protected terminal alkyne **8** (1.0 g, 3.3 mmol) was dissolved in dry MeOH (30 mL) and treated with anhydrous  $\text{K}_2\text{CO}_3$  (1.8 g, 13.2 mmol). The mixture was stirred at room temperature for 5 h. The solvent was removed, and the residue was taken up in 100 mL of DCM and washed with 100 mL of deionised water. The organic layer was dried over anhydrous  $\text{Na}_2\text{SO}_4$  and concentrated under reduced pressure. This compound was used in the next step without further purification, and the yield was assumed to be quantitative. m.p 198-200 °C;  $^1\text{H}$  NMR (400 MHz,  $\text{DMSO}-d_6$ ):  $\delta = 10.26$  (s, 1 H), 7.36 (d,  $J = 7.9$  Hz, 1 H), 7.34 (s, 1 H), 7.24 (dd,  $J = 7.8$  Hz,  $J = 1.5$  Hz, 1 H), 7.01 (s, 1 H), 4.37 (s, 1 H), 2.59 (ddd,  $J = 7.0$  Hz,  $J = 5.3$  Hz,  $J = 1.6$  Hz, 2 H), 2.30 (t,  $J = 6.0$  Hz, 2 H), 1.63 (m,  $J = 6.1$  Hz, 2 H) ppm;  $^{13}\text{C}$  NMR (101 MHz,  $\text{CDCl}_3$ ):  $\delta = 188.1$ , 159.8, 151.7, 131.1, 127.7, 126.6, 125.9, 123.6, 122.0, 118.9, 113.9, 82.8, 79.3, 30.3, 21.6, 20.4 ppm; HRMS (ESI+):  $m/z$  237.0910  $[\text{M} + \text{H}]^+$ , calcd for  $\text{C}_{16}\text{H}_{13}\text{O}_2^+$  237.0910.

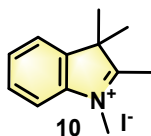

**1,2,3,3-tetramethyl-3*H*-indol-1-ium iodide 10.** To 2,3,3-trimethyl-3*H*-indole (32 mL, 200.0 mmol) in CH<sub>3</sub>CN (200 mL) was added iodomethane (14 mL, 228.0 mmol) portion-wise and the solution was refluxed overnight. The precipitate was filtered and washed with Et<sub>2</sub>O and dried in vacuo to afford 1,2,3,3-tetramethyl-3*H*-indol-1-ium iodide **7** as a light pink solid (56.5 g, 94%). <sup>1</sup>H NMR (400 MHz, DMSO-*d*<sub>6</sub>) δ 7.91 (m, 1H), 7.82 (m, 1H), 7.62 (m, 2H), 3.97 (s, 3H), 2.76 (s, 3H), 1.53 (s, 3H). The spectral data matched with the reference.<sup>2</sup>

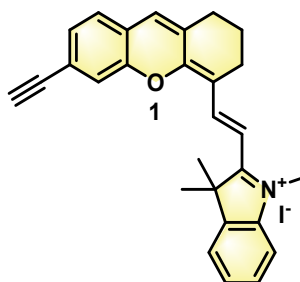

**Alkynyl-based DHX-hemicyanine fused dye (1).** To aldehyde **9** (236 mg, 1.0 mmol) in EtOH (2 mL) was added 1,2,3,3-tetramethyl-3*H*-indol-1-ium iodide **7** (301 mg, 1.0 mmol) and the solution was refluxed at 80 °C for 4 h. The reaction mixture was concentrated and the crude product was purified by flash-column chromatography on silica gel (eluent: 1% MeOH in DCM) to afford DHX **1** as a dark blue solid (345 mg, yield 88%). m.p >300 °C; <sup>1</sup>H NMR (400 MHz, DMSO-*d*<sub>6</sub>): δ = 8.56 (d, *J* = 15.3 Hz, 1 H), 7.80-7.73 (m, 2 H), 7.62 (s, 1 H), 7.58 (m, 1 H), 7.52 (m, 2 H), 7.39-7.33 (m, 2 H), 6.68 (d, *J* = 15.4 Hz, 1 H), 4.52 (s, 1 H), 3.95 (s, 3 H), 2.72 (t, *J* = 6.0 Hz, 2 H), 2.67 (t, *J* = 6.0 Hz, 2 H), 1.83 (p, *J* = 5.9 Hz, 2 H), 1.77 (s, 6 H) ppm; <sup>13</sup>C NMR (101 MHz, DMSO-*d*<sub>6</sub>): δ = 179.0, 158.0, 151.8, 145.1, 142.4, 142.1, 131.1, 129.8, 128.8, 128.4, 127.8, 127.6, 123.8, 122.6, 122.2, 118.6, 114.3, 113.8, 107.2, 83.8, 82.6, 50.8, 33.2, 28.7, 26.9, 23.5, 19.7 ppm; HRMS (ESI+): *m/z* 392.2019 [M]<sup>+</sup>•, calcd for C<sub>28</sub>H<sub>26</sub>NO<sup>+</sup> 392.2009; HPLC (system B): *t*<sub>R</sub> = 5.2 min (purity 96% at 260 nm and 99% at 600 nm); LRMS (ESI+, recorded during RP-HPLC analysis): *m/z* 392.3 [M]<sup>+</sup>• (100), calcd for C<sub>28</sub>H<sub>26</sub>NO<sup>+</sup> 392.2; UV-vis (recorded during the HPLC analysis): λ<sub>max</sub> = 559 and 592 nm (broad band).

### 3.2. Preparation of organic azides 11a-11o

#### Procedure A: general method for preparing azide 11a-11d.

A solution of alkyl bromide (5.0 mmol) and NaN<sub>3</sub> (6.5 mmol) in DMF (10 mL) was heated at 80 °C overnight. The reaction mixture was cooled, diluted with EtOAc, washed with deionised water and brine, dried over anhydrous Na<sub>2</sub>SO<sub>4</sub> and concentrated

under reduced pressure, to afford the corresponding alkyl azide which was used without further purification.

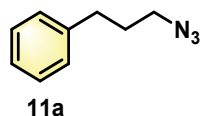

**1-(3-Azidopropyl)benzene (11a).** Yellow oil;  $^1\text{H}$  NMR (400 MHz,  $\text{CDCl}_3$ ):  $\delta$  = 7.30 (m, 5 H), 3.31 (t,  $J$  = 6.8 Hz, 2 H), 2.75 (t,  $J$  = 7.9 Hz, 2 H), 1.95 (m, 2 H) ppm. The spectral data matched with those reported in the literature.<sup>3</sup>

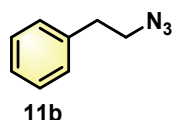

**1-(2-Azidoethyl)benzene (11b).** Yellow oil;  $^1\text{H}$  NMR (400 MHz,  $\text{CDCl}_3$ ):  $\delta$  = 7.41 (m, 2 H), 7.32 (m, 3 H), 3.55 (t,  $J$  = 7.1 Hz, 2 H), 2.97 (t,  $J$  = 7.1 Hz, 2 H) ppm. The spectral data matched with those reported in the literature.<sup>3</sup>

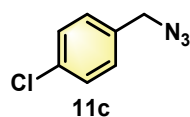

**1-(Azidomethyl)-4-bromobenzene (11c).** Colorless liquid;  $^1\text{H}$  NMR (400 MHz,  $\text{CDCl}_3$ ):  $\delta$  = 7.53-7.49 (m, 2 H), 7.21-7.19 (m, 2 H), 4.30 (s, 2 H) ppm. The spectral data matched with those reported in the literature.<sup>4</sup>

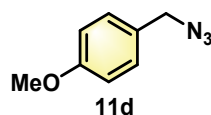

**4-Methoxybenzyl azide (11d).** Colourless oil;  $^1\text{H}$  NMR (600 MHz,  $\text{CDCl}_3$ ):  $\delta$  = 7.24 (dd,  $J$  = 8.7 Hz,  $J$  = 2.1 Hz, 2 H), 6.90 (dd,  $J$  = 8.7 Hz,  $J$  = 2.1 Hz, 2 H), 4.27 (s, 2 H), 3.82 (s, 3 H) ppm. The spectral data matched with those reported in the literature.<sup>5</sup>

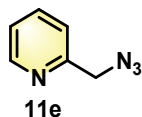

**2-(Azidomethyl)pyridine (11e).**  $\text{NaN}_3$  (11.8 g, 181.6 mmol) and 2-chloromethylpyridine hydrochloride (5.7 g, 45.1 mmol) were added to 200 mL of deionised water. The resulting reaction mixture was heated to 50 °C for 24 h. Thereafter, reaction was neutralised with solid  $\text{NaHCO}_3$  (11.8 g, 140.5 mmol) and extracted with DCM (3  $\times$  30 mL). The combined organic layers were dried over anhydrous  $\text{MgSO}_4$  and evaporated under reduced pressure, to give the desired 2-(azidomethyl)pyridine **11e** as a yellow oil (4.6 g, yield 75%).  $^1\text{H}$  NMR (400 MHz,  $\text{CDCl}_3$ ):  $\delta$  = 8.64 (d,  $J$  = 4.2 Hz, 1 H), 7.77 (t,  $J$  = 7.6 Hz, 1 H), 7.36 (d,  $J$  = 7.6 Hz, 1 H), 7.28 (t,  $J$  = 4.2 Hz, 1 H), 4.42 (s, 2 H) ppm. The spectral data matched with those reported in the literature.<sup>6</sup>

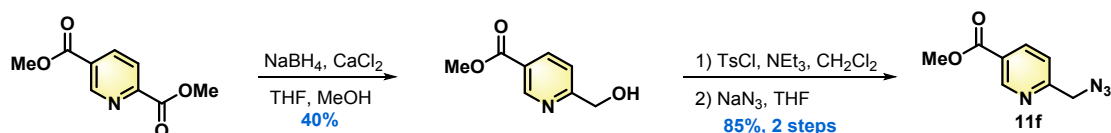

**Scheme S2** Synthetic route towards organic azide **11f**.

**Methyl 5-(azidomethyl)nicotinate (11f).** NaBH<sub>4</sub> (265 mg, 7.0 mmol) was added in portions to a slurry of 2,5-pyridinedicarboxylic acid dimethyl ester (544 mg, 2.8 mmol) and CaCl<sub>2</sub> (1.2 g, 11.2 mmol) in a mixture of dry THF (5 mL) and dry MeOH (10 mL). The reaction was stirred at 0 °C for 3 h. Excess of NaBH<sub>4</sub> was then quenched by adding 10 mL of ice-cold water. After extraction with CHCl<sub>3</sub> (3 × 20 mL), the combined organic layers were dried over anhydrous MgSO<sub>4</sub> and finally concentrated under reduced pressure to provide intermediate benzyl alcohol as a white solid (187 mg, yield 40%). R<sub>f</sub> (EtOAc-hexanes 1:1 (v/v)): 0.3; <sup>1</sup>H NMR (600 MHz, CDCl<sub>3</sub>): δ = 9.16, (d, *J* = 2.0 Hz, 1 H), 8.29 (dd, *J* = 2.0 Hz, *J* = 8.5 Hz, 1 H), 7.36 (d, *J* = 8.5 Hz, 1 H), 4.83 (s, 2 H), 3.96 (s, 3 H) ppm. The spectral data matched with those reported in the literature.<sup>6</sup>

To a solution of 6-(hydroxymethyl)nicotinic acid methyl ester (16.7 mg, 0.1 mmol) in DCM (2 mL) was added tosyl chloride (TsCl, 25.6 mg, 0.1 mmol) and TEA (62 μL, 0.4 mmol). The resulting reaction mixture was stirred for 2 h. Thereafter, DCM was removed under reduced pressure and the resulting residue was dissolved in THF (1 mL), and NaN<sub>3</sub> (58 mg, 0.9 mmol) was added. The reaction mixture was stirred at room temperature for 24 h, then diluted with EtOAc and deionised water. The aq. layer was further extracted with EtOAc thrice. The combined organic layers were washed with brine, dried over anhydrous Na<sub>2</sub>SO<sub>4</sub>, and concentrated under reduced pressure. The resulting residue was purified by flash-column chromatography over silica gel (eluent: EtOAc-hexanes 4:1 (v/v)) to afford alkyl azide **11f** as a light yellow solid (16 mg, overall yield 85%). R<sub>f</sub> (EtOAc-hexanes 1:1 (v/v)): 0.8; <sup>1</sup>H NMR (600 MHz, CDCl<sub>3</sub>): δ = 9.18 (d, *J* = 2.0 Hz, 1 H), 8.32 (dd, *J* = 8.5 Hz, *J* = 2.0 Hz, 1 H), 7.44 (d, *J* = 8.5 Hz, 1 H), 4.56 (s, 2 H), 3.95 (s, 3 H) ppm. The spectral data matched with those reported in the literature.<sup>6</sup>

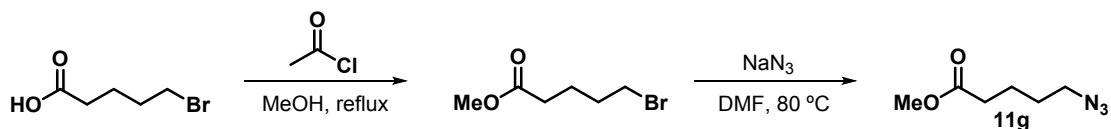

**Scheme S3.** Synthetic route towards organic azide **11g**.

**Methyl 5-azidopentanoate (11g).** 5-Bromovaleric acid (3.0 g, 16.6 mmol) was dissolved in MeOH (50 mL) and acetyl chloride (1.3 g, 16.6 mmol) was added. The resulting reaction mixture was refluxed for 5 h. Thereafter, solvent was removed under reduced pressure, affording intermediate δ-bromo ester as a yellowish solid (3.5 g, yield

99%).  $^1\text{H}$  NMR (600 MHz,  $\text{CDCl}_3$ ):  $\delta$  = 3.67 (s, 3 H), 3.41 (t,  $J$  = 6.3 Hz, 2 H), 2.35 (t,  $J$  = 7.4 Hz, 2 H), 1.65-1.67 (m, 2 H), 1.56-1.59 (m, 2 H).

A solution of methyl 5-bromovalerate (3.4 g, 16.4 mmol) and  $\text{NaN}_3$  (1.6 g, 24.6 mmol) in DMF (35 mL) was heated at 80 °C overnight. The reaction mixture was cooled to room temperature, diluted with EtOAc, washed with deionised water and brine, dried over anhydrous  $\text{Na}_2\text{SO}_4$  and finally concentrated under reduced pressure, to afford pure methyl 5-azidopentanoate **11g** as a pale yellow oil (2.6 g, yield 95%).  $^1\text{H}$  NMR (400 MHz,  $\text{CDCl}_3$ ):  $\delta$  = 3.67 (s, 3 H), 3.39 (t,  $J$  = 7.0 Hz, 2 H), 2.38 (m, 2 H), 1.91-1.60 (m, 4 H) ppm. The spectral data matched with those reported in the literature.<sup>7</sup>

#### Procedure B: general method for preparing azide 11h-11m.

Aniline (5.0 mmol) was dissolved in aq. 2.0 M HCl (10 mL). The solution was cooled to 0 °C and aq. solution of  $\text{NaNO}_2$  (6.0 mmol) in 1.5 mL deionised water was slowly added. The mixture was stirred for 30 min followed by the addition of  $\text{NaN}_3$  (7.5 mmol) in deionised water (1.5 mL). After 3 h of stirring, the resulting solution was extracted with EtOAc (3  $\times$  50 mL). The combined organic layers were washed with brine (20 mL), dried over anhydrous  $\text{Na}_2\text{SO}_4$ , and finally concentrated under reduced pressure to provide the corresponding pure organic azide.

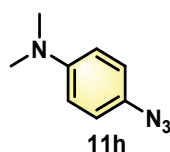

**5-Azido-*N,N*-dimethylaniline (11h).** Brown crystalline solid;  $^1\text{H}$  NMR (400 MHz,  $\text{CDCl}_3$ ):  $\delta$  = 6.91 (d,  $J$  = 7.8 Hz, 2 H), 6.71 (d,  $J$  = 8.4 Hz, 2 H), 2.93 (s, 6 H) ppm. The spectral data matched with those reported in the literature.<sup>8</sup>

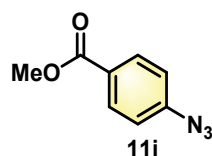

**Methyl 4-azidobenzoate (11i).** Pale yellow solid;  $^1\text{H}$  NMR (400 MHz,  $\text{CDCl}_3$ ):  $\delta$  = 8.05-8.01 (m, 2 H), 7.09-7.04 (m, 2 H), 3.91 (s, 3 H) ppm. The spectral data matched with those reported in the literature.<sup>9</sup>

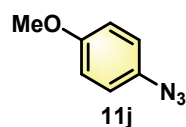

**1-Azido-4-methoxybenzene (11j).** Brown solid;  $^1\text{H}$  NMR (400 MHz,  $\text{CDCl}_3$ ):  $\delta$  = 6.96-6.92 (m, 2 H), 6.90-6.86 (m, 2 H), 3.78 (s, 3 H) ppm. The spectral data matched with those reported in the literature.<sup>9</sup>

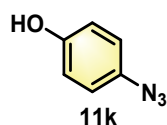

**4-Azidophenol (11k).** Yellow solid;  $^1\text{H}$  NMR (400 MHz,  $\text{CDCl}_3$ ):  $\delta$  = 6.95-6.87 (m, 2 H), 6.86-6.79 (m, 2 H), 5.13 (brs, 1 H) ppm. The spectral data matched with those reported in the literature.<sup>9</sup>

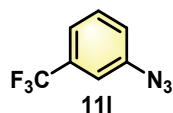

**1-Azido-3-trifluoromethylbenzene (11l).** Orange oil;  $^1\text{H}$  NMR (400 MHz,  $\text{CDCl}_3$ ):  $\delta$  = 7.48-7.44 (m, 1 H), 7.39-7.37 (m, 1 H), 7.24 (s, 1 H), 7.20-7.18 (m, 1 H) ppm. The spectral data matched with those reported in the literature.<sup>10</sup>

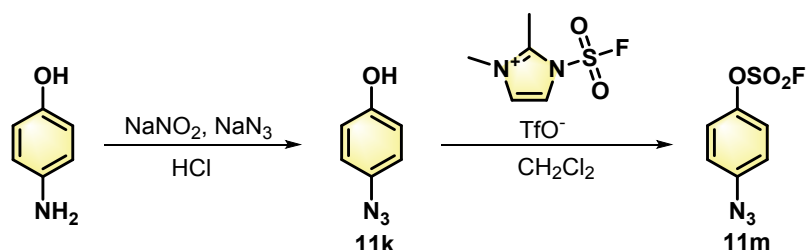

**Scheme S4.** Synthetic route towards organic azide **11m**.

**4-Azidophenyl fluorosulfate (11m).** 4-Azidophenol **11k** (5.0 mmol), prepared according to procedure A described above, was dissolved in DCM (5 mL). TEA (1.2 mL, 8.0 mmol) was added, followed by 1-(fluorosulfonyl)-2,3-dimethyl-1H-imidazol-3-ium trifluoromethanesulfonate (2.1 g, 6.5 mmol). The resulting reaction mixture was stirred at room temperature for 2 h. Thereafter, volatiles were removed under reduced pressure, and the resulting crude product was purified by flash-column chromatography over silica gel (eluent: 100% PE) to provide compound **11m** as a pale yellow liquid (1.0 g, yield 92%).  $^1\text{H}$  NMR (400 MHz,  $\text{CDCl}_3$ ):  $\delta$  = 7.35-7.30 (m, 2 H), 7.12-7.07 (m, 2 H) ppm;  $^{13}\text{C}$  NMR (101 MHz,  $\text{CDCl}_3$ ):  $\delta$  = 146.6, 140.8, 122.5, 120.7 ppm;  $^{19}\text{F}$  NMR (377 MHz,  $\text{CDCl}_3$ ):  $\delta$  = 37.2 (s, 1 F) ppm; HRMS (ESI-):  $m/z$  213.9928  $[\text{M} - \text{H}]^-$ , calcd for  $\text{C}_6\text{H}_4\text{N}_3\text{O}_4\text{S}^-$  213.9928. *Please note: hydrolysis of fluorosulfate moiety was occurred during the ionisation process.*

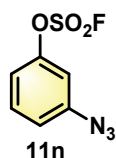

**4-Azidophenyl fluorosulfate (11n).** The same procedure as that devised for **11m** was used.  $^1\text{H}$  NMR (400 MHz,  $\text{CDCl}_3$ ):  $\delta$  = 7.45 (t,  $J$  = 8.2 Hz, 1 H), 7.15-7.11 (m, 1 H), 7.09 (ddd,  $J$  = 8.1 Hz,  $J$  = 2.1 Hz,  $J$  = 1.0 Hz, 1 H), 6.99 (td,  $J$  = 2.2 Hz,  $J$  = 1.0 Hz, 1 H) ppm;  $^{13}\text{C}$  NMR (101 MHz,  $\text{CDCl}_3$ ):  $\delta$  = 150.7, 142.6, 131.4, 119.2, 117.1, 112.1

ppm;  $^{19}\text{F}$  NMR (377 MHz,  $\text{CDCl}_3$ ):  $\delta = 38.0$  (s, 1 F) ppm; HRMS (ESI-):  $m/z$  213.9927  $[\text{M} - \text{H}]^-$ , calcd for  $\text{C}_6\text{H}_4\text{N}_3\text{O}_4\text{S}^-$  213.9928. *Please note: hydrolysis of fluorosulfate moiety was occurred during the ionisation process.*

### 2-Azidophenyl (11o).

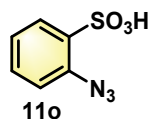

**2-Azidobenzenesulfonic acid (11o).** Prepared according to procedure B. Pink solid;  $^1\text{H}$  NMR (400 MHz,  $\text{CDCl}_3$ )  $\delta$  7.72 (d,  $J = 8.2$  Hz, 1H), 7.37 (t,  $J = 8.0$  Hz, 1H), 7.17-7.15 (m, 2H), 2.51 (s, 1H). The spectral data matched with those reported in the literature.<sup>11</sup>

## 3.3 General procedure for the CuAAC reaction

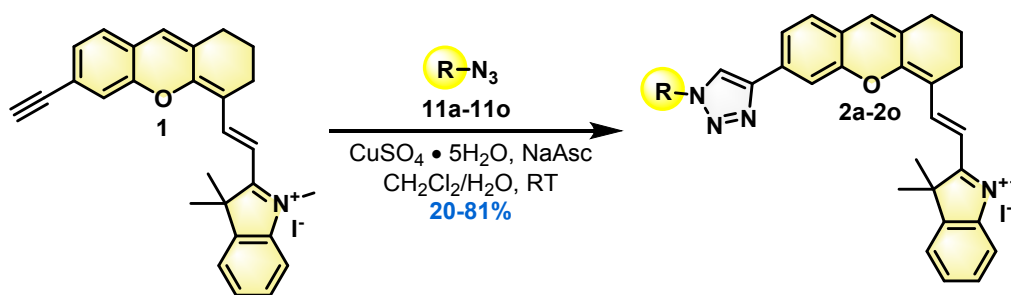

**General procedure for the synthesis of triazole-based DHX-hemicyanine fused dyes 2a-2o.** To a mixture of alkynyl-based DHX-hemicyanine fused dye **1** (784 mg, 2.0 mmol, 1.0 equiv.) and the corresponding organic azide (2.6 mmol, 1.3 equiv.) in deionised water and  $\text{CH}_2\text{Cl}_2$  (1:1 (v/v), 100 mL), sodium ascorbate (79.2 mg, 0.4 mmol, 0.2 equiv.) was added, followed by the addition of  $\text{CuSO}_4 \cdot 5 \text{H}_2\text{O}$  (25 mg, 0.1 mmol, 0.05 equiv.). The heterogeneous mixture was stirred vigorously at room temperature overnight. Thereafter, the reaction mixture was concentrated under reduced pressure and directly purified by flash-column chromatography on silica gel (eluent: 1% MeOH in DCM) to afford the corresponding triazole **2a-2o** as a dark blue solid.



**Table S1.** Triazole-based DHX-hemicyanine fused dyes synthesised through CuAAc reaction from alkynyl-based DHX **1** and the corresponding organic azides (structures of starting materials and reaction yields).

| Organic azide                                                                           | Product   | Yield |
|-----------------------------------------------------------------------------------------|-----------|-------|
|  11a   | <b>2a</b> | 50%   |
|  11b   | <b>2b</b> | 52%   |
|  11c   | <b>2c</b> | 74%   |
|  11d   | <b>2d</b> | 36%   |
|  11e   | <b>2e</b> | 81%   |
|  11f | <b>2f</b> | 61%   |
|  11g | <b>2g</b> | 67%   |
|  11h | <b>2h</b> | 36%   |
|  11i | <b>2i</b> | 22%   |
|  11j | <b>2j</b> | 80%   |
|  11k | <b>2k</b> | 41%   |

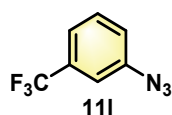

2l

43%

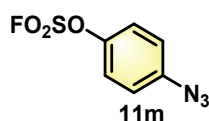

2m

48%

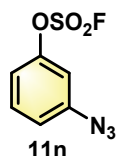

2n

20%

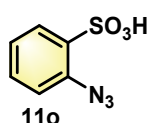

2o

14%

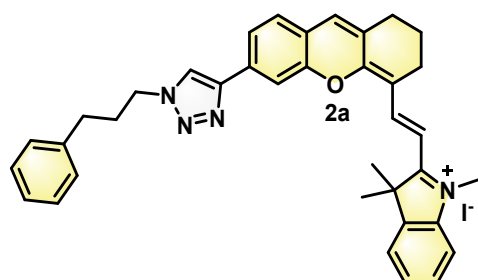

**2a:** 51 mg, 50% yield; dark blue solid; m.p 80-82 °C;  $^1\text{H}$  NMR (600 MHz,  $\text{DMSO}-d_6$ ):  $\delta$  = 8.85 (s, 1 H), 8.59 (d,  $J$  = 15.2 Hz, 1 H), 7.85 (s, 1 H), 7.77 (m, 2 H), 7.72 (d,  $J$  = 8.0 Hz, 1 H), 7.61 (d,  $J$  = 8.0 Hz, 1 H), 7.56 (td,  $J$  = 7.7 Hz,  $J$  = 1.2 Hz, 1 H), 7.51-7.48 (m, 1 H), 7.41 (s, 1 H), 7.31 (t,  $J$  = 7.6 Hz, 2 H), 7.26-7.23 (m, 2 H), 7.21 (td,  $J$  = 7.2 Hz,  $J$  = 1.4 Hz, 1 H), 6.59 (d,  $J$  = 15.2 Hz, 1 H), 4.45 (t,  $J$  = 7.1 Hz, 2 H), 3.91 (s, 3 H), 2.72 (t,  $J$  = 6.2 Hz, 2 H), 2.66-2.61 (m, 4 H), 2.23-2.17 (m, 2 H), 1.87-1.81 (m, 2 H), 1.80 (s, 6 H) ppm;  $^{13}\text{C}$  NMR (151 MHz,  $\text{DMSO}-d_6$ ):  $\delta$  = 178.4, 159.0, 152.6, 145.0, 144.9, 142.2, 142.2, 140.7, 133.7, 131.0, 129.8, 128.8, 128.4, 128.3, 128.2, 127.5, 126.0, 122.7, 122.6, 122.2, 121.1, 114.1, 113.6, 111.2, 106.2, 50.6, 49.2, 33.0, 31.9, 31.3, 28.7, 27.0, 23.5, 19.8 ppm; HRMS (ESI<sup>+</sup>):  $m/z$  553.2972 [ $\text{M}$ ]<sup>+</sup>, calcd for  $\text{C}_{37}\text{H}_{37}\text{N}_4\text{O}^+$  553.2962; HPLC (system A):  $t_R$  = 5.3 min (purity 95% at 260 nm and 99% at 600 nm); LRMS (ESI<sup>+</sup>, recorded during RP-HPLC analysis):  $m/z$  553.3 (100) and 554.3 (30) [ $\text{M}$ ]<sup>+</sup>, calcd for  $\text{C}_{37}\text{H}_{37}\text{N}_4\text{O}^+$  553.3; UV-vis (recorded during the HPLC analysis):  $\lambda_{\text{max}}$  = 571, 601 and 647 nm (broad band).

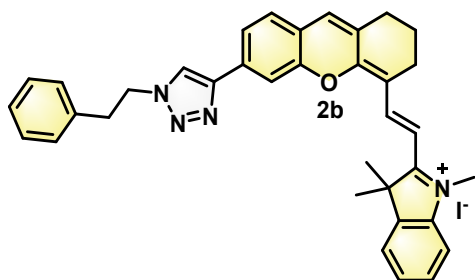

**2b:** 52 mg, 52% yield; dark blue solid; m.p 88-90 °C;  $^1\text{H}$  NMR (400 MHz,  $\text{DMSO}-d_6$ ):  $\delta$  = 8.77 (s, 1 H), 8.61 (d,  $J$  = 15.2 Hz, 1 H), 7.84 (s, 1 H), 7.82-7.70 (m, 3 H), 7.64-7.48 (m, 3 H), 7.42 (s, 1 H), 7.33-7.19 (m, 5 H), 6.62 (d,  $J$  = 15.3 Hz, 1 H), 4.71 (t,  $J$  = 7.3 Hz, 2 H), 3.92 (s, 3 H), 3.25 (t,  $J$  = 7.3 Hz, 2 H), 2.78-2.70 (m, 2 H), 2.67 (t,  $J$  = 5.9 Hz, 2 H), 1.88-1.83 (m, 2 H), 1.81 (s, 6 H) ppm;  $^{13}\text{C}$  NMR (101 MHz,  $\text{DMSO}-d_6$ ):  $\delta$  = 178.5, 159.0, 152.7, 145.0, 144.8, 142.2, 142.2, 137.5, 133.6, 131.0, 129.9, 128.8, 128.7, 128.4, 128.2, 127.6, 126.6, 122.8, 122.6, 122.1, 121.1, 114.2, 113.6, 111.3, 106.3, 50.8, 50.6, 35.5, 33.0, 28.7, 27.1, 23.5, 19.8 ppm; HRMS (ESI $^{+}$ ):  $m/z$  539.2802  $[\text{M}]^{+\bullet}$ , calcd for  $\text{C}_{36}\text{H}_{35}\text{N}_4\text{O}^{+}$  539.2805; HPLC (system A):  $t_R$  = 5.2 min (purity 96% at 260 nm and 99% at 600 nm); LRMS (ESI $^{+}$ , recorded during RP-HPLC analysis):  $m/z$  539.1 (100) and 540.2 (45)  $[\text{M}]^{+\bullet}$ , calcd for  $\text{C}_{36}\text{H}_{35}\text{N}_4\text{O}^{+}$  539.3; UV-vis (recorded during the HPLC analysis):  $\lambda_{\text{max}}$  = 569, 601 and 648 nm (broad band).

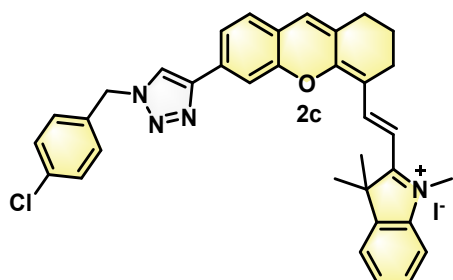

**2c:** 76 mg, 74% yield; dark blue solid; m.p 202-204 °C;  $^1\text{H}$  NMR (400 MHz,  $\text{DMSO}-d_6$ ):  $\delta$  = 8.90 (s, 1 H), 8.62-8.57 (m, 1 H), 8.57-8.53 (m, 1 H), 7.88 (s, 1 H), 7.87-7.84 (m, 1 H), 7.79 (m, 2 H), 7.72 (d,  $J$  = 8.0 Hz, 1 H), 7.62-7.46 (m, 3 H), 7.43-7.35 (m, 3 H), 6.60 (d,  $J$  = 15.3 Hz, 1 H), 5.82 (s, 2 H), 3.91 (s, 3 H), 2.72 (t,  $J$  = 6.0 Hz, 2 H), 2.64 (t,  $J$  = 6.0 Hz, 2 H), 1.85-1.81 (m, 2 H), 1.80 (s, 6 H) ppm;  $^{13}\text{C}$  NMR (101 MHz,  $\text{DMSO}-d_6$ ):  $\delta$  = 178.5, 159.0, 154.7, 152.6, 149.5, 145.1, 144.9, 142.2, 142.2, 137.4, 133.5, 131.0, 129.9, 128.8, 128.2, 127.5, 123.8, 123.4, 122.6, 122.3, 122.2, 121.2, 114.1, 113.6, 111.4, 106.2, 54.7, 50.6, 33.0, 28.7, 27.0, 23.5, 19.8 ppm; HRMS (ESI $^{+}$ ):  $m/z$  559.2254  $[\text{M}]^{+\bullet}$ , calcd for  $\text{C}_{35}\text{H}_{32}\text{ClN}_4\text{O}^{+}$  559.2259; HPLC (system A):  $t_R$  = 5.3 min (purity 97% at 260 nm and 99% at 600 nm); LRMS (ESI $^{+}$ , recorded during RP-HPLC analysis):  $m/z$  559.3 (100), 560.4 (40) and 561.4 (30)  $[\text{M}]^{+\bullet}$ , calcd for  $\text{C}_{35}\text{H}_{32}\text{ClN}_4\text{O}^{+}$  559.2; UV-vis (recorded during the HPLC analysis):  $\lambda_{\text{max}}$  = 568, 601 and 647 nm (broad band).

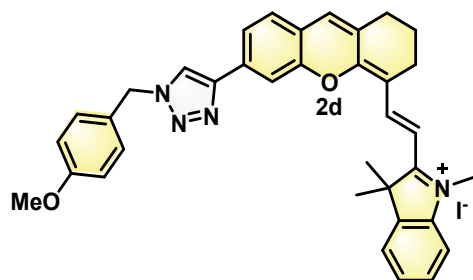

**2d**: 37 mg, 36% yield; dark blue solid; m.p 189-191 °C;  $^1\text{H}$  NMR (400 MHz,  $\text{DMSO-}d_6$ ):  $\delta$  = 9.05 (dd,  $J$  = 2.2,  $J$  = 1.0 Hz, 1 H), 8.92 (s, 1 H), 8.61 (d,  $J$  = 15.2 Hz, 1 H), 8.36 (dd,  $J$  = 8.2 Hz,  $J$  = 2.2 Hz, 1 H), 7.89 (s, 1 H), 7.79 (m, 2 H), 7.74-7.70 (m, 1 H), 7.63-7.47 (m, 4 H), 7.42 (s, 1 H), 6.62 (d,  $J$  = 15.2 Hz, 1 H), 5.95 (s, 2 H), 3.92 (s, 3 H), 3.88 (s, 3 H), 2.73 (t,  $J$  = 5.9 Hz, 2 H), 2.69-2.62 (m, 2 H), 1.88-1.81 (m, 2 H), 1.80 (s, 6 H) ppm;  $^{13}\text{C}$  NMR (101 MHz,  $\text{DMSO-}d_6$ ):  $\delta$  = 178.5, 159.2, 159.0, 152.7, 145.3, 144.9, 142.2, 142.2, 133.5, 131.0, 129.9, 129.6, 128.8, 128.2, 127.7, 127.6, 126.5, 122.7, 122.6, 122.2, 121.2, 114.2, 114.2, 113.6, 111.3, 106.2, 55.2, 52.7, 50.6, 32.9, 28.7, 27.0, 23.5, 19.8 ppm; HRMS (ESI<sup>+</sup>):  $m/z$  555.2778  $[\text{M}]^{+\bullet}$ , calcd for  $\text{C}_{36}\text{H}_{35}\text{N}_4\text{O}_2^{+}$  555.2755; HPLC (system A):  $t_R$  = 5.1 min (purity 96% at 260 nm and 98% at 600 nm); LRMS (ESI<sup>+</sup>, recorded during RP-HPLC analysis):  $m/z$  555.0 (100) and 556.5 (55)  $[\text{M}]^{+\bullet}$ , calcd for  $\text{C}_{36}\text{H}_{35}\text{N}_4\text{O}_2^{+}$  555.3; UV-vis (recorded during the HPLC analysis):  $\lambda_{\text{max}}$  = 568, 601 and 647 nm (broad band).

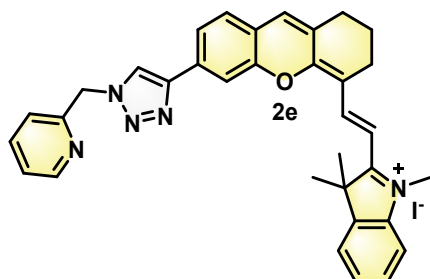

**2e**: 79 mg, 81% yield; dark blue solid; m.p 226-228 °C;  $^1\text{H}$  NMR (400 MHz,  $\text{DMSO-}d_6$ ):  $\delta$  = 8.87 (s, 1 H), 8.59 (d,  $J$  = 15.2 Hz, 1 H), 7.86 (s, 1 H), 7.80-7.70 (m, 3 H), 7.63-7.53 (m, 2 H), 7.53-7.45 (m, 3 H), 7.43-7.36 (m, 3 H), 6.61 (d,  $J$  = 15.2 Hz, 1 H), 5.72 (s, 2 H), 3.92 (s, 3 H), 2.72 (t,  $J$  = 6.0 Hz, 2 H), 2.65 (t,  $J$  = 6.1 Hz, 2 H), 1.87-1.81 (m, 2 H), 1.79 (s, 6 H) ppm;  $^{13}\text{C}$  NMR (101 MHz,  $\text{DMSO-}d_6$ ):  $\delta$  = 178.5, 158.9, 152.6, 145.3, 144.9, 142.2, 142.2, 134.8, 133.4, 132.9, 131.0, 130.0, 129.8, 128.8, 128.2, 127.6, 123.0, 122.6, 122.2, 121.2, 114.2, 113.6, 111.4, 106.3, 52.3, 50.6, 33.0, 28.7, 27.0, 23.5, 19.8 ppm; HRMS (ESI<sup>+</sup>):  $m/z$  526.2605  $[\text{M}]^{+\bullet}$ , calcd for  $\text{C}_{34}\text{H}_{32}\text{N}_5\text{O}^{+}$  526.2601; HPLC (system A):  $t_R$  = 4.7 min (purity 98% at 260 nm and 99% at 600 nm); LRMS (ESI<sup>+</sup>, recorded during RP-HPLC analysis):  $m/z$  526.3 (100) and 527.4 (35)  $[\text{M}]^{+\bullet}$ , calcd for  $\text{C}_{34}\text{H}_{32}\text{N}_5\text{O}^{+}$  526.2; UV-vis (recorded during the HPLC analysis):  $\lambda_{\text{max}}$  = 567, 601 and 646 nm (broad band). **Note**: we found that dye **2e** was contaminated by a small quantity of 3,4-dihydroxy-2-oxobutanoic acid coming from the CuAAC reaction and which we estimated to be 1.4% by integration by  $^1\text{H}$  NMR analysis.

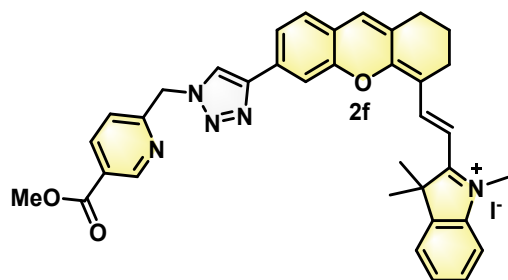

**2f**: 65 mg, 61% yield; dark blue solid; m.p 125-127 °C;  $^1\text{H}$  NMR (400 MHz,  $\text{DMSO-}d_6$ ):  $\delta$  = 9.05 (dd,  $J$  = 2.2 Hz,  $J$  = 1.0 Hz, 1 H), 8.92 (s, 1 H), 8.61 (d,  $J$  = 15.2 Hz, 1 H), 8.36 (dd,  $J$  = 8.2 Hz,  $J$  = 2.2 Hz, 1H), 7.89 (s, 1 H), 7.79 (m, 2 H), 7.74-7.70 (m, 1 H), 7.63-7.47 (m, 4 H), 7.42 (s, 1 H), 6.62 (d,  $J$  = 15.2 Hz, 1 H), 5.95 (s, 2 H), 3.92 (s, 3 H), 3.88 (s, 3 H), 2.73 (t,  $J$  = 5.9 Hz, 2 H), 2.69-2.62 (m, 2 H), 1.88-1.81 (m, 2 H), 1.80 (s, 6 H) ppm;  $^{13}\text{C}$  NMR (101 MHz,  $\text{DMSO-}d_6$ ):  $\delta$  = 178.5, 164.8, 159.2, 159.0, 152.7, 149.9, 145.2, 145.0, 142.2, 142.2, 138.2, 133.4, 131.0, 130.0, 128.8, 128.2, 127.5, 125.0, 124.0, 122.6, 122.2, 121.2, 114.2, 113.6, 111.4, 106.3, 54.3, 52.5, 50.6, 33.0, 28.7, 27.0, 23.5, 19.8 ppm; HRMS (ESI<sup>+</sup>):  $m/z$  584.2673 [ $\text{M}$ ]<sup>+</sup>, calcd for  $\text{C}_{36}\text{H}_{34}\text{N}_5\text{O}_3^+$  584.2656; HPLC (system A):  $t_R$  = 4.8 min (purity 97% at 260 nm and 100% at 600 nm); LRMS (ESI<sup>+</sup>, recorded during RP-HPLC analysis):  $m/z$  584.4 (100) and 585.4 (40) [ $\text{M}$ ]<sup>+</sup>, calcd for  $\text{C}_{36}\text{H}_{34}\text{N}_5\text{O}_3^+$  584.2; UV-vis (recorded during the HPLC analysis):  $\lambda_{\text{max}}$  = 570, 601 and 646 nm (broad band). **Note**: we found that dye **2f** was contaminated by a small quantity of 3,4-dihydroxy-2-oxobutanoic acid coming from the CuAAC reaction and which we estimated to be 2.4% by integration by  $^1\text{H}$  NMR analysis.

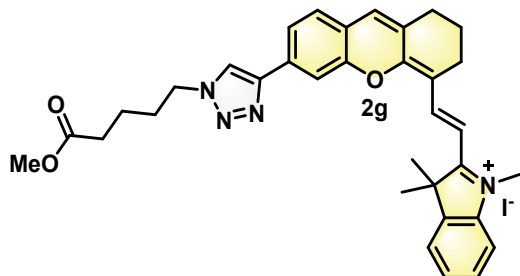

**2g**: 68 mg, 67% yield; dark blue solid; m.p 84-86 °C;  $^1\text{H}$  NMR (400 MHz,  $\text{CD}_3\text{OD}$ ):  $\delta$  = 8.73 (d,  $J$  = 15.2 Hz, 1 H), 8.65 (s, 1 H), 7.85 (s, 1 H), 7.71 (m, 2 H), 7.63-7.47 (m, 4 H), 7.27 (s, 1 H), 6.55 (d,  $J$  = 15.2 Hz, 1 H), 4.49 (t,  $J$  = 7.0 Hz, 2 H), 3.90 (s, 3 H), 3.66 (s, 3 H), 2.76 (t,  $J$  = 6.0 Hz, 2 H), 2.67 (t,  $J$  = 6.1 Hz, 2 H), 2.42 (t,  $J$  = 7.3 Hz, 2 H), 2.06-1.96 (m, 2 H), 1.95-1.88 (m, 2 H), 1.85 (s, 6 H), 1.69-1.63 (m, 2H) ppm;  $^{13}\text{C}$  NMR (101 MHz,  $\text{CD}_3\text{OD}$ ):  $\delta$  = 180.4, 175.3, 165.2, 161.2, 154.4, 147.2, 147.1, 143.6, 143.5, 135.0, 132.7, 131.6, 130.2, 129.4, 128.9, 123.7, 123.6, 123.0, 116.0, 114.3, 112.9, 106.7, 52.3, 52.1, 51.2, 33.9, 33.4, 30.6, 30.3, 28.2, 24.9, 22.9, 21.4 ppm; HRMS (ESI<sup>+</sup>):  $m/z$  549.2874 [ $\text{M}$ ]<sup>+</sup>, calcd for  $\text{C}_{34}\text{H}_{37}\text{N}_4\text{O}_3^+$  549.2860; HPLC (system A):  $t_R$  = 4.9 min (purity 97% at 260 nm and 99% at 600 nm); LRMS (ESI<sup>+</sup>, recorded during RP-HPLC analysis):  $m/z$  549.4 (100) and 550.5 (25) [ $\text{M}$ ]<sup>+</sup>, calcd for  $\text{C}_{34}\text{H}_{37}\text{N}_4\text{O}_3^+$  549.3; UV-vis (recorded during the HPLC analysis):  $\lambda_{\text{max}}$  = 569, 601 and 647 nm (broad band).

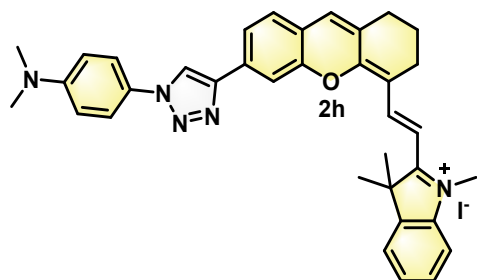

**2h**: 37 mg, 36% yield; dark blue solid; m.p 191-193 °C;  $^1\text{H}$  NMR (400 MHz,  $\text{DMSO}-d_6$ )  $\delta$  9.30 (s, 1 H), 8.65 (d,  $J = 15.5$  Hz, 1 H), 7.95 (s, 1 H), 7.86-7.78 (m, 2 H), 7.74-7.65 (m, 4 H), 7.57-7.49 (m, 2 H), 7.44 (s, 1 H), 6.90 (d,  $J = 8.6$  Hz, 2 H), 6.66 (d,  $J = 15.3$  Hz, 1 H), 3.93 (s, 3 H), 3.00 (s, 6 H), 2.80 – 2.73 (m, 2 H), 2.73 – 2.67 (m, 2 H), 1.93 – 1.85 (m, 2 H), 1.81 (s, 6 H);  $^{13}\text{C}$  NMR (101 MHz,  $\text{DMSO}-d_6$ ):  $\delta = 178.4, 159.0, 152.6, 150.4, 145.4, 144.9, 142.2, 142.1, 133.4, 131.0, 129.9, 128.8, 128.2, 127.5, 125.8, 122.6, 122.2, 121.3, 121.2, 120.4, 114.2, 113.6, 112.2, 111.3, 106.2, 50.6, 32.9, 28.7, 27.1, 23.5, 19.8$  ppm; HRMS (ESI $^{+}$ ):  $m/z$  554.2912  $[\text{M}]^{+\bullet}$ , calcd for  $\text{C}_{36}\text{H}_{36}\text{N}_5\text{O}^{+} [\text{M}]^{+\bullet}$  554.2914; HPLC (system A):  $t_R = 5.4$  min (purity 82% at 260 nm and 85% at 600 nm); LRMS (ESI $^{+}$ , recorded during RP-HPLC analysis):  $m/z$  554.2  $[\text{M}]^{+\bullet}$  (100), calcd for  $\text{C}_{36}\text{H}_{36}\text{N}_5\text{O}^{+}$  554.3; UV-vis (recorded during the HPLC analysis):  $\lambda_{\text{max}} = 572, 604$  and 650 nm (broad band).

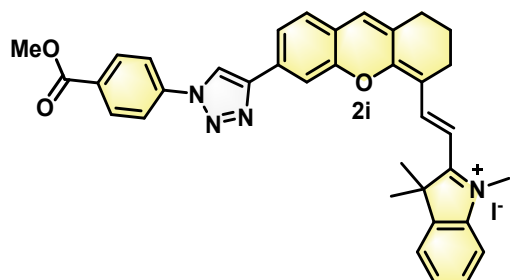

**2i**: 23 mg, 22% yield; dark blue solid; m.p 176-178 °C;  $^1\text{H}$  NMR (400 MHz,  $\text{DMSO}-d_6$ ):  $\delta = 9.63$  (s, 1 H), 8.61 (d,  $J = 15.2$  Hz, 1 H), 8.48 (s, 1 H), 8.30-8.22 (m, 1 H), 8.10 (d,  $J = 7.8$  Hz, 1 H), 7.93 (s, 1 H), 7.83 (dt,  $J = 13.9$  Hz,  $J = 7.7$  Hz, 3 H), 7.72 (d,  $J = 7.9$  Hz, 1 H), 7.65 (d,  $J = 8.0$  Hz, 1 H), 7.54 (m, 2 H), 7.42 (s, 1 H), 6.63 (d,  $J = 15.2$  Hz, 1 H), 3.94 (s, 3 H), 3.92 (s, 3 H), 2.75 (t,  $J = 6.0$  Hz, 2 H), 2.67 (t,  $J = 5.7$  Hz, 2 H), 1.90-1.85 (m, 2 H), 1.82 (s, 6 H) ppm;  $^{13}\text{C}$  NMR (101 MHz,  $\text{DMSO}-d_6$ ):  $\delta = 178.5, 165.2, 158.8, 152.6, 146.1, 144.9, 142.2, 142.1, 136.6, 132.8, 131.3, 130.8, 130.7, 130.1, 129.2, 128.8, 128.2, 127.6, 124.4, 122.6, 122.3, 121.5, 121.1, 120.0, 114.2, 113.6, 111.5, 106.4, 52.6, 50.7, 33.0, 28.7, 27.1, 23.5, 19.8$  ppm; HRMS (ESI $^{+}$ ):  $m/z$  569.2550  $[\text{M}]^{+\bullet}$ , calcd for  $\text{C}_{36}\text{H}_{33}\text{N}_4\text{O}_3^{+}$  569.2547; HPLC (system A):  $t_R = 5.3$  min (purity 94% at 260 nm and 96% at 600 nm); LRMS (ESI $^{+}$ , recorded during RP-HPLC analysis):  $m/z$  569.4 (100) and 570.4 (30)  $[\text{M}]^{+\bullet}$ , calcd for  $\text{C}_{36}\text{H}_{33}\text{N}_4\text{O}_3^{+}$  569.2; UV-vis (recorded during the HPLC analysis):  $\lambda_{\text{max}} = 568, 601$  and 646 nm (broad band).

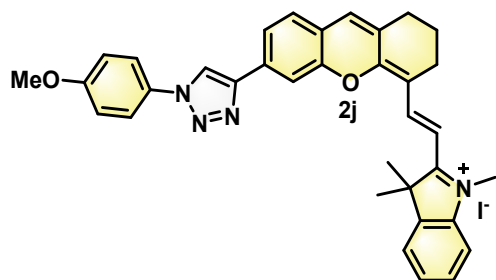

**2j**: 80 mg, 80% yield; dark blue solid; m.p 225-227 °C;  $^1\text{H}$  NMR (400 MHz,  $\text{DMSO-}d_6$ ):  $\delta$  = 9.37 (s, 1 H), 8.61-8.51 (m, 1 H), 7.88-7.86 (m, 1 H), 7.85 (s, 1 H), 7.84-7.76 (m, 3 H), 7.73-7.68 (m, 1 H), 7.62 (m, 1 H), 7.59-7.46 (m, 2 H), 7.40 (s, 1 H), 7.21-7.14 (m, 2 H), 6.58 (d,  $J$  = 15.2 Hz, 1 H), 3.89 (s, 3 H), 3.85 (s, 3 H), 2.73 (t,  $J$  = 6.1 Hz, 2 H), 2.64 (m, 2 H), 1.89-1.84 (m, 2 H), 1.80 (s, 6 H) ppm;  $^{13}\text{C}$  NMR (101 MHz,  $\text{DMSO-}d_6$ ):  $\delta$  = 178.4, 159.4, 158.9, 152.6, 145.7, 144.9, 142.2, 142.1, 133.1, 130.9, 130.0, 129.8, 128.8, 128.2, 127.6, 122.6, 122.2, 121.7, 121.4, 120.8, 114.9, 114.2, 113.6, 111.4, 106.3, 55.6, 50.6, 33.0, 28.7, 27.1, 23.5, 19.8 ppm; HRMS (ESI $^{+}$ ):  $m/z$  541.2603  $[\text{M}]^{+\bullet}$ , calcd for  $\text{C}_{35}\text{H}_{33}\text{N}_4\text{O}_2^{+}$  541.2598; HPLC (system A):  $t_R$  = 5.3 min (purity 98% at 260 nm and 99% at 600 nm); LRMS (ESI $^{+}$ , recorded during RP-HPLC analysis):  $m/z$  541.3 (100) and 542.5 (30)  $[\text{M}]^{+\bullet}$ , calcd for  $\text{C}_{35}\text{H}_{33}\text{N}_4\text{O}_2^{+}$  541.2; UV-vis (recorded during the HPLC analysis):  $\lambda_{\text{max}}$  = 570, 602 and 648 nm (broad band). **Note**: we found that dye **2j** was contaminated by a small quantity of 3,4-dihydroxy-2-oxobutanoic acid coming from the CuAAC reaction and which we estimated to be 1.6% by integration by  $^1\text{H}$  NMR analysis.

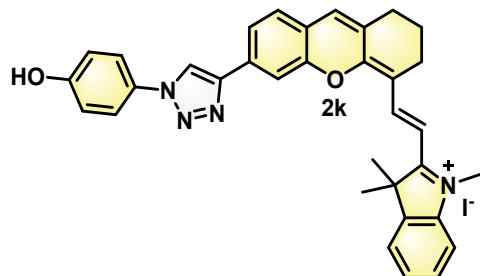

**2k**: 40 mg, 41% yield; dark blue solid; m.p 227-229 °C;  $^1\text{H}$  NMR (400 MHz,  $\text{DMSO-}d_6$ ):  $\delta$  = 10.06 (s, 1 H), 9.32 (s, 1 H), 8.58 (d,  $J$  = 15.2 Hz, 1 H), 7.88 (s, 1 H), 7.85-7.76 (m, 2 H), 7.74-7.68 (m, 3 H), 7.65-7.47 (m, 3 H), 7.40 (s, 1 H), 7.02-6.96 (m, 2 H), 6.59 (d,  $J$  = 15.3 Hz, 1 H), 3.90 (s, 3 H), 2.73 (t,  $J$  = 6.0 Hz, 2 H), 2.63 (m, 2 H), 1.87-1.81 (m, 2 H), 1.81 (s, 6 H) ppm;  $^{13}\text{C}$  NMR (101 MHz,  $\text{DMSO-}d_6$ ):  $\delta$  = 178.5, 158.9, 158.0, 152.6, 145.6, 144.9, 142.2, 142.2, 133.2, 131.0, 130.0, 128.8, 128.5, 128.2, 127.6, 122.6, 122.2, 121.9, 121.3, 120.8, 116.1, 114.2, 113.6, 111.4, 106.3, 50.6, 33.0, 28.7, 27.1, 23.5, 19.8 ppm; HRMS (ESI $^{+}$ ):  $m/z$  527.2437  $[\text{M}]^{+\bullet}$ , calcd for  $\text{C}_{34}\text{H}_{31}\text{N}_4\text{O}_2^{+}$  527.2442; HPLC (system A):  $t_R$  = 4.9 min (purity 97% at 260 nm and 99% at 600 nm); HPLC (system B):  $t_R$  = 5.1 min (purity 96% at 260 nm and 99% at 600 nm); LRMS (ESI $^{+}$ , recorded during RP-HPLC analysis):  $m/z$  527.2 (100) and 528.4 (40)  $[\text{M}]^{+\bullet}$ , calcd for  $\text{C}_{34}\text{H}_{31}\text{N}_4\text{O}_2^{+}$  527.2; LRMS (ESI $^{-}$ , recorded during RP-HPLC analysis):  $m/z$  525.2 (100)  $[\text{M}^{+} - 2\text{H}]^{-}$  and 571.2 (60)  $[\text{M}^{+} - 2\text{H} + \text{FA}]^{-}$ , calcd for  $\text{C}_{34}\text{H}_{29}\text{N}_4\text{O}_2^{-}$  525.2; UV-vis (recorded during the HPLC analysis):  $\lambda_{\text{max}}$  = 569, 602 and 647 nm (broad band).

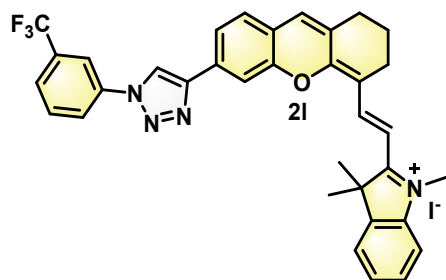

**2l:** 45 mg, 43% yield; dark blue solid; m.p 63-65 °C;  $^1\text{H}$  NMR (400 MHz,  $\text{DMSO}-d_6$ ):  $\delta$  = 9.64 (s, 1 H), 8.58 (d,  $J$  = 15.3 Hz, 1 H), 8.35-8.27 (m, 2 H), 7.94-7.90 (m, 2 H), 7.89 (s, 1 H), 7.80 (ddd,  $J$  = 7.1 Hz,  $J$  = 5.9 Hz,  $J$  = 1.4 Hz, 2 H), 7.73-7.69 (m, 1 H), 7.65 (d,  $J$  = 8.1 Hz, 1 H), 7.53 (m, 2 H), 7.40 (s, 1 H), 6.60 (d,  $J$  = 15.3 Hz, 1 H), 3.91 (s, 3 H), 2.74 (t,  $J$  = 5.9 Hz, 2 H), 2.65 (t,  $J$  = 6.0 Hz, 2 H), 1.89-1.84 (m, 2 H), 1.81 (s, 6 H) ppm;  $^{13}\text{C}$  NMR (101 MHz,  $\text{DMSO}-d_6$ ):  $\delta$  = 178.6, 158.8, 152.6, 146.1, 144.9, 142.3, 142.1, 136.9, 132.7, 131.5, 130.7, 130.6 (q,  $J$  = 32.8 Hz), 130.4, 130.2, 128.8, 128.3, 127.6, 125.5 (q,  $J$  = 3.6 Hz), 124.0, 123.6 (q,  $J$  = 273.7 Hz), 122.6, 122.3, 121.6, 121.3, 116.6, 116.6 (q,  $J$  = 3.9 Hz), 114.2, 113.6, 111.5, 106.5, 50.7, 33.0, 28.7, 27.0, 23.6, 19.8 ppm;  $^{19}\text{F}$  NMR (376 MHz,  $\text{DMSO}-d_6$ ):  $\delta$  = -61.2 (s, 3 F); HRMS (ESI<sup>+</sup>):  $m/z$  579.2363 [ $\text{M}$ ]<sup>+</sup>, calcd for  $\text{C}_{35}\text{H}_{30}\text{F}_3\text{N}_4\text{O}^+$  579.2366; HPLC (system A):  $t_R$  = 5.5 min (purity 98% at 260 nm and 100% at 600 nm); LRMS (ESI<sup>+</sup>, recorded during RP-HPLC analysis):  $m/z$  579.4 (100) and 580.5 (35) [ $\text{M}$ ]<sup>+</sup>, calcd for  $\text{C}_{35}\text{H}_{30}\text{F}_3\text{N}_4\text{O}^+$  579.2; UV-vis (recorded during the HPLC analysis):  $\lambda_{\text{max}}$  = 568, 601 and 645 nm (broad band). **Note:** we found that dye **2l** was contaminated by a small quantity of 3,4-dihydroxy-2-oxobutanoic acid coming from the CuAAC reaction and which we estimated to be 2.8% by integration by  $^1\text{H}$  NMR analysis.

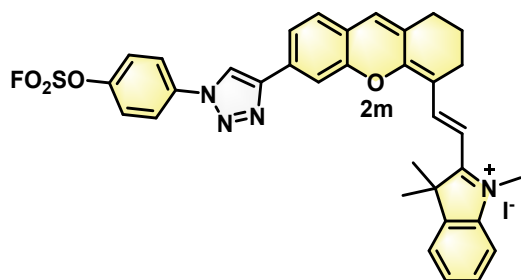

**2m:** 53 mg, 48% yield; dark blue solid; m.p 173-175 °C;  $^1\text{H}$  NMR (400 MHz,  $\text{DMSO}-d_6$ ):  $\delta$  = 9.54 (s, 1 H), 8.57 (d,  $J$  = 15.3 Hz, 1 H), 8.20-8.13 (m, 2 H), 7.9-7.90 (m, 2 H), 7.86 (s, 1 H), 7.79 (m, 2 H), 7.71 (d,  $J$  = 7.8 Hz, 1 H), 7.64 (d,  $J$  = 8.0 Hz, 1 H), 7.59-7.47 (m, 2 H), 7.40 (s, 1 H), 6.59 (d,  $J$  = 15.1 Hz, 1 H), 3.90 (s, 3 H), 2.73 (t,  $J$  = 5.8 Hz, 2 H), 2.63 (t,  $J$  = 6.1 Hz, 2 H), 1.88-1.82 (m, 2 H), 1.81 (s, 6 H) ppm;  $^{13}\text{C}$  NMR (101 MHz,  $\text{DMSO}-d_6$ ):  $\delta$  = 178.5, 158.7, 152.6, 148.9, 146.1, 144.9, 142.2, 142.1, 136.5, 132.4, 130.7, 130.22, 128.8, 128.3, 127.6, 123.1, 122.6, 122.3, 121.6, 121.3, 114.2, 113.6, 111.5, 106.4, 50.7, 33.0, 28.7, 27.0, 23.5, 19.8 ppm;  $^{19}\text{F}$  NMR (377 MHz,  $\text{DMSO}-d_6$ ):  $\delta$  = 39.1 (s, 1 F); HRMS (ESI<sup>+</sup>):  $m/z$  609.1977 [ $\text{M}$ ]<sup>+</sup>, calcd for  $\text{C}_{34}\text{H}_{30}\text{FN}_4\text{O}_4\text{S}^+$  609.1966; HPLC (system A):  $t_R$  = 5.4 min (purity 96% at 260 nm and 98% at 600 nm); LRMS (ESI<sup>+</sup>, recorded during RP-HPLC analysis):  $m/z$  609.4 (100) and 610.3 (30) [ $\text{M}$ ]<sup>+</sup>, calcd for  $\text{C}_{34}\text{H}_{30}\text{FN}_4\text{O}_4\text{S}^+$  609.2; LRMS (ESI<sup>-</sup>, recorded during



RP-HPLC analysis):  $m/z$  653.3 (90)  $[M^+ - 2H + FA]^-$ , calcd for  $C_{34}H_{29}FN_4O_4S^-$  607.2; UV-vis (recorded during the HPLC analysis):  $\lambda_{max}$  = 567, 601 and 645 nm (broad band).

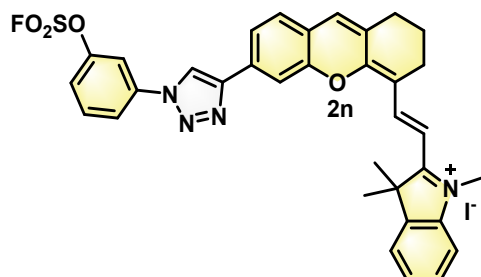

**2n**: 22 mg, 20% yield; dark blue solid; m.p 223-225 °C;  $^1H$  NMR (400 MHz,  $DMSO-d_6$ ):  $\delta$  = 9.54 (s, 1 H), 8.58 (d,  $J$  = 15.2 Hz, 1 H), 8.26 (t,  $J$  = 2.2 Hz, 1 H), 8.14 (m, 1 H), 7.88 (d,  $J$  = 8.4 Hz, 1 H), 7.87 (s, 1 H), 7.83-7.75 (m, 3 H), 7.73-7.69 (m, 1 H), 7.64 (d,  $J$  = 8.0 Hz, 1 H), 7.53 (m, 2 H), 7.39 (s, 1 H), 6.60 (d,  $J$  = 15.2 Hz, 1 H), 3.90 (s, 3 H), 2.73 (t,  $J$  = 6.0 Hz, 2 H), 2.64 (t,  $J$  = 6.1 Hz, 2 H), 1.89-1.82 (m, 2 H), 1.81 (s, 6 H) ppm;  $^{13}C$  NMR (101 MHz,  $DMSO-d_6$ ):  $\delta$  = 178.6, 158.7, 152.6, 149.8, 146.2, 144.9, 142.2, 142.1, 137.7, 132.5, 132.5, 130.7, 130.3, 128.8, 128.3, 127.6, 122.6, 122.3, 121.6, 121.4, 121.2, 120.5, 114.2, 113.6, 113.2, 111.5, 106.5, 50.7, 33.0, 28.7, 27.0, 23.5, 19.8 ppm;  $^{19}F$  NMR (377 MHz,  $CD_3OD$ ):  $\delta$  = 36.6 (s, 1 F) ppm; HRMS (ESI<sup>+</sup>):  $m/z$  609.1983  $[M]^+$ , calcd for  $C_{34}H_{30}FN_4O_4S^+$  609.1966; HPLC (system A):  $t_R$  = 5.4 min (purity 97% at 260 nm and 99% at 600 nm); LRMS (ESI<sup>+</sup>, recorded during RP-HPLC analysis):  $m/z$  609.4 (100) and 610.3 (40)  $[M]^+$ , calcd for  $C_{34}H_{30}FN_4O_4S^+$  609.2; LRMS (ESI<sup>-</sup>, recorded during RP-HPLC analysis):  $m/z$  653.4 (100)  $[M^+ - 2H + FA]^-$ , calcd for  $C_{34}H_{29}FN_4O_4S^-$  607.2; UV-vis (recorded during the HPLC analysis):  $\lambda_{max}$  = 568, 601 and 645 nm (broad band).

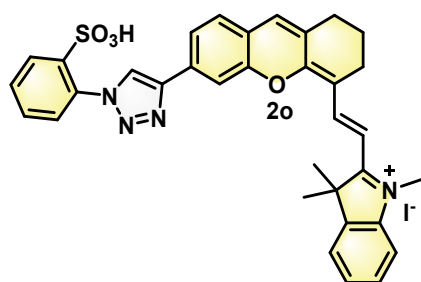

**2o**: 15 mg, 14% yield; m.p. 235-237 °C;  $^1H$  NMR (600 MHz,  $DMSO-d_6$ )  $\delta$  9.23 (s, 1H), 8.65 (d,  $J$  = 14.9 Hz, 1H), 8.07-7.99 (m, 1H), 7.91 (s, 1H), 7.90 (s, 1H), 7.83-7.78 (m, 3H), 7.71 (d,  $J$  = 8.1 Hz, 1H), 7.65 (d,  $J$  = 8.0 Hz, 1H), 7.61-7.58 (m, 2H), 7.55 (d,  $J$  = 7.9 Hz, 2H), 7.46 (s, 1H), 6.64 (d,  $J$  = 15.2 Hz, 1H), 3.92 (s, 3H), 2.71-2.66 (m, 2H), 2.64 (t,  $J$  = 5.9 Hz, 2H), 1.89-1.83 (m, 2H), 1.81 (s, 6H);  $^{13}C$  NMR (101 MHz,  $DMSO-d_6$ )  $\delta$  178.6, 158.8, 152.7, 149.0, 146.2, 145.0, 142.3, 142.2, 136.5, 132.7, 130.8, 130.3, 128.9, 128.4, 127.7, 123.2, 122.7, 122.4, 121.6, 121.3, 114.3, 113.7, 111.6, 106.5, 50.8, 33.0, 28.8, 27.1, 23.6, 19.8; HPLC (system A):  $t_R$  = 4.7 min (purity 95% at 260 nm and 97% at 600 nm); LRMS (ESI<sup>+</sup>, recorded during RP-HPLC analysis):  $m/z$  563.2 (60),

591.4 (100)  $[M]^+\bullet$  and 1181.7 (15)  $[2M^+ - H]^+\bullet$ , calcd for  $C_{34}H_{31}N_4O_4S^+$  591.7; LRMS (ESI-, recorded during RP-HPLC analysis):  $m/z$  589.3 (100)  $[M^+ - 2H]^-$ , calcd for  $C_{34}H_{29}N_4O_4S^-$  589.78; UV-vis (recorded during the HPLC analysis):  $\lambda_{max} = 569, 602$  and 649 nm (broad band); HRMS (ESI+):  $m/z$  591.2055  $[M]^+\bullet$ , calcd for  $C_{34}H_{31}N_4O_4S^+$  591.2060.

## 4. References

1. G. R. Fulmer, A. J. M. Miller, N. H. Sherden, H. E. Gottlieb, A. Nudelman, B. M. Stoltz, J. E. Bercaw and K. I. Goldberg, *Organometallics*, 2010, **29**, 2176-2179.
2. M. J. H. Ong, R. Srinivasan, A. Romieu and J. A. Richard, *Org. Lett.*, 2016, **18**, 5122-5125.
3. G. Colombano, C. Travelli, U. Galli, A. Caldarelli, G. C. Tron and A. A. Genazzani, *J. Med. Chem.*, 2010, **532**, 616-623.
4. Y. Kim, Y. H. Rhee and J. Park, *Org. Biomol. Chem.*, 2017, **15**, 1636-1641.
5. J. Pietruszka and G. Solduga, *Eur. J. Org. Chem.*, 2009, **34**, 5998-6008.
6. C. Uttamapinant, A. Tangpeerachaikul, S. Grecian, S. Clarke, K. R. Gee and A. Y. Ting, *Angew. Chem. Int. Ed.*, 2012, **51**, 5852-5856.
7. V. Voliani, G. Signore, O. Vittorio, P. Faraci, S. Luin, J. Perez-Prieto and F. Beltram, *J. Mater. Chem. B.*, 2013, **1**, 4225-4230.
8. L. Ren and N. Jiao, *Chem. Commun.*, 2014, **50**, 3706-3709.
9. X. Peng, Q. Wang, Y. Mishra, J. Xu, D. E. Reichert and R. H. Mach, *Bioorg. Med. Chem. Lett.*, 2015, **25**, 519-523.
10. S. F. Sebest, L. Casarrubios, H. S. Rzepa, A. J. P. White and S. Díez-González, *Green Chem.*, 2018, **20**, 4023-4035.
11. B. Christopher, A. Abe, E. Amy, G. Shomir, G. Jianping, H. Geraldine and J. Matthew, *J. Org. Chem.*, 2005, **70**, 10206-10209.

## 5. $^1H$ , $^{19}F$ and $^{13}C$ NMR spectra of synthesised compounds

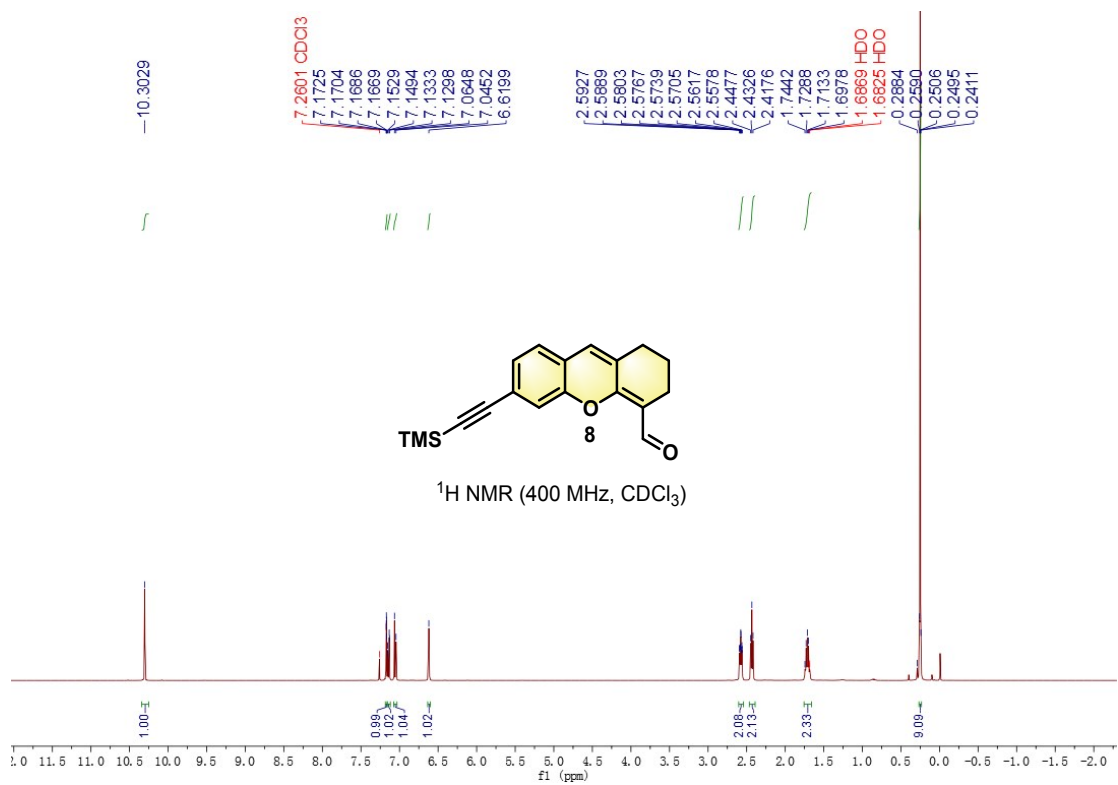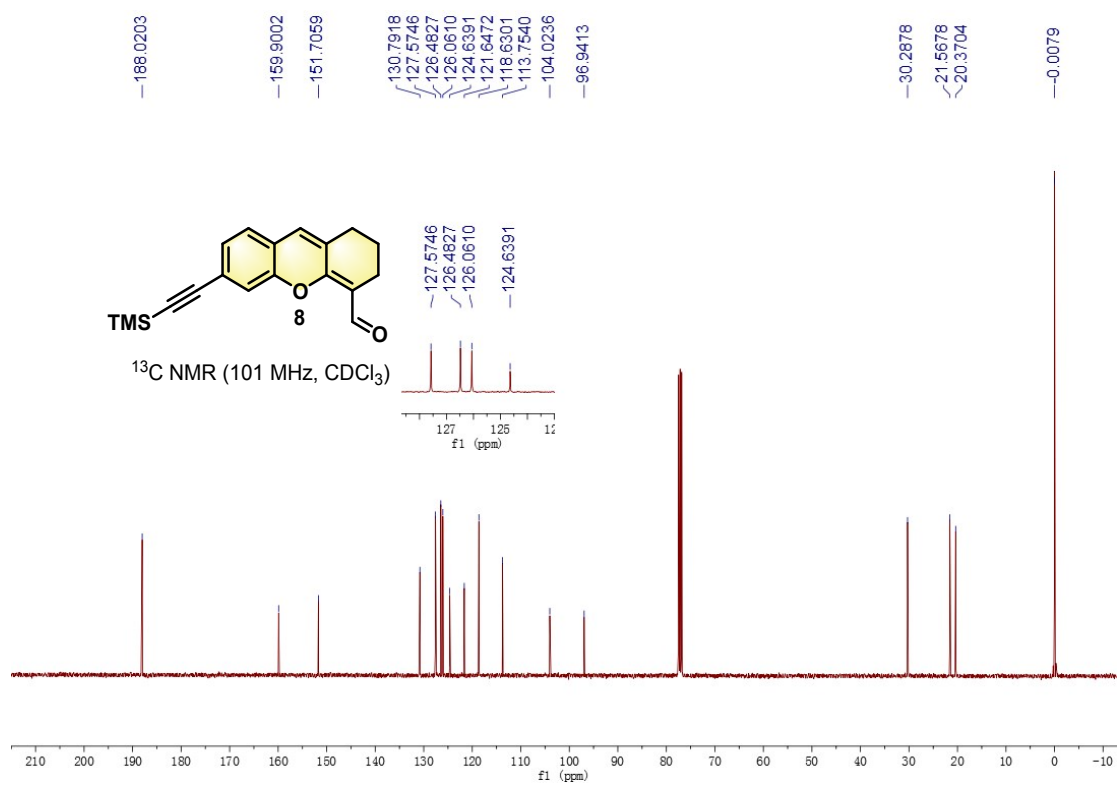

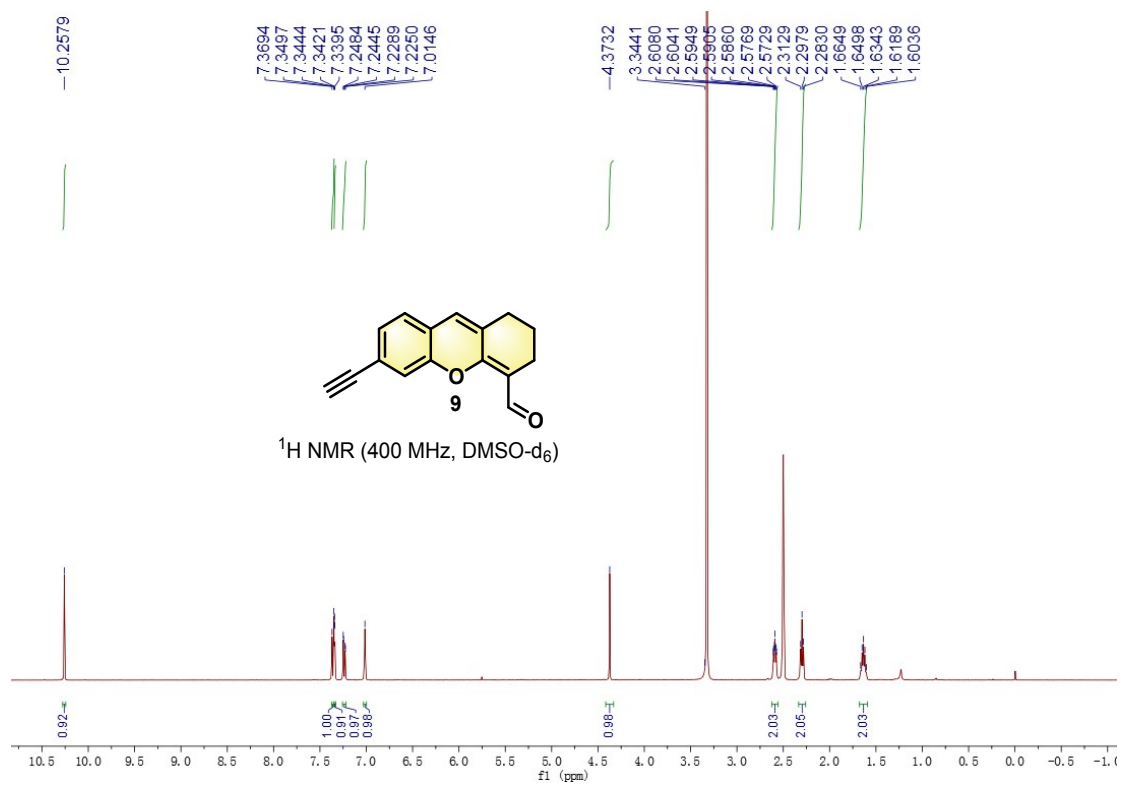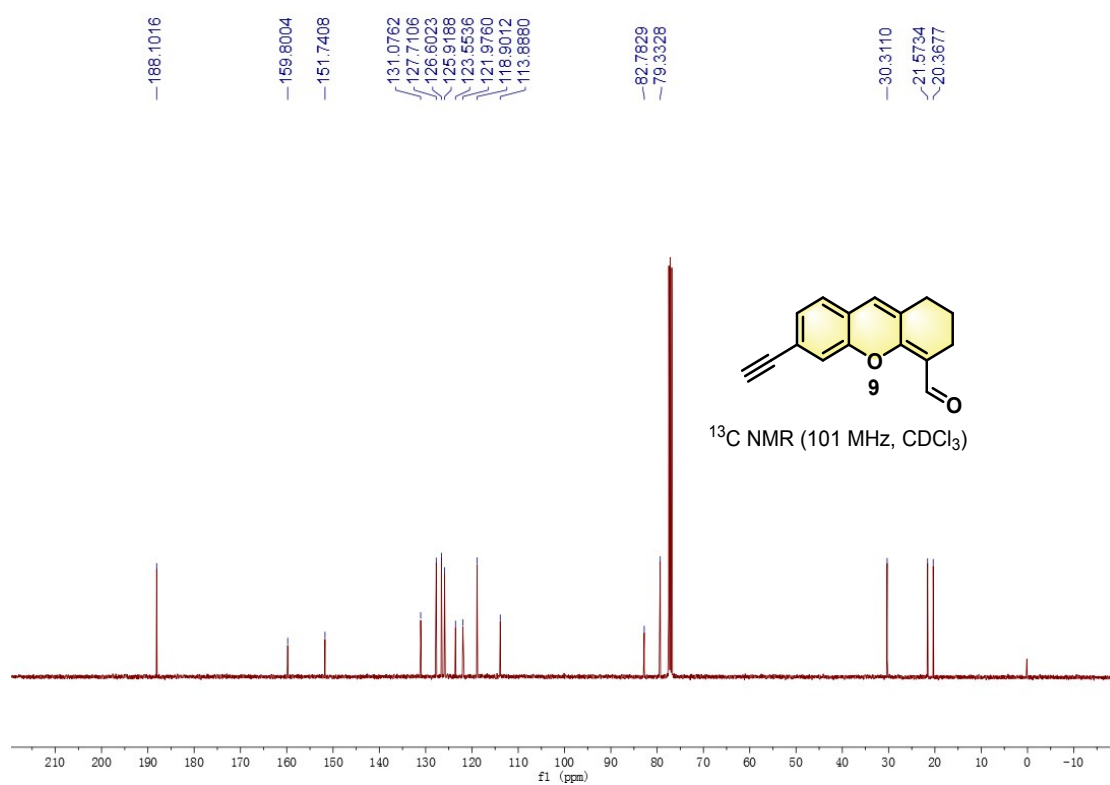

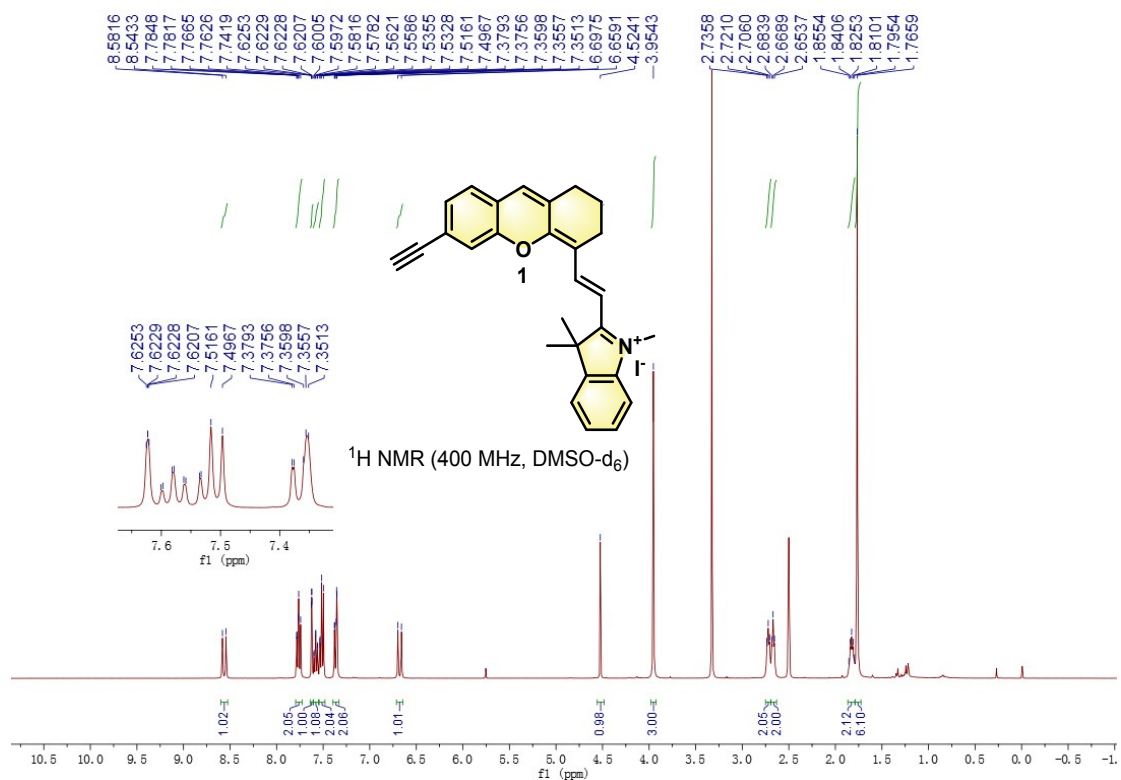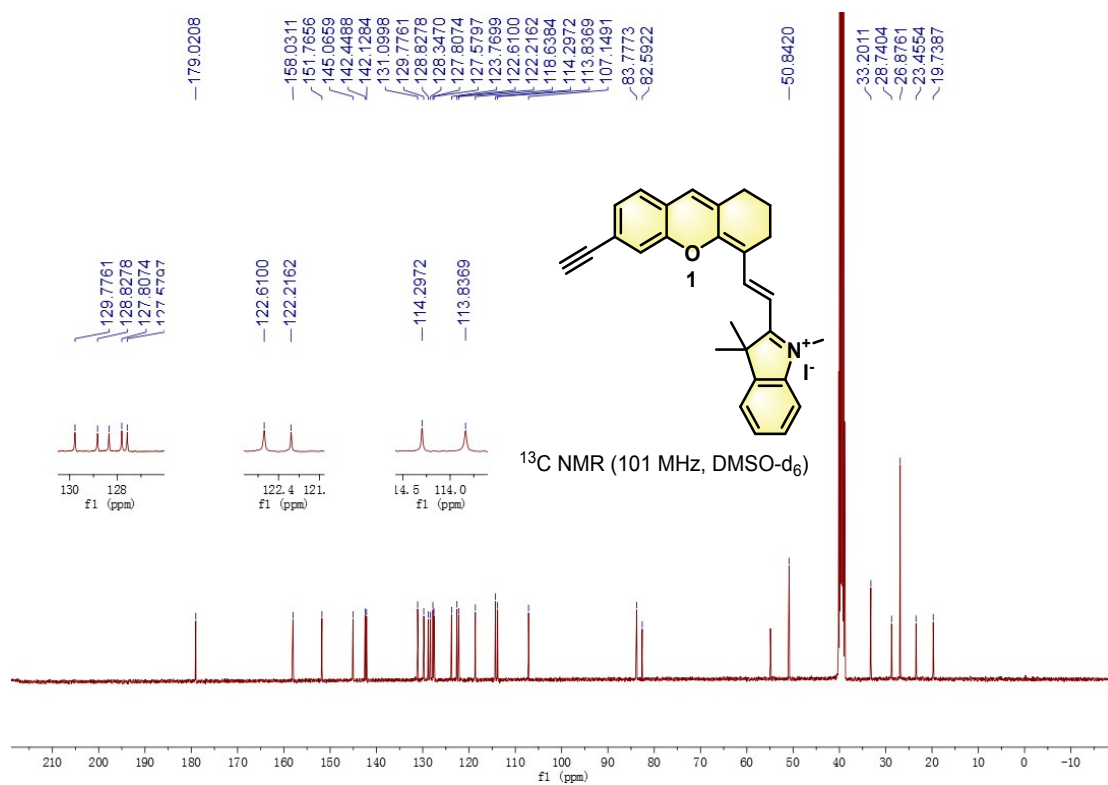

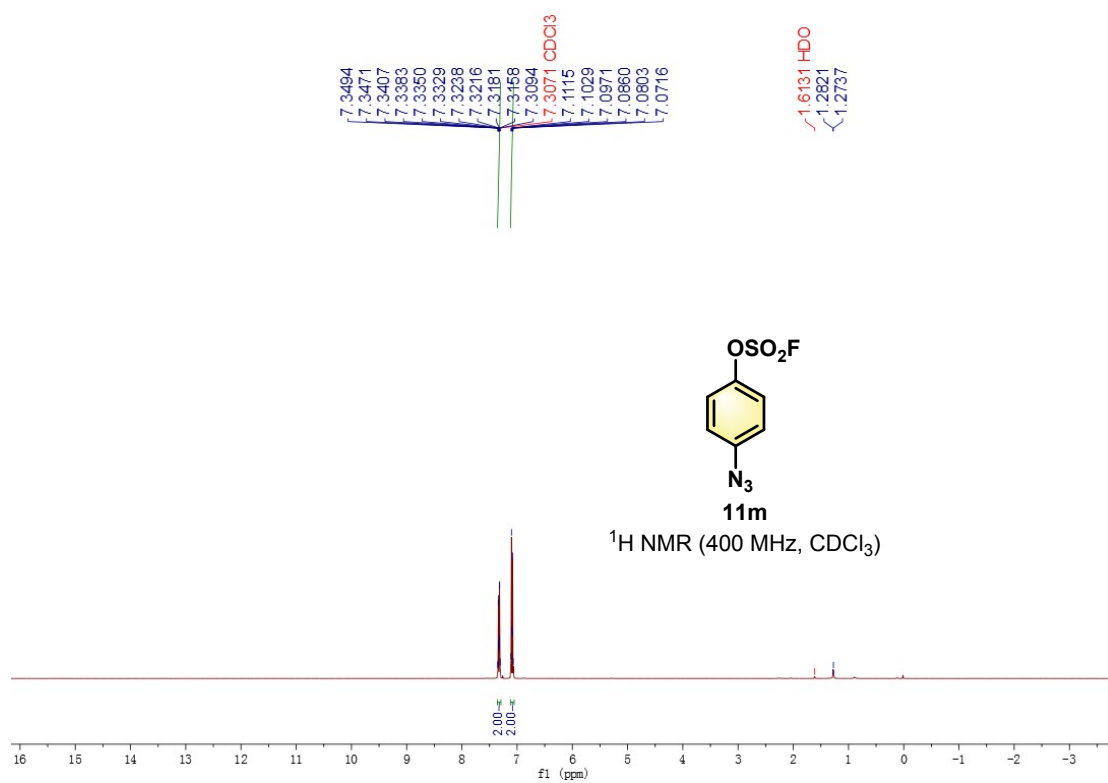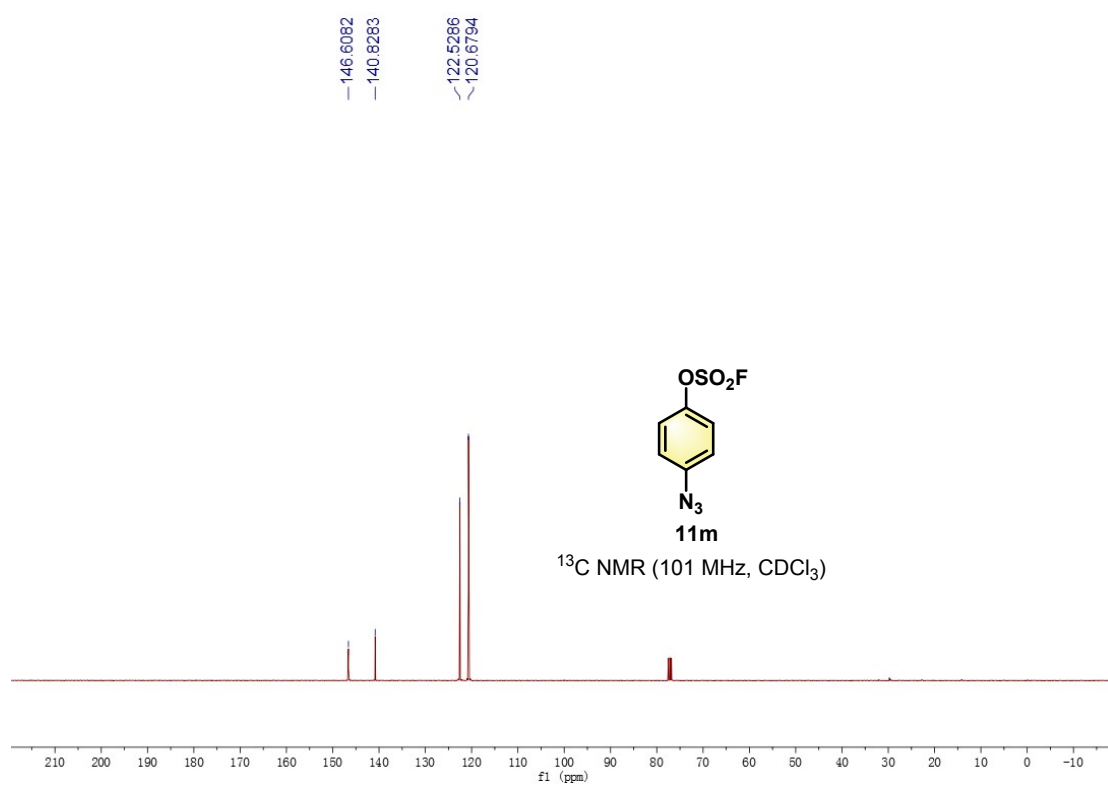

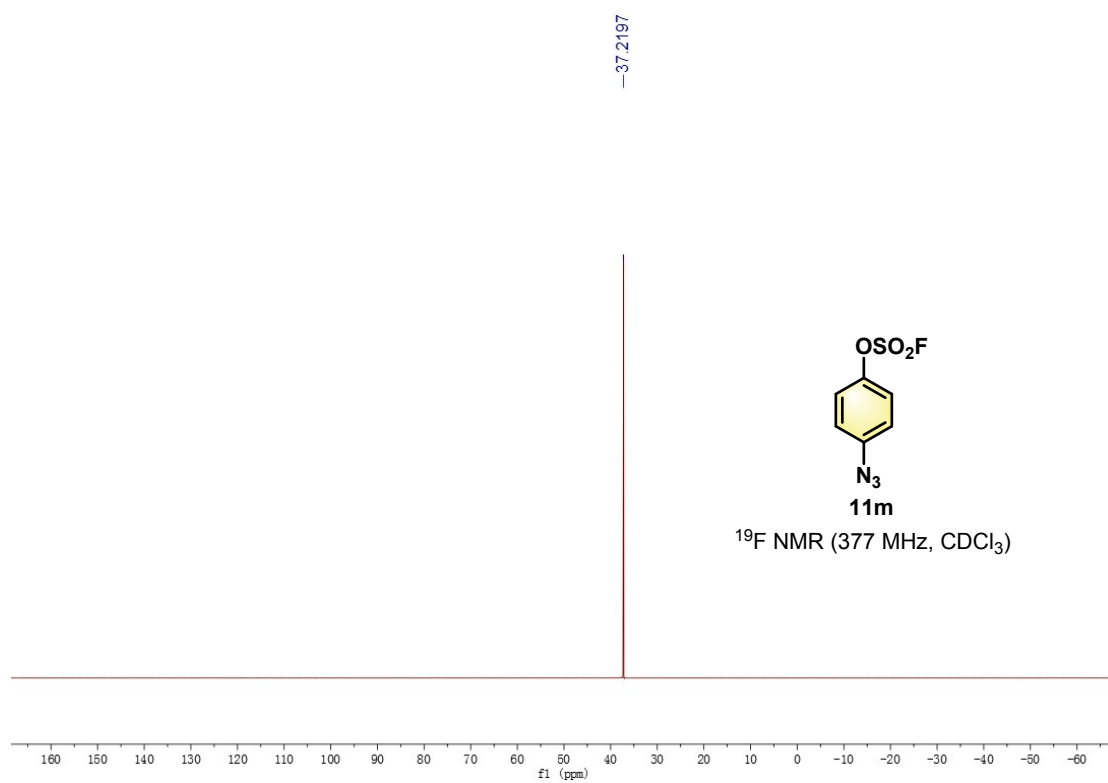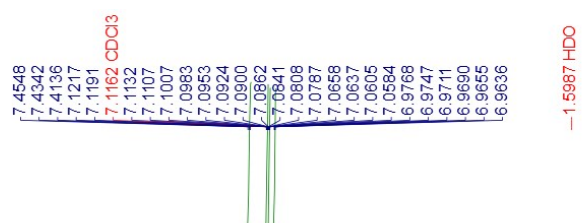

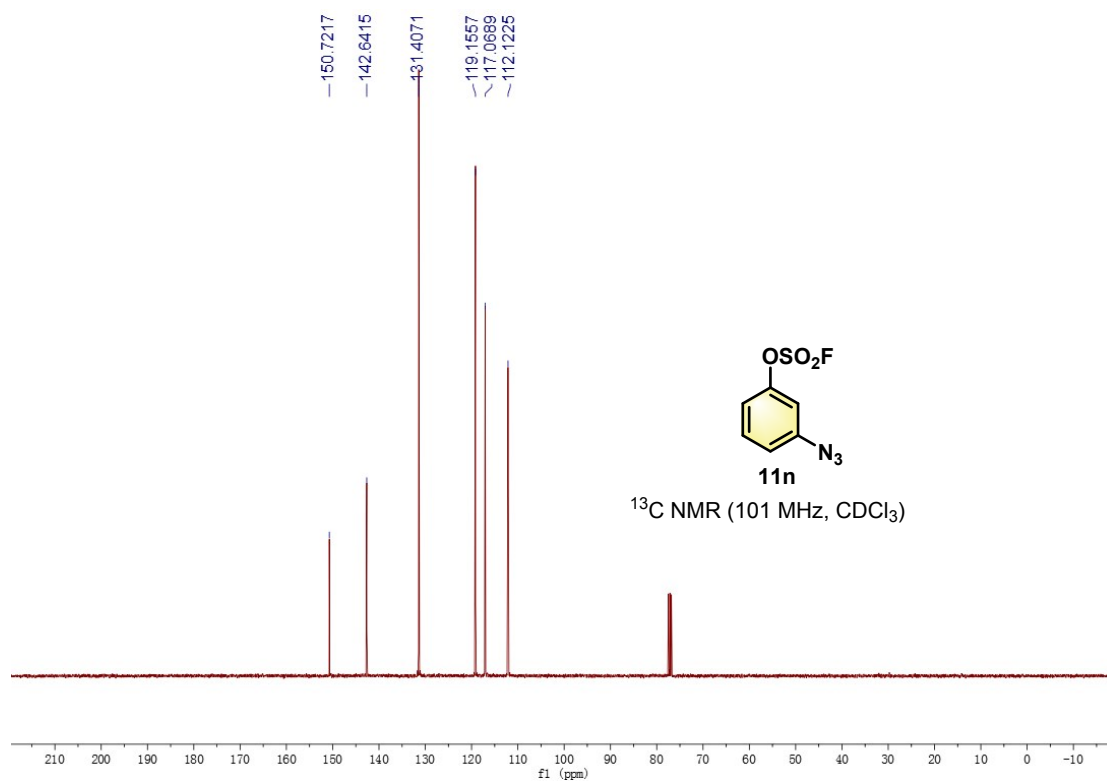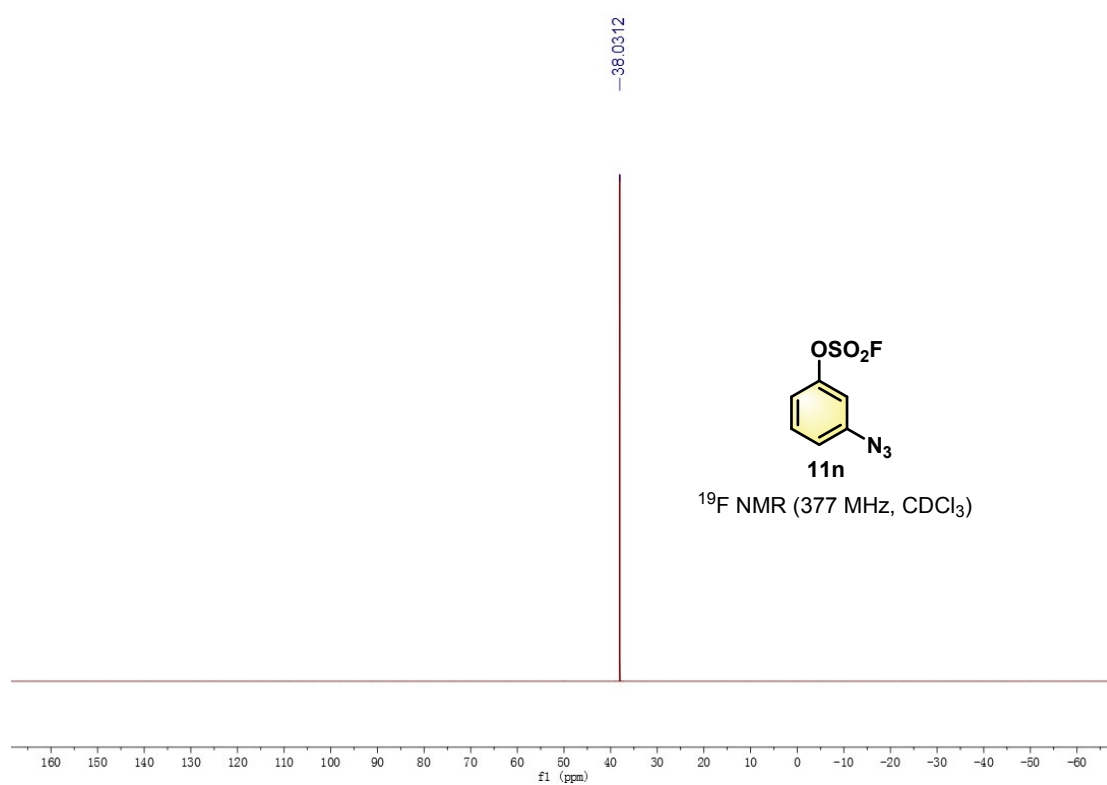



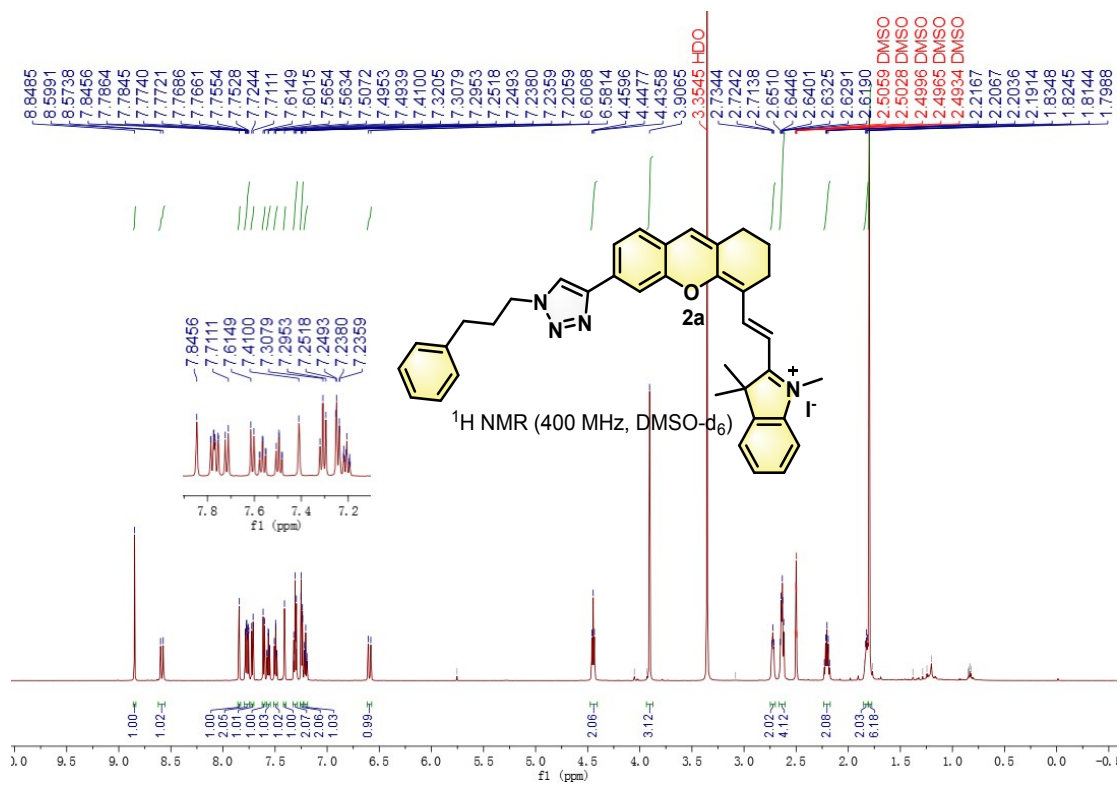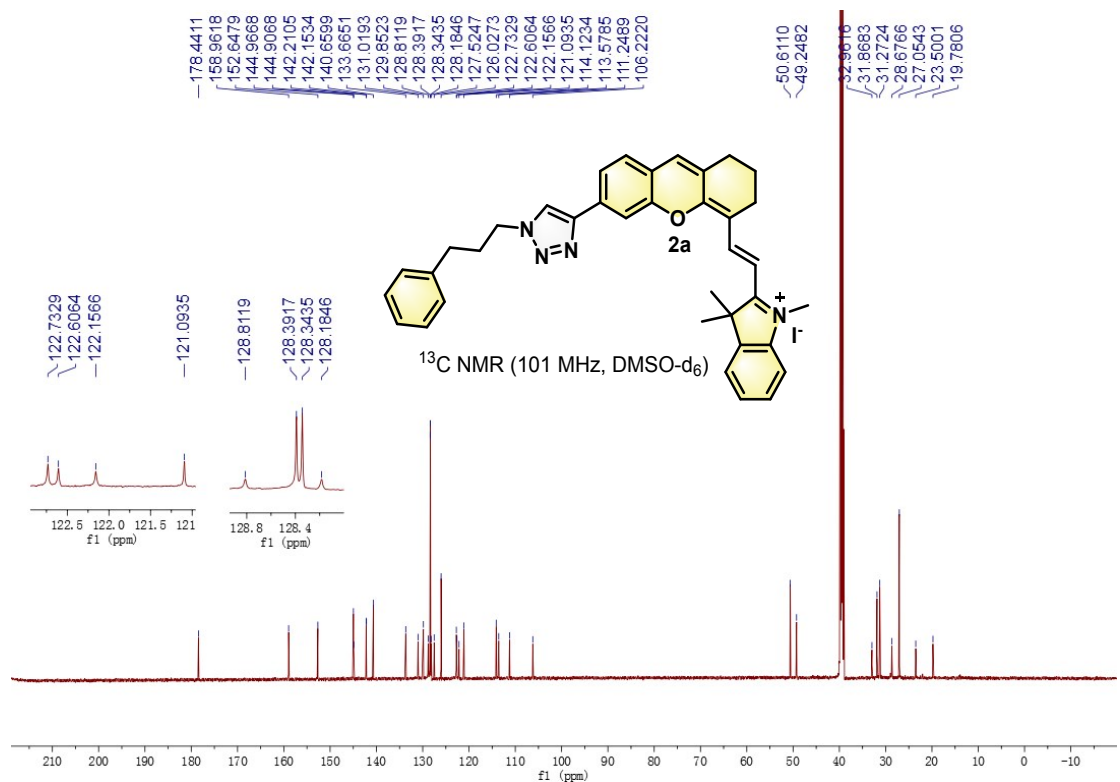

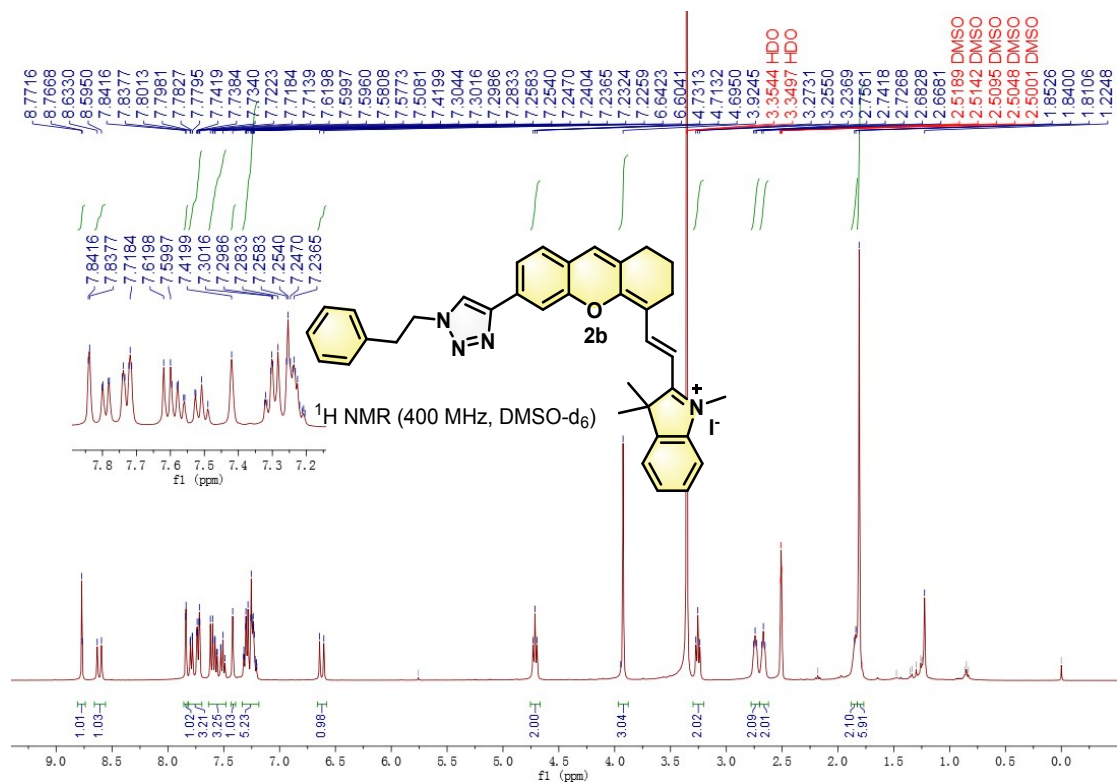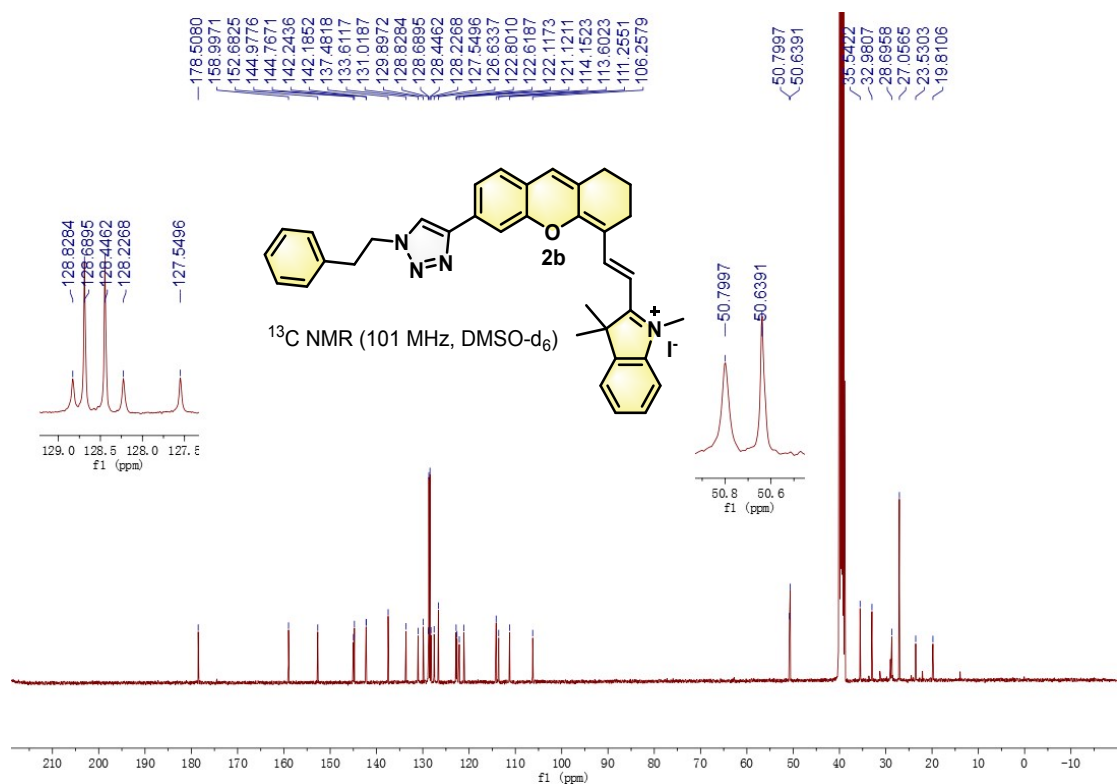

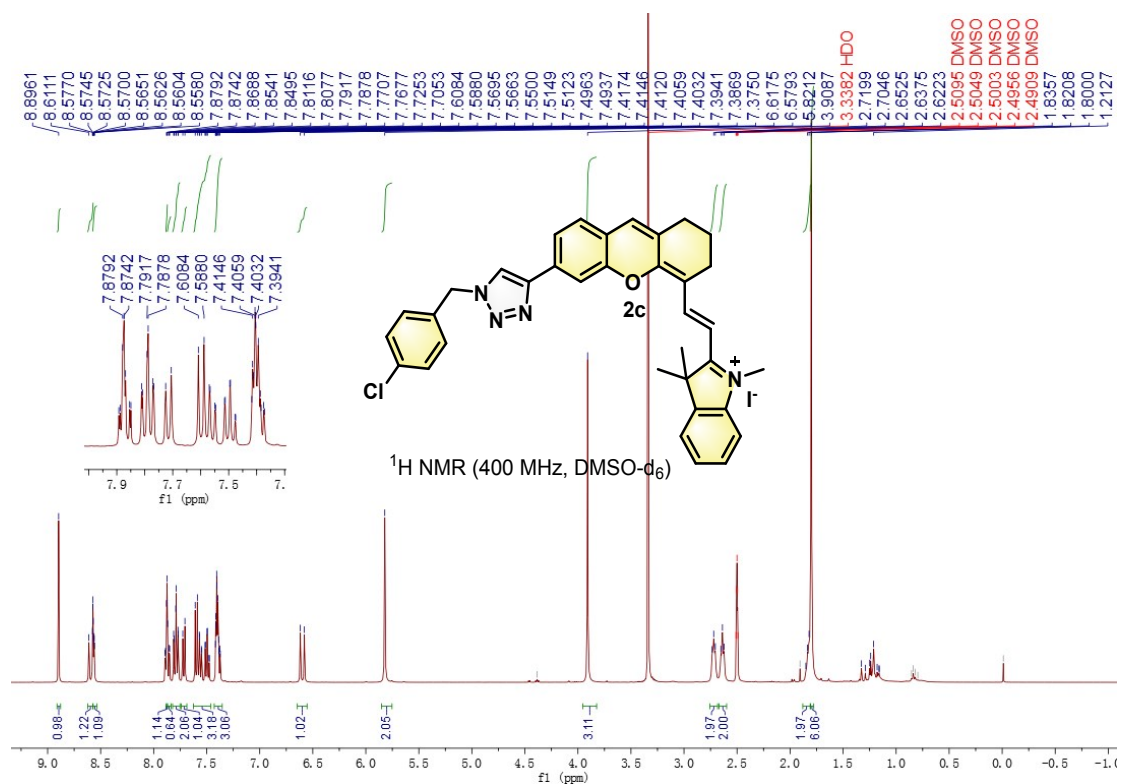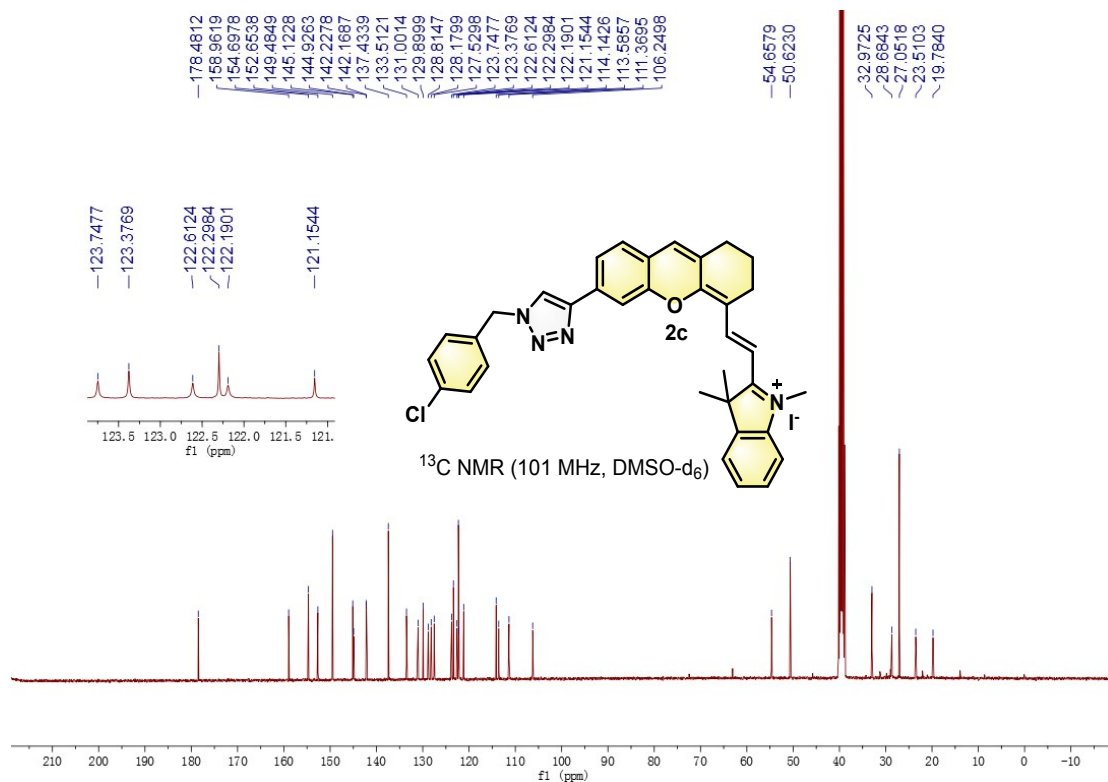

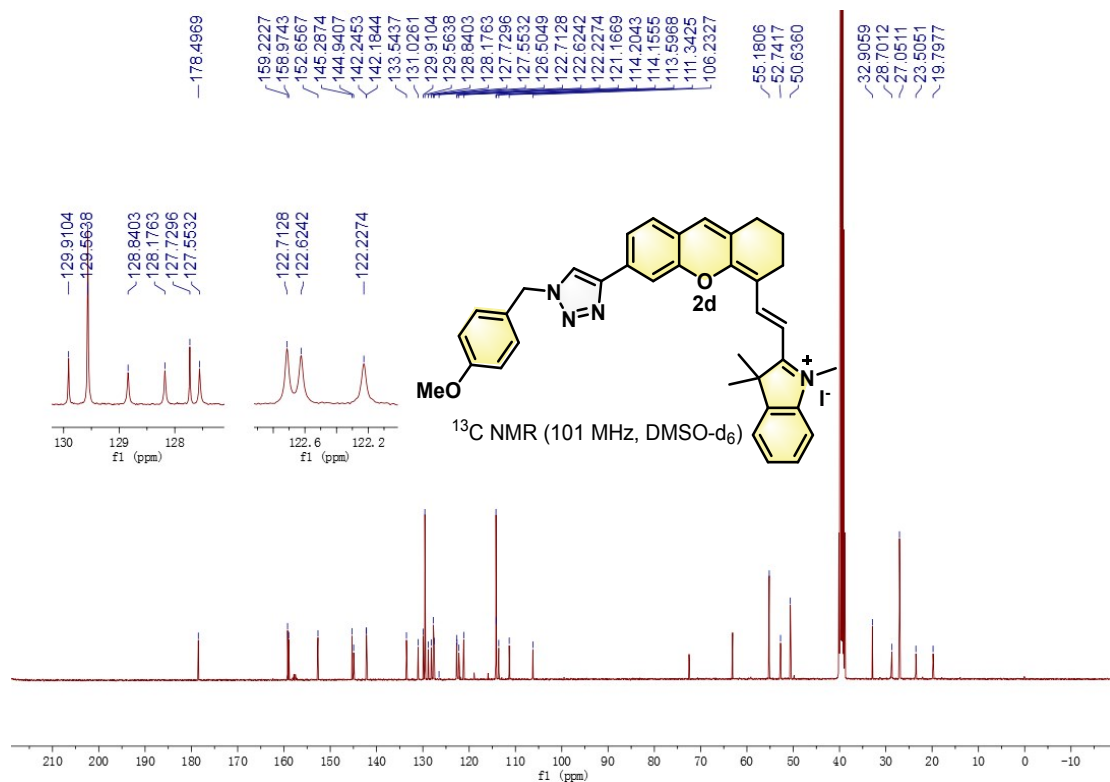

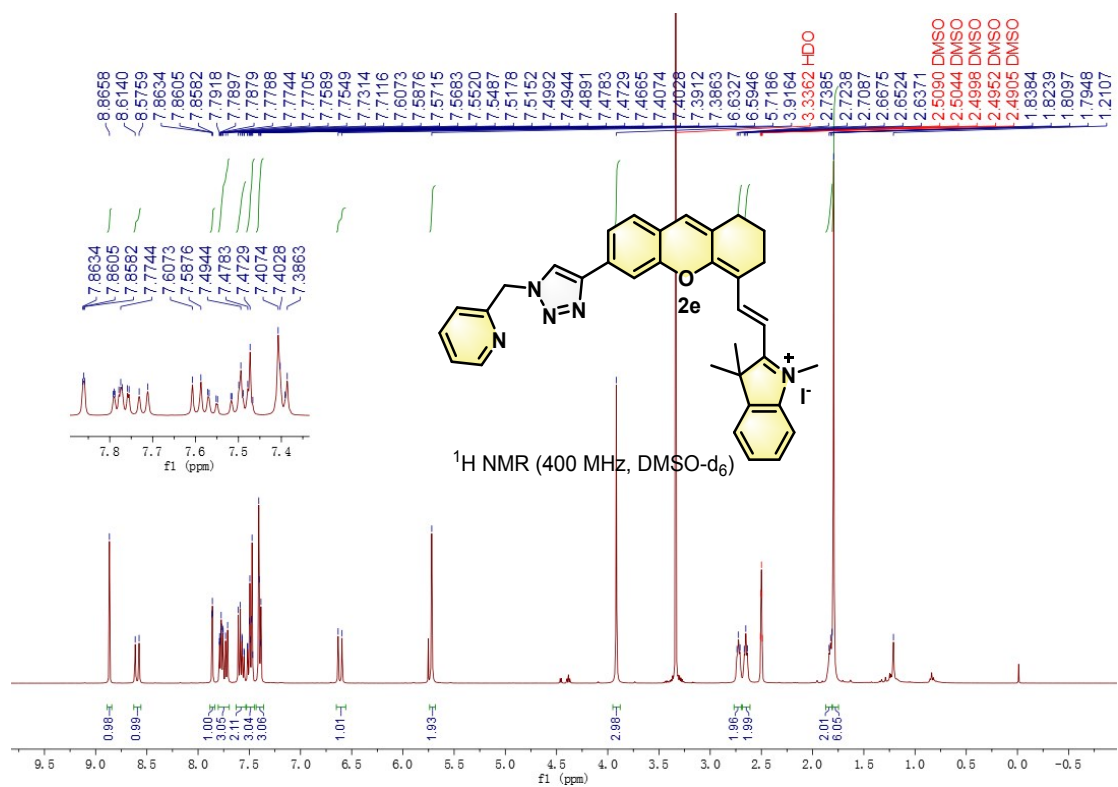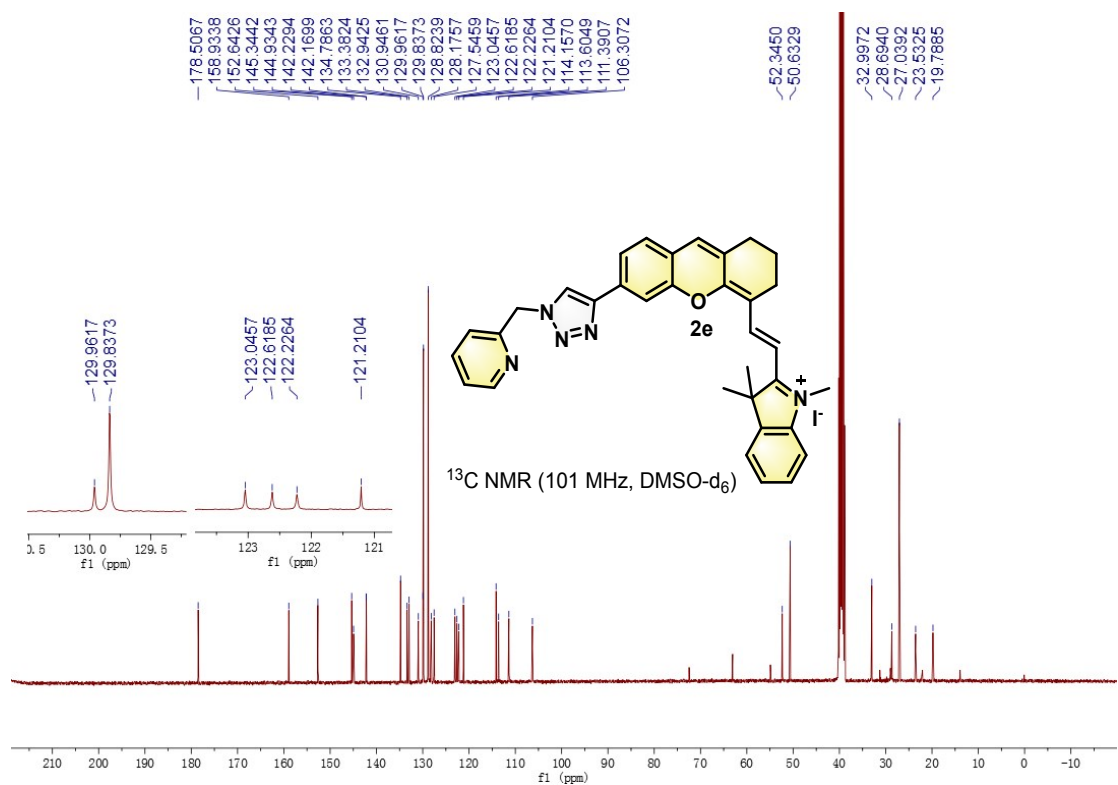



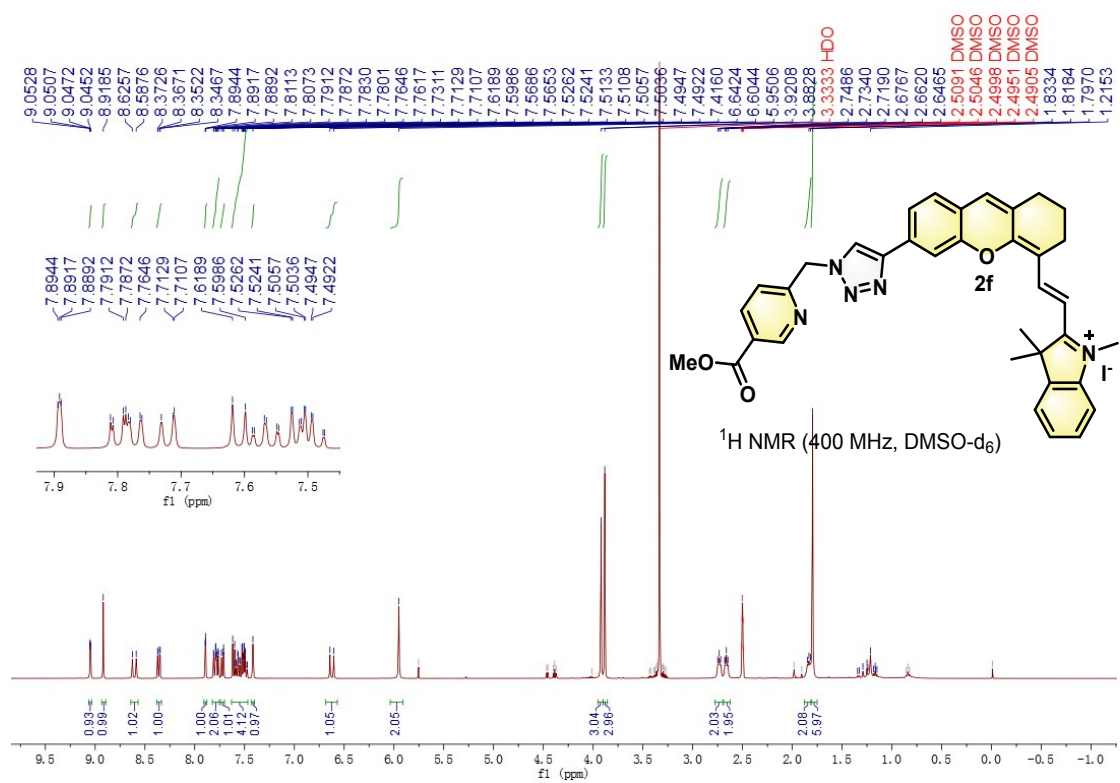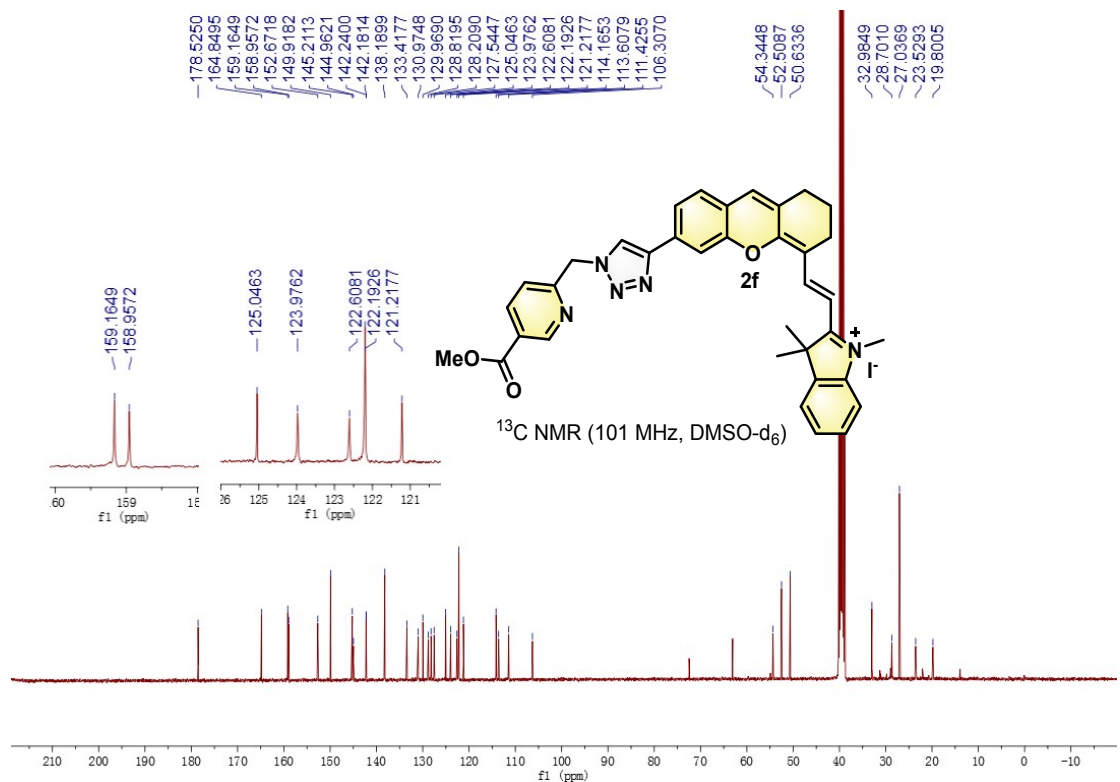

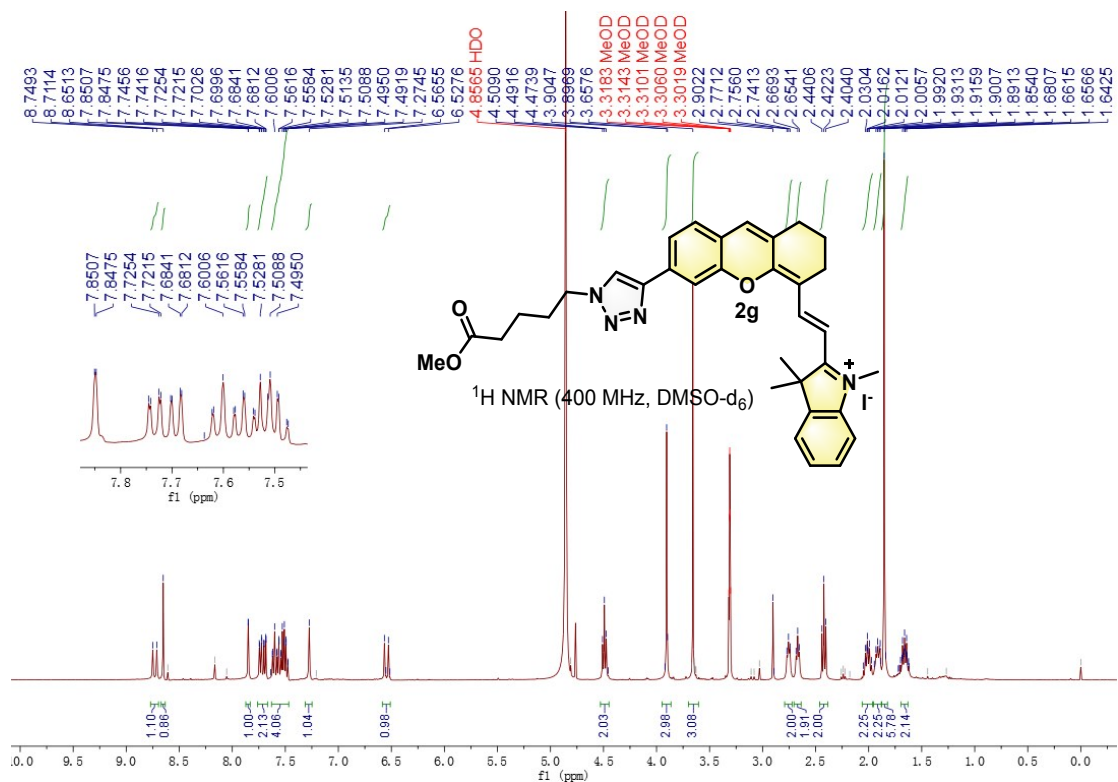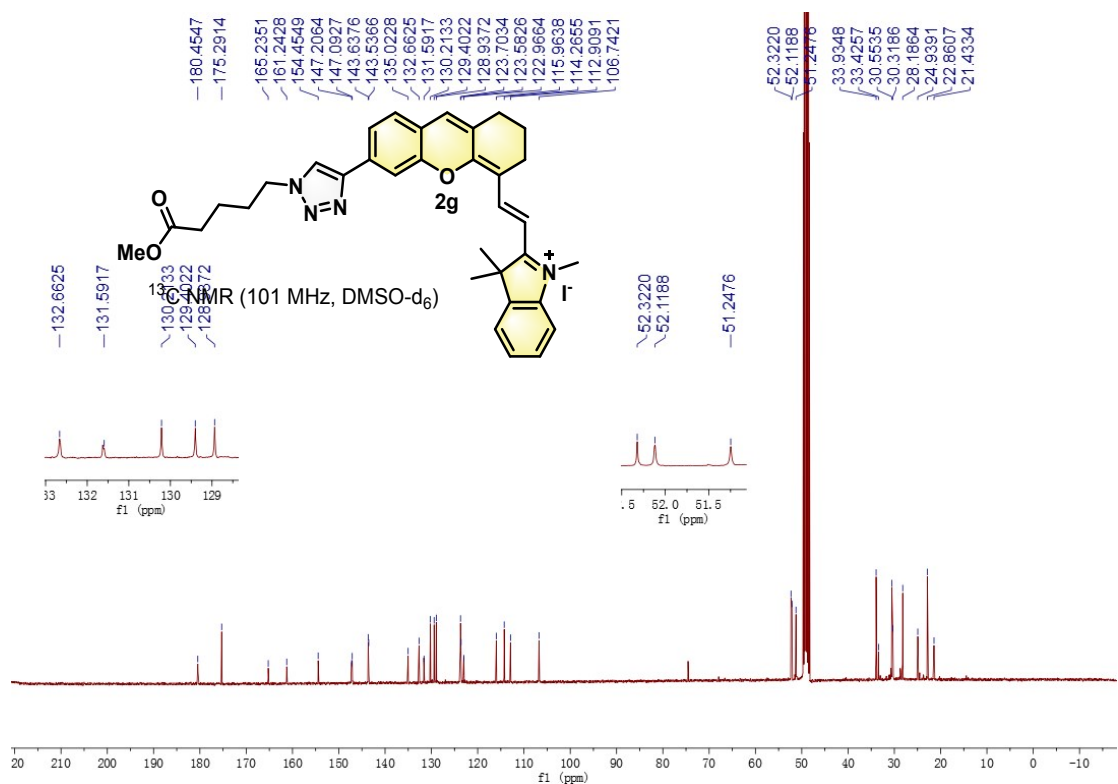

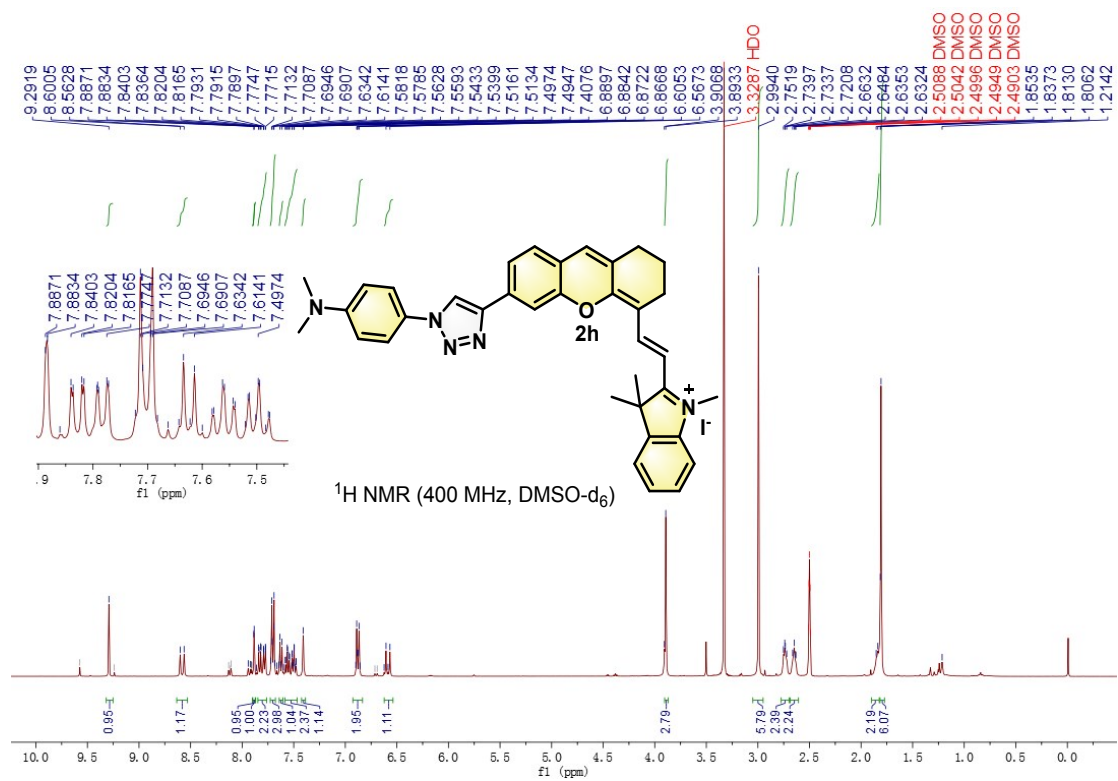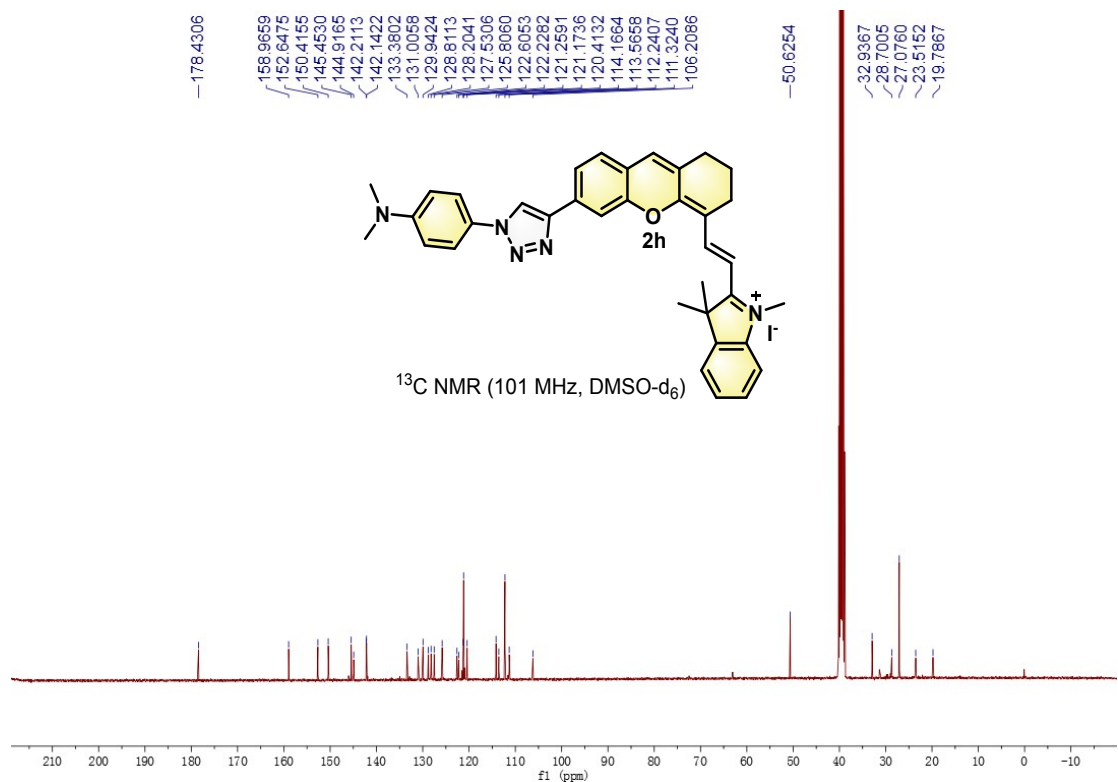



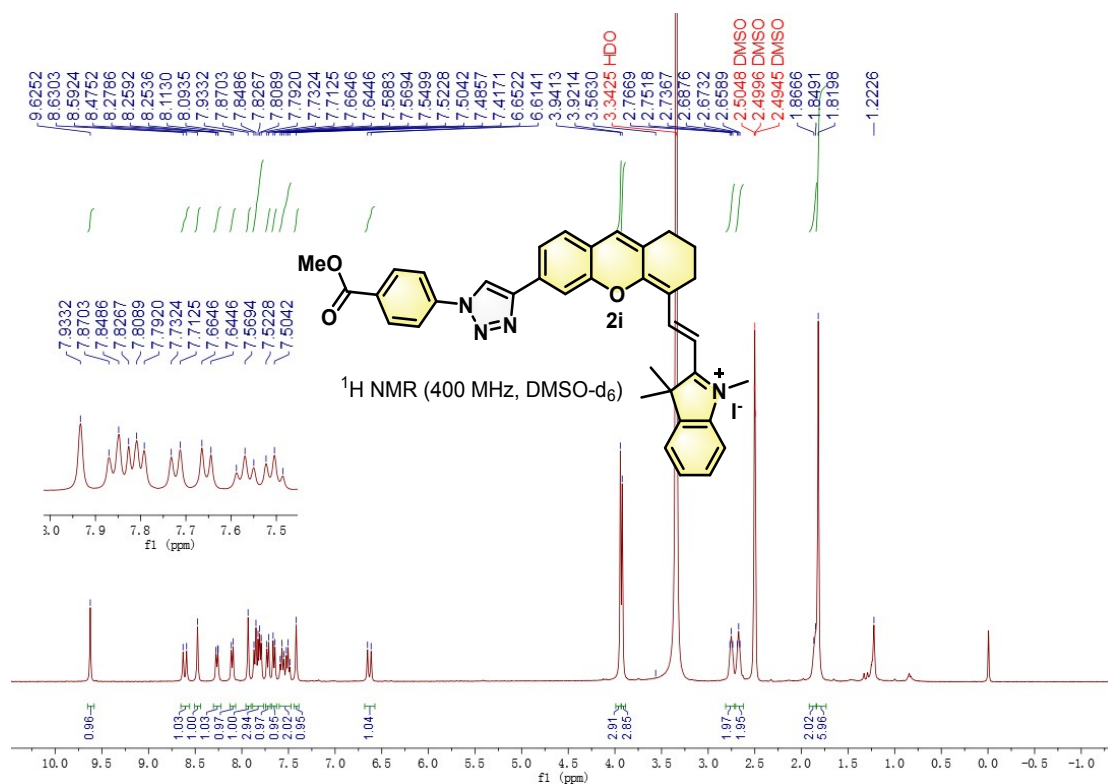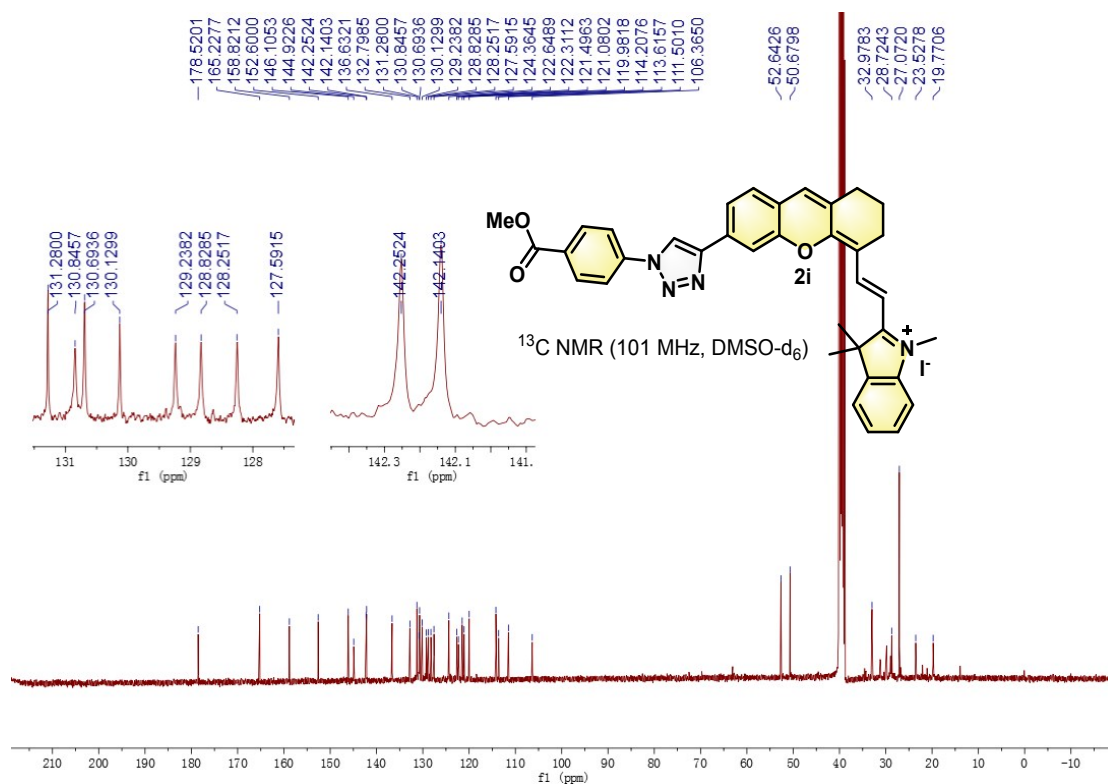

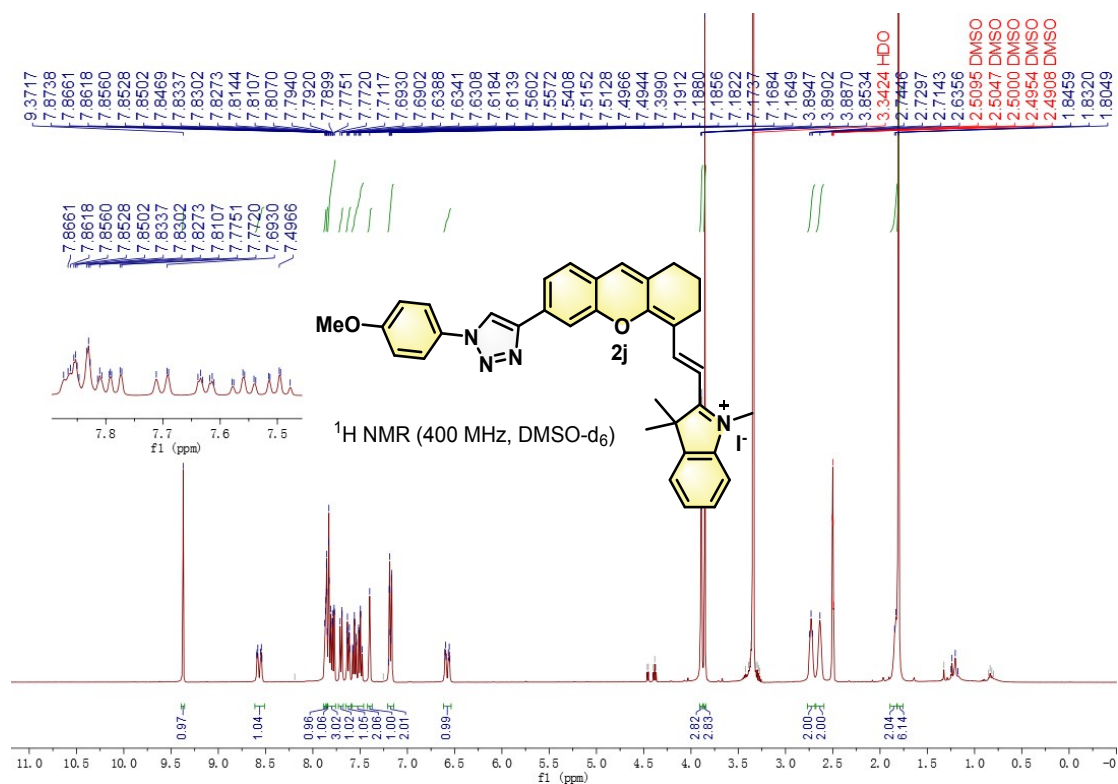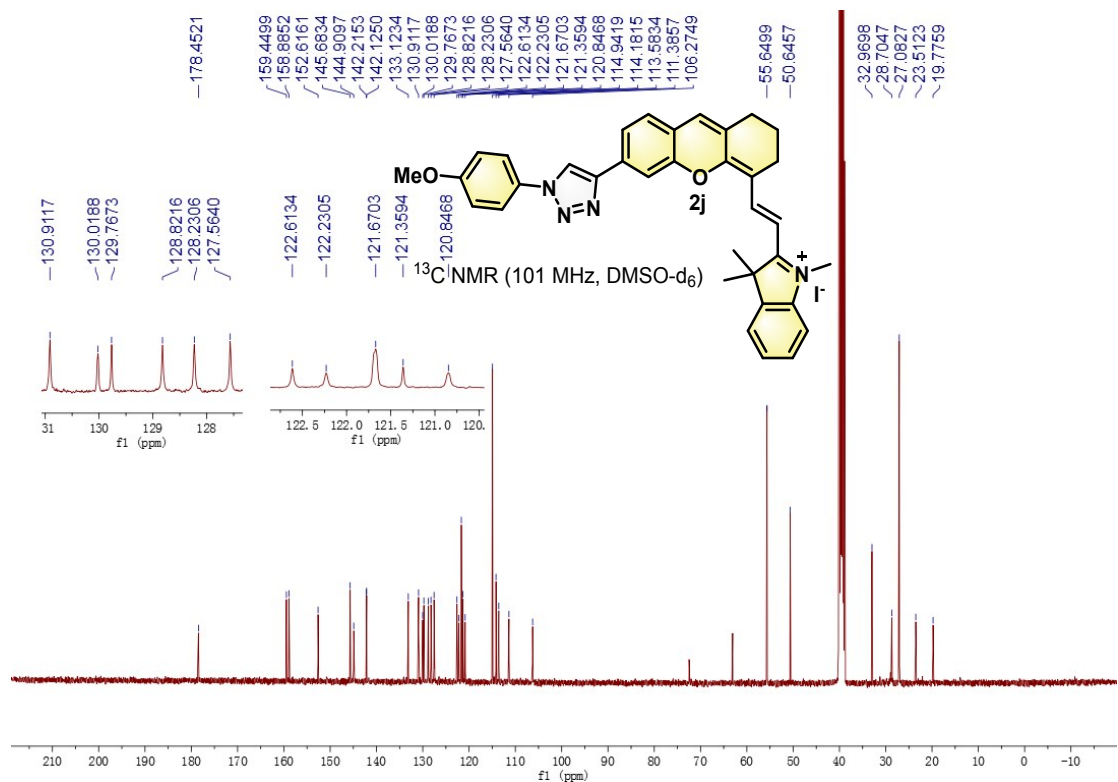

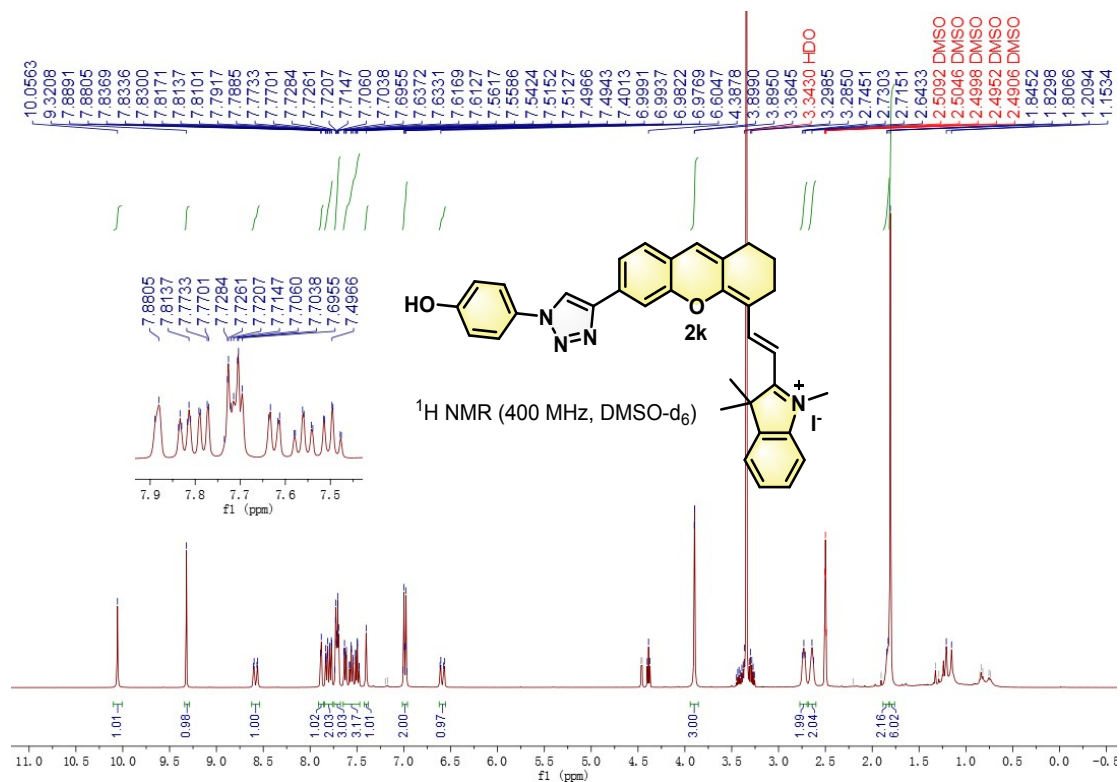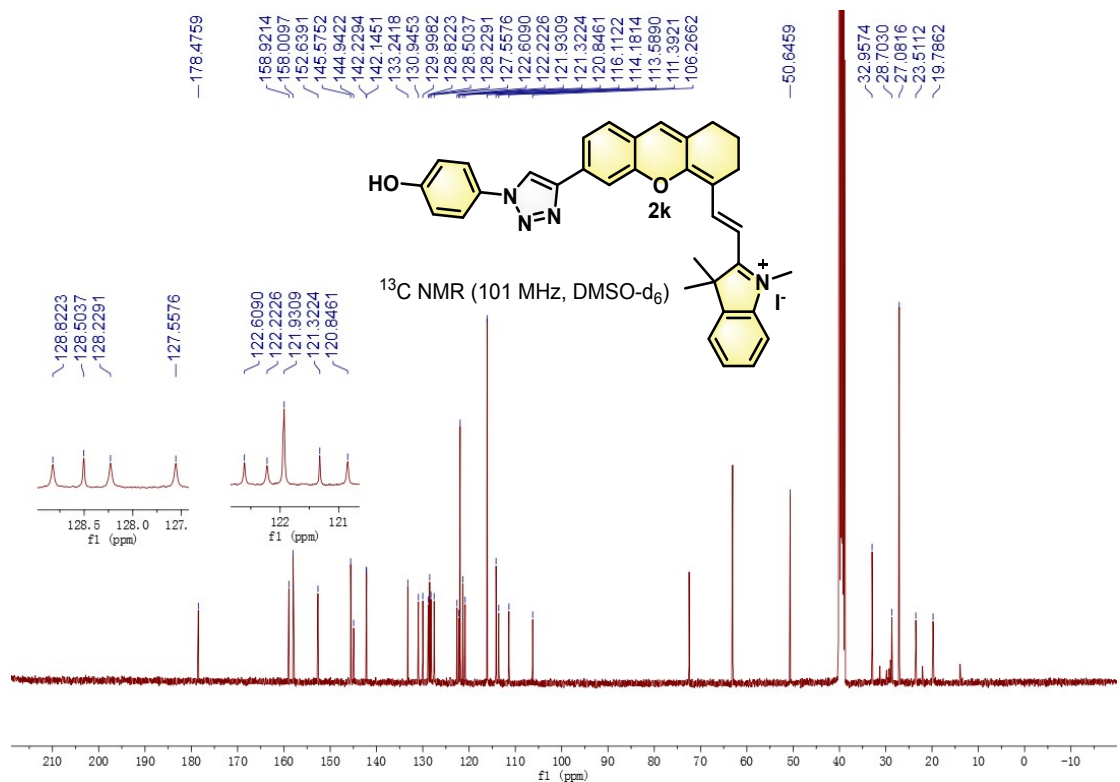

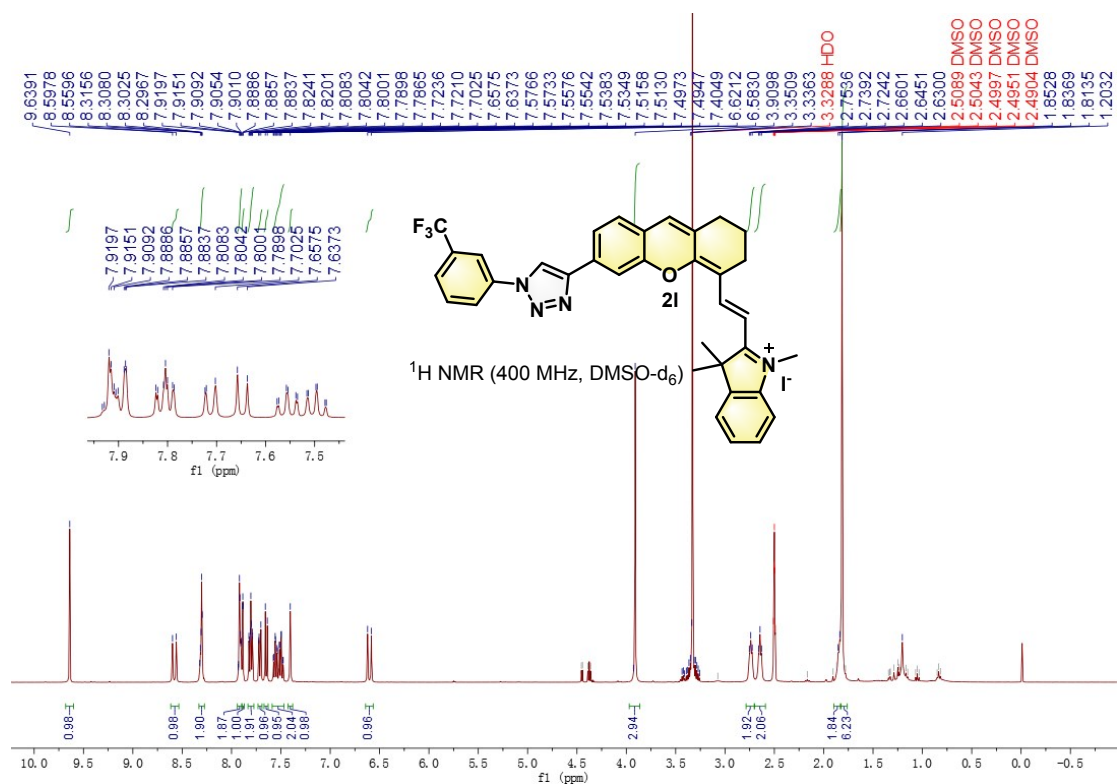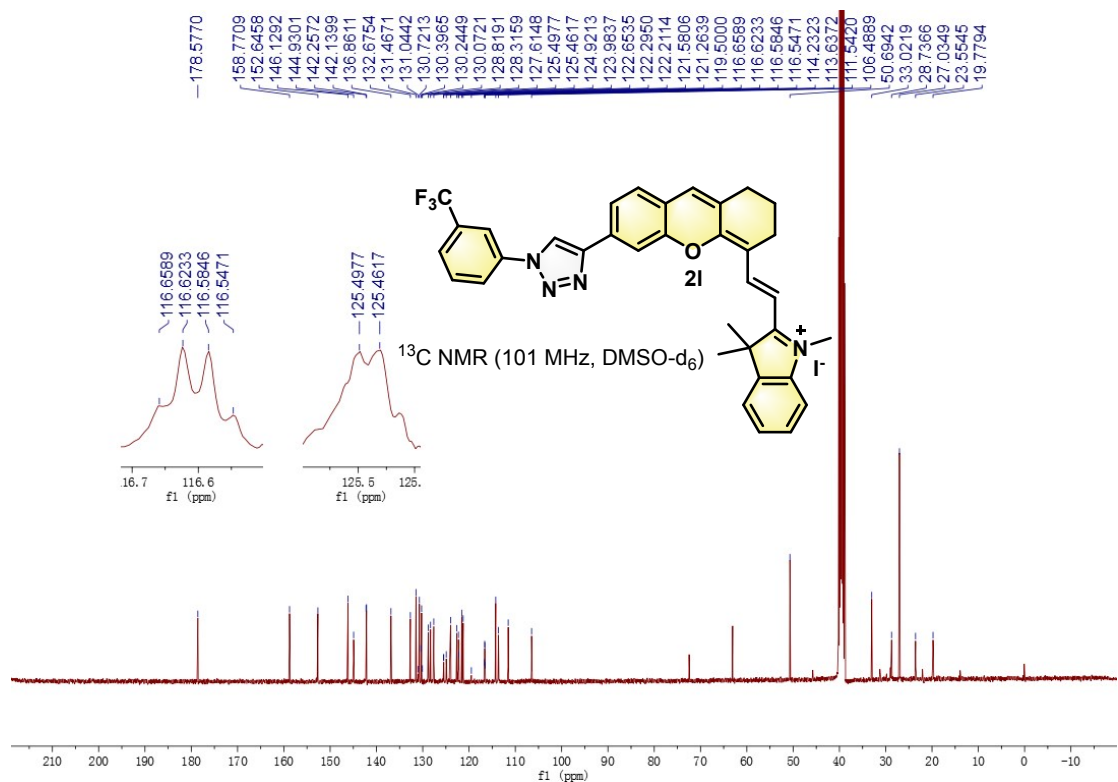

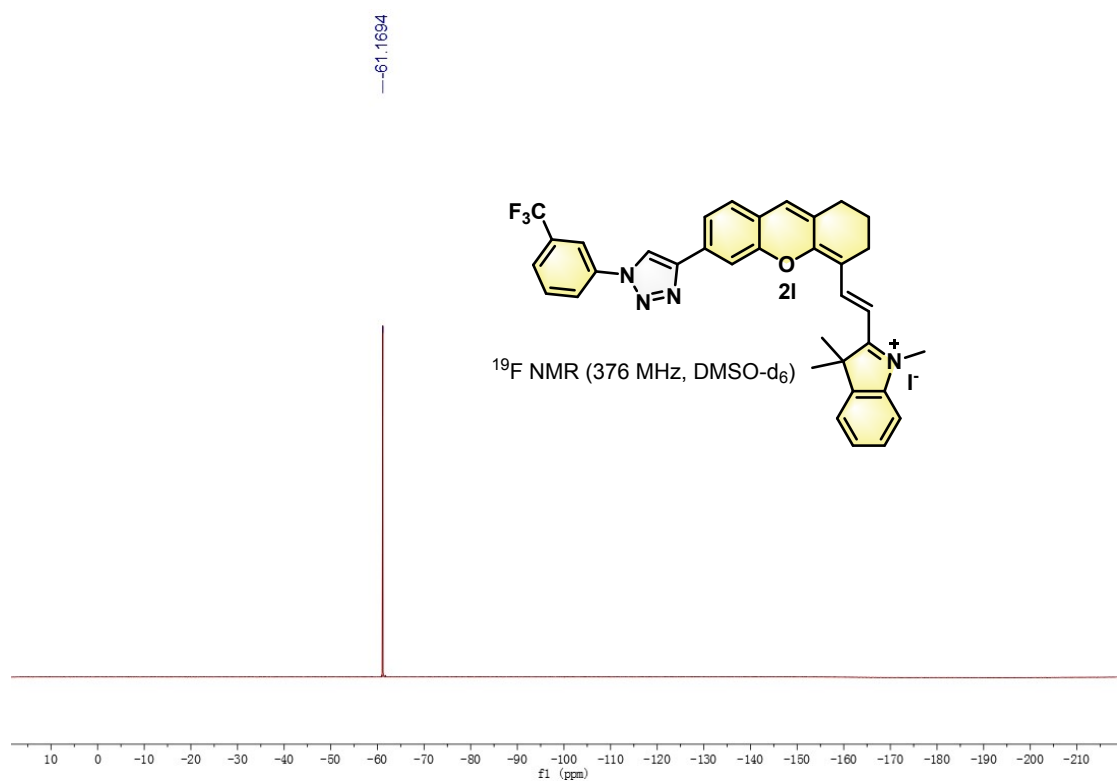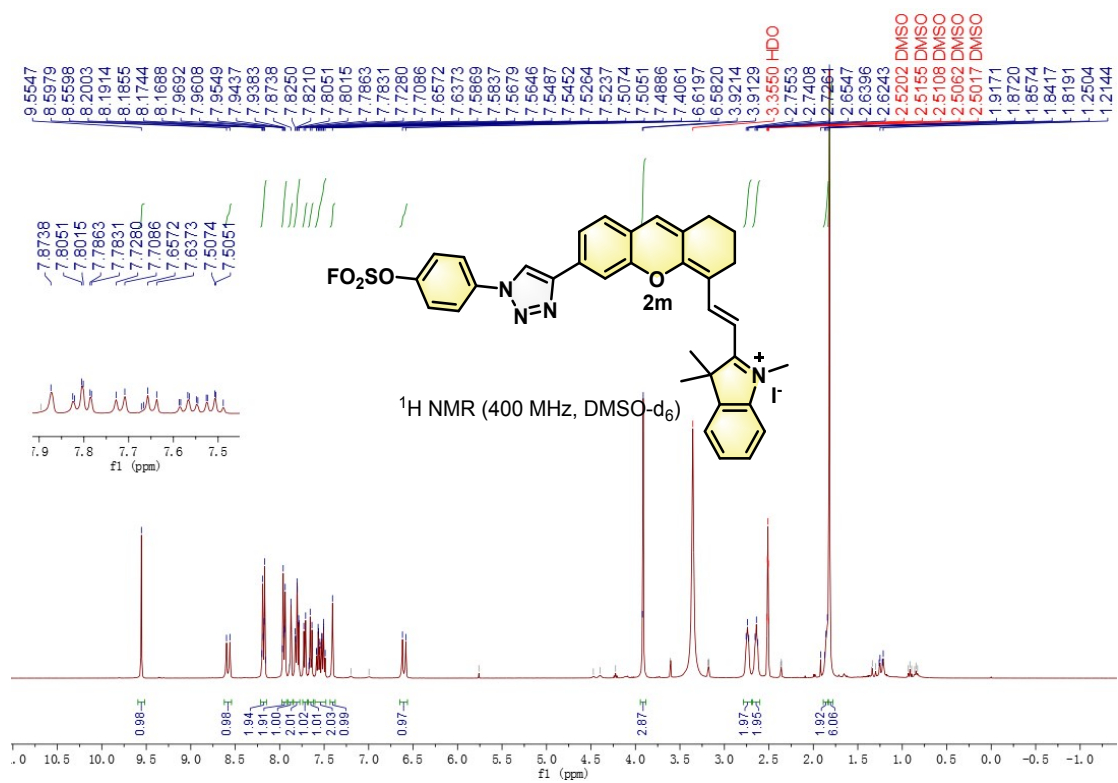

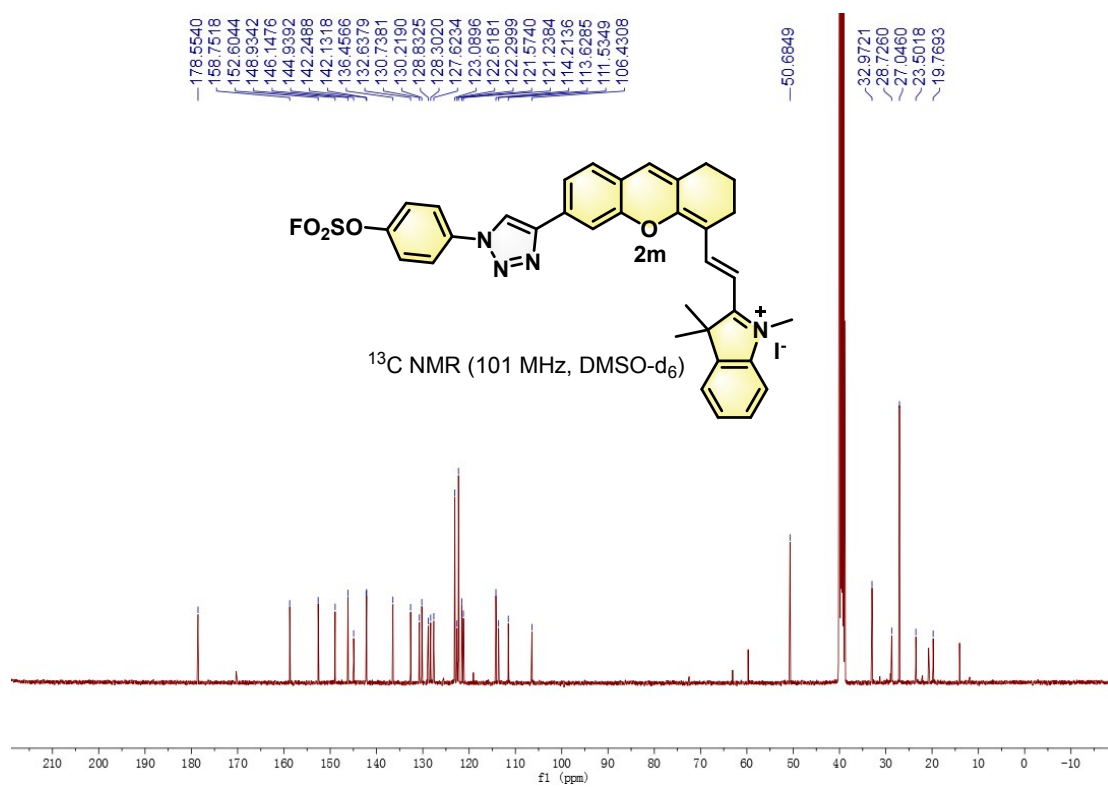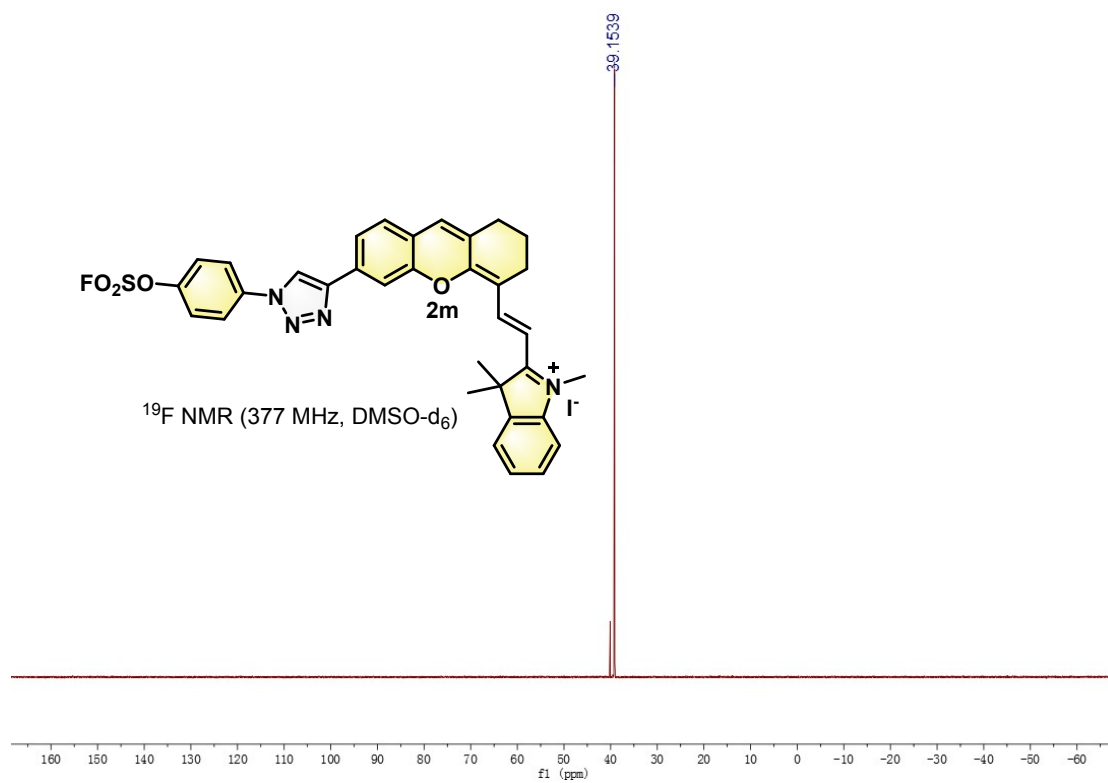



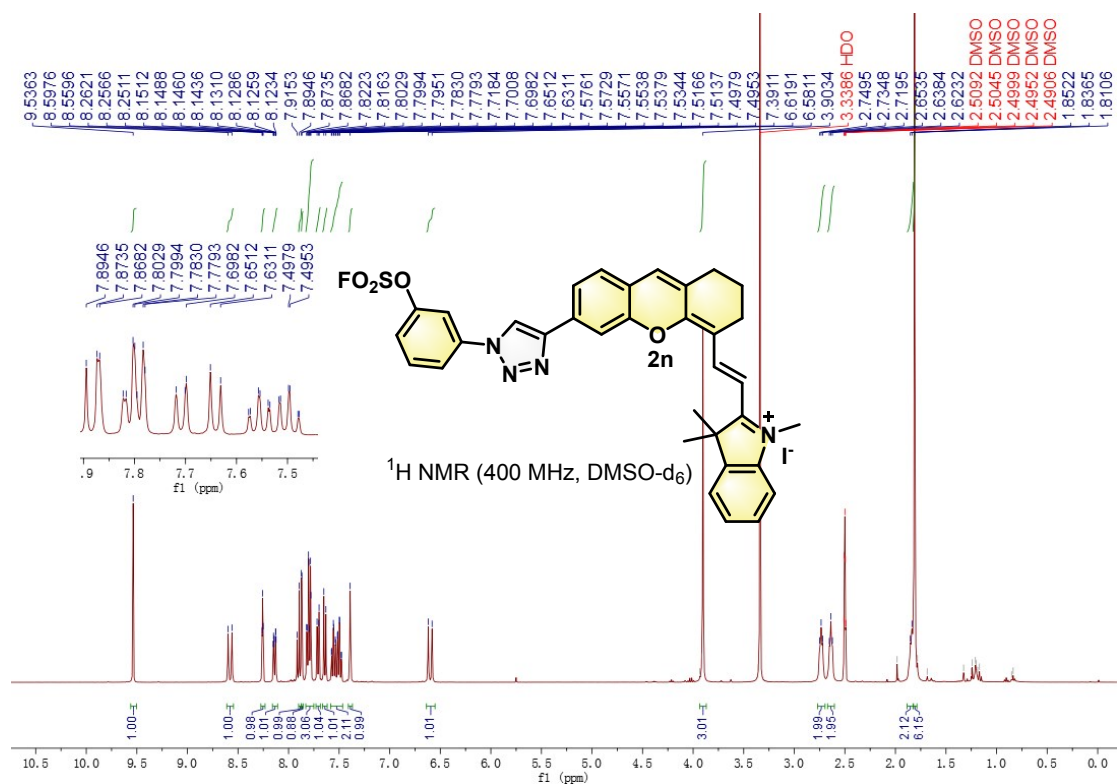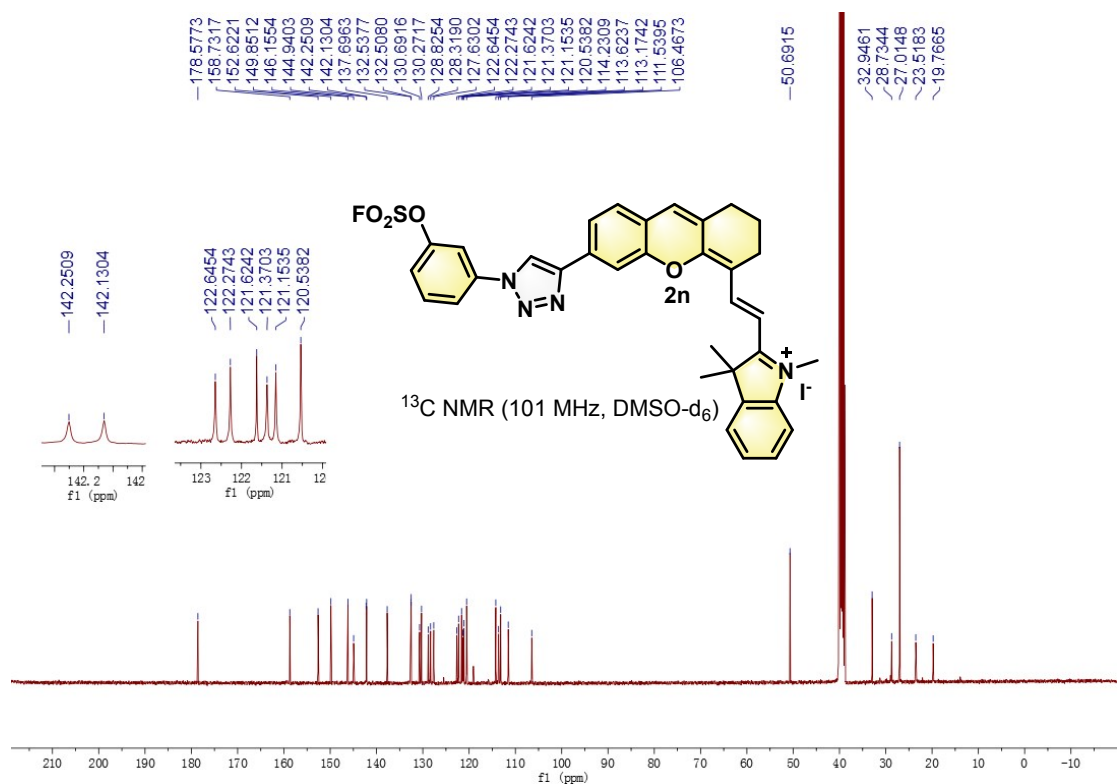

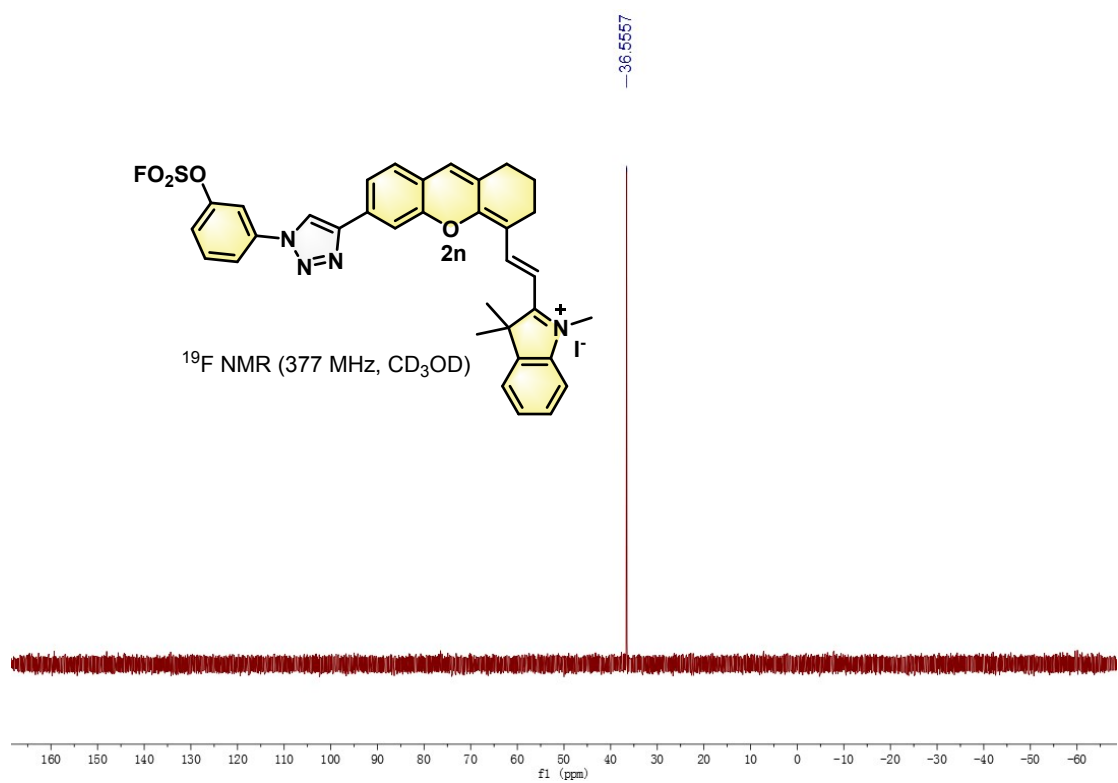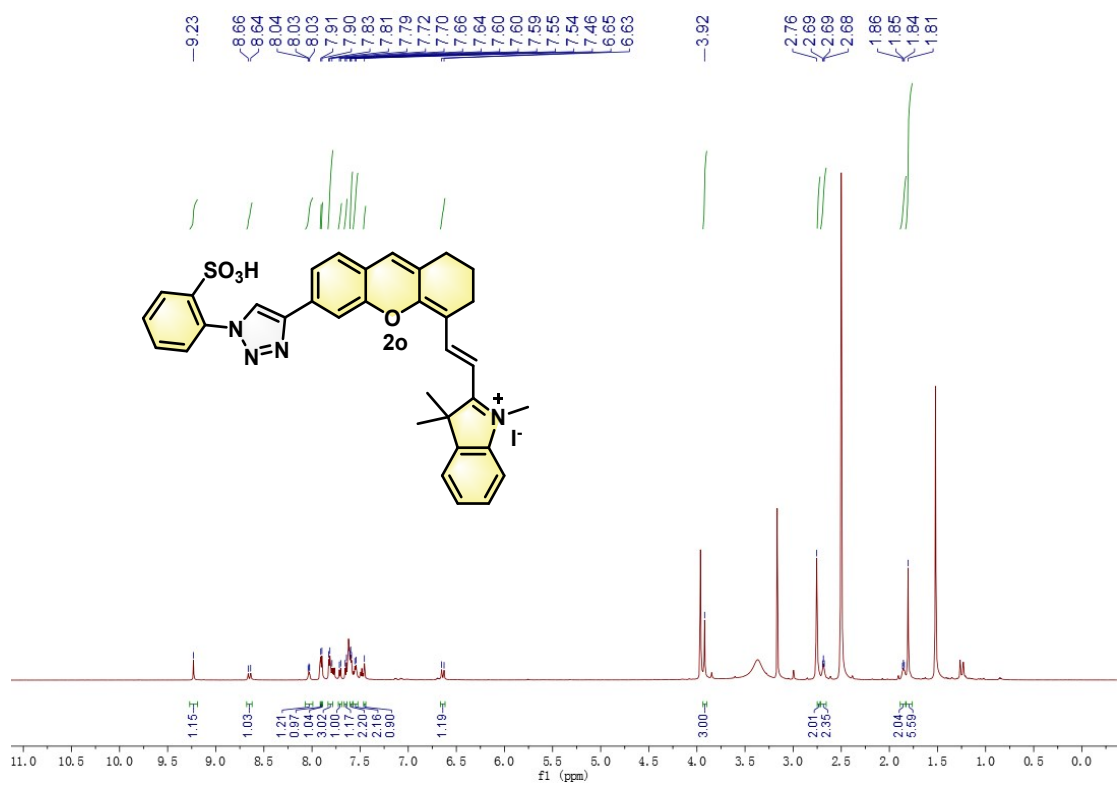



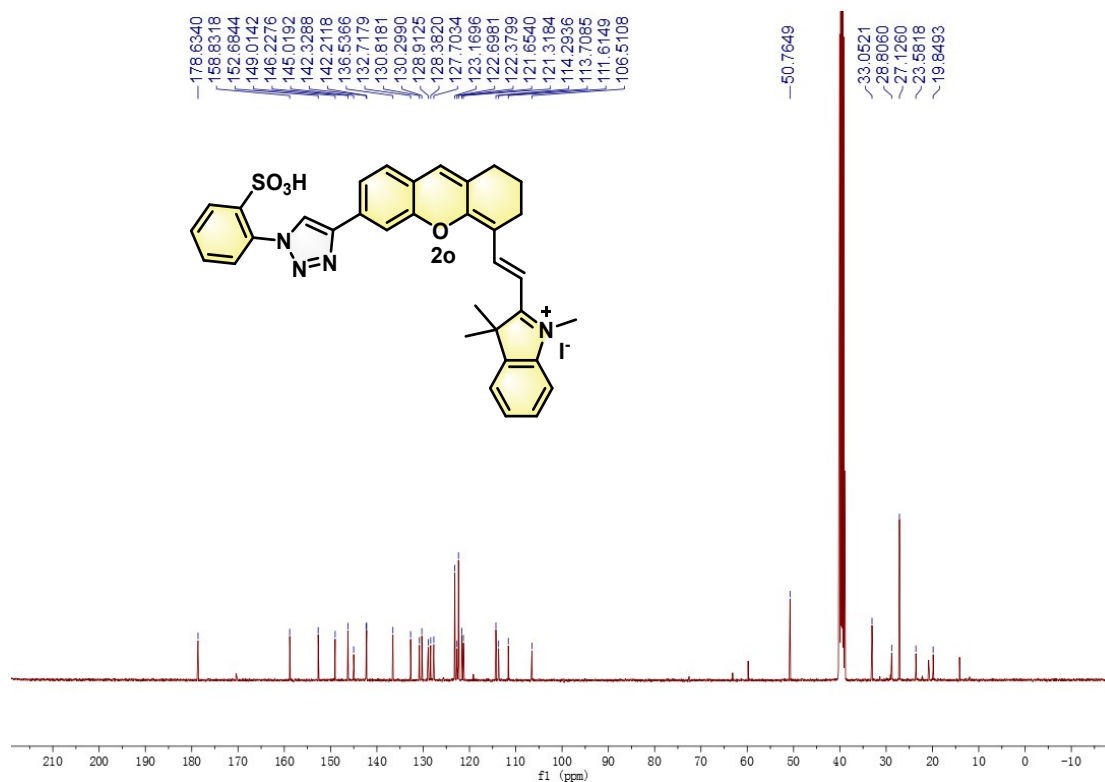

## 6. RP-HPLC analyses of triazole-based DHX-hemicyanine fused dyes

*Please note: RP-HPLC analyses were performed before re-numbering that we decided to do during the drafting of manuscript. That explains why the injection name "Trz-DHX-2x-QC" displayed on each e-copy of RP-HPLC elution profile is different from the molecule ID "2x" used in manuscript.*

*RP-HPLC elution profile of alkynyl-based DHX-hemicyanine fused dye 1 (system A, 260 nm)*

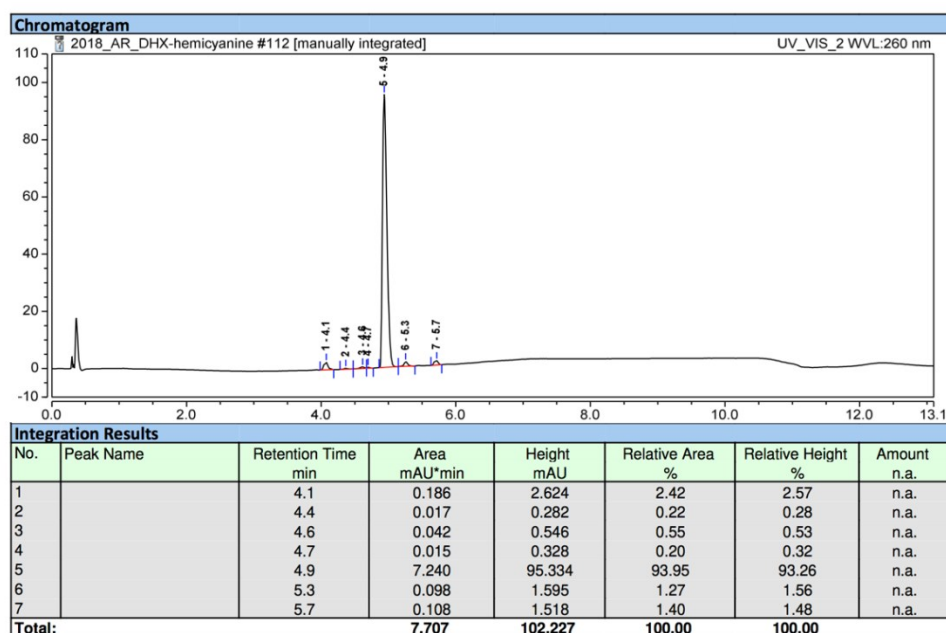

*RP-HPLC elution profile of of alkynyl-based DHX-hemicyanine fused dye 1 (system A, 600 nm)*

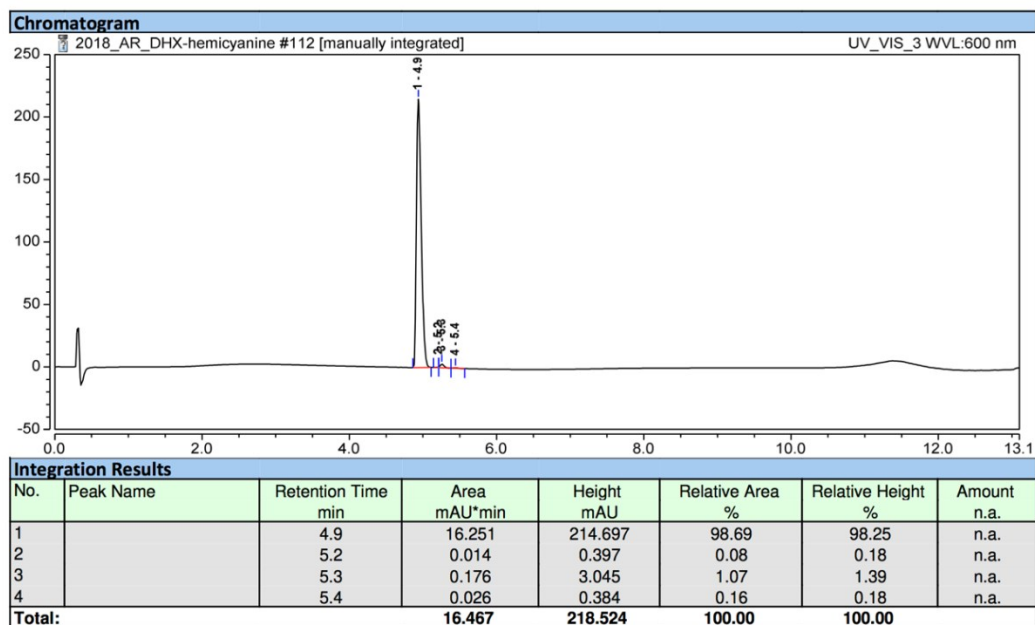

*RP-HPLC elution profile of alkynyl-based DHX-hemicyanine fused dye 1 (system B, 260 nm)*

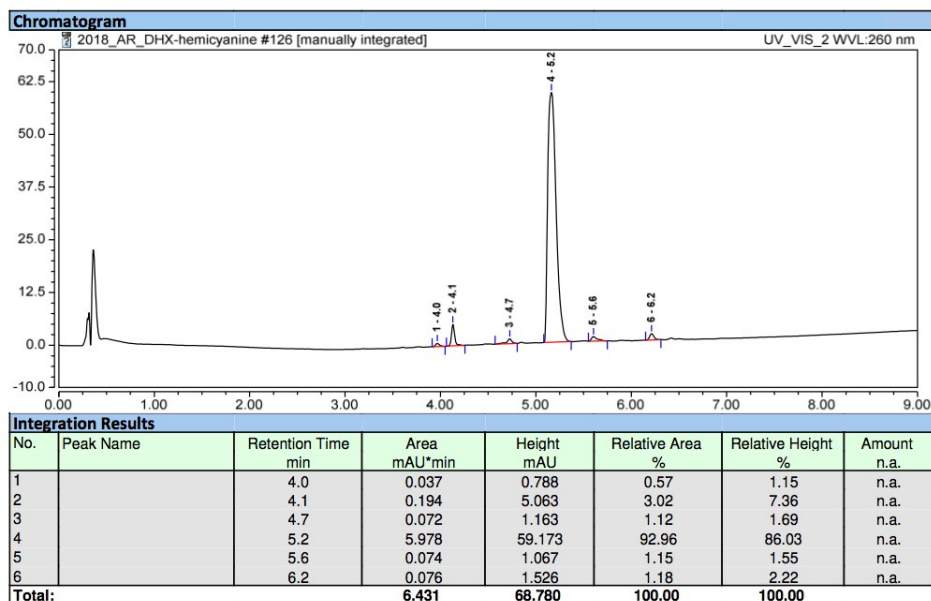

*RP-HPLC elution profile of a blank sample (system B, 260 nm)*

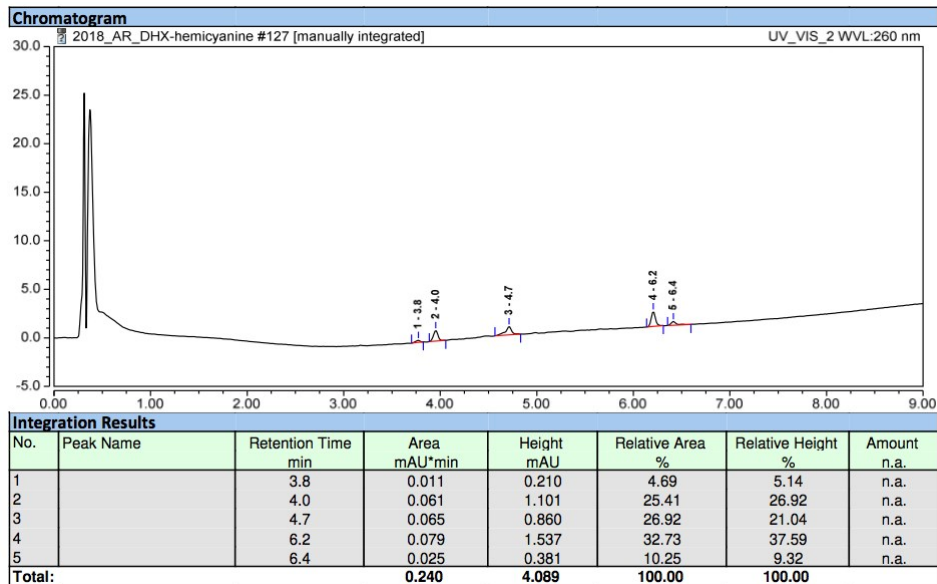

*RP-HPLC elution profile of alkynyl-based DHX-hemicyanine fused dye 1 (system B, 600 nm)*

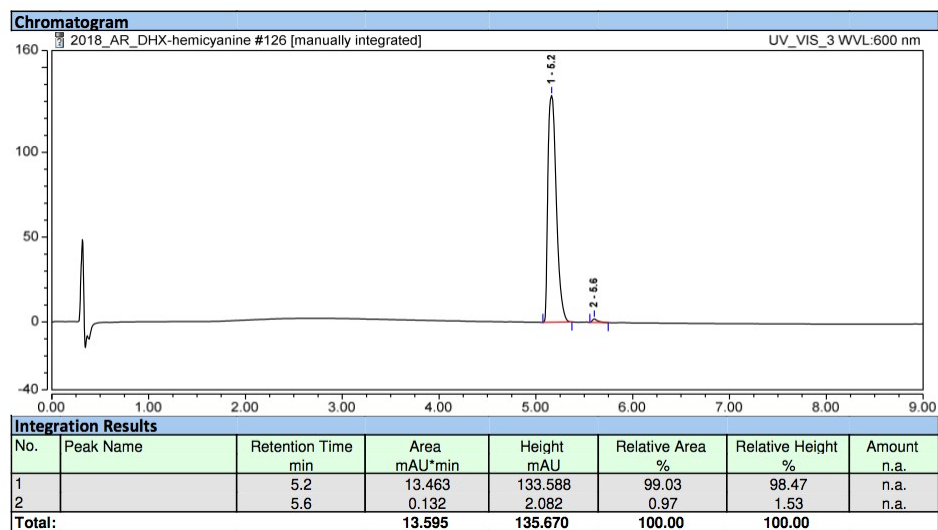

*RP-HPLC elution profile of triazole-based DHX-hemicyanine fused dye 2a (260 nm)*

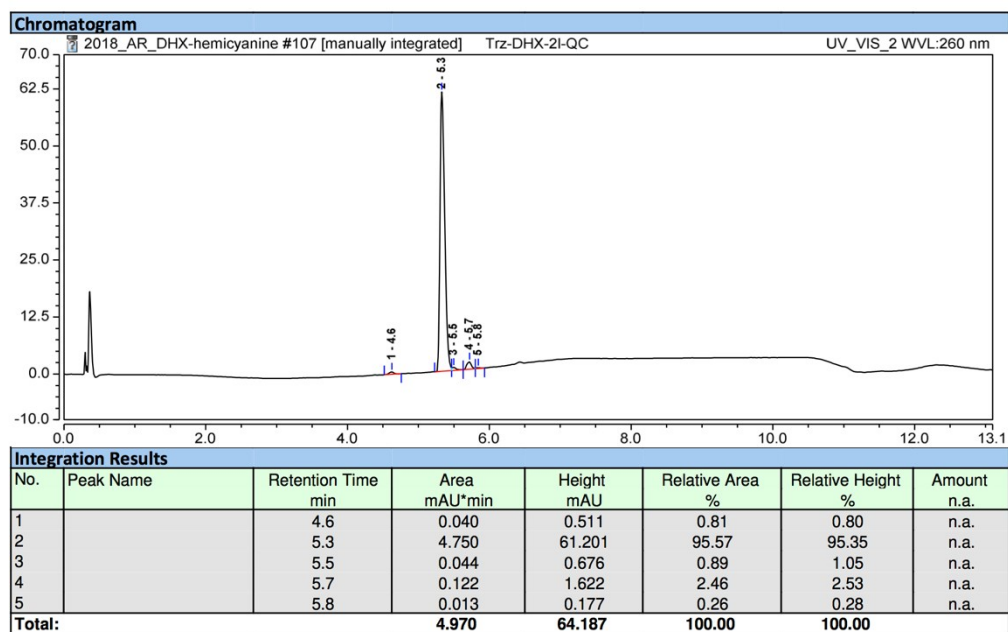

*RP-HPLC elution profile of triazole-based DHX-hemicyanine fused dye 2a (600 nm)*

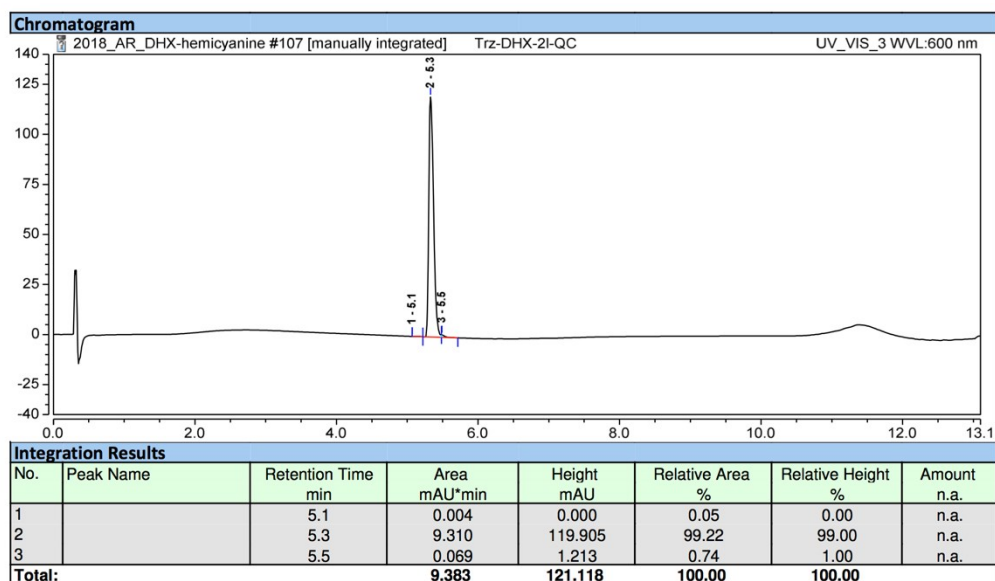

*RP-HPLC elution profile of triazole-based DHX-hemicyanine fused dye 2b (260 nm)*

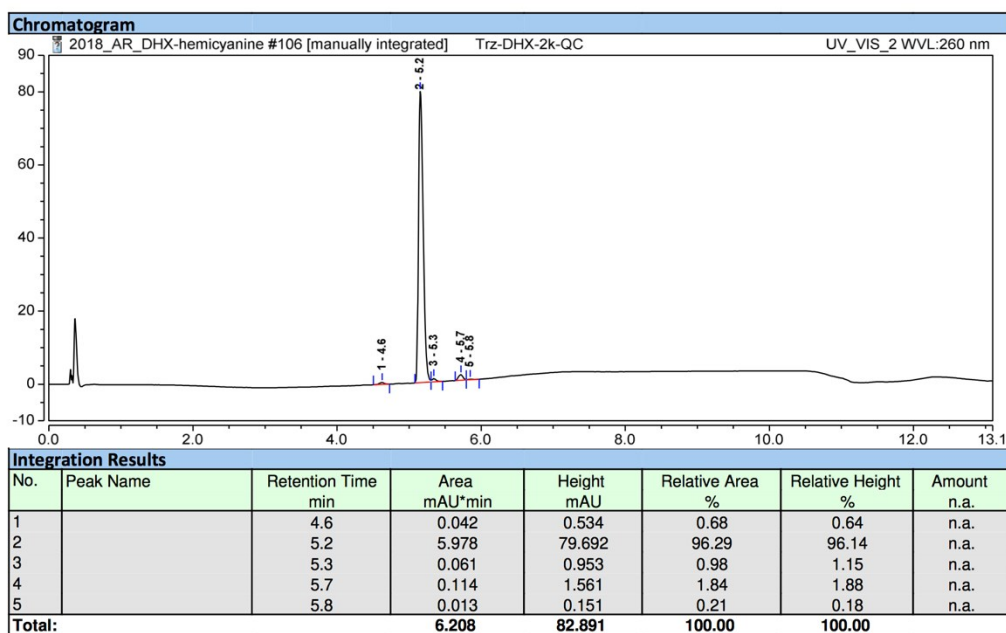

*RP-HPLC elution profile of triazole-based DHX-hemicyanine fused dye 2b (600 nm)*

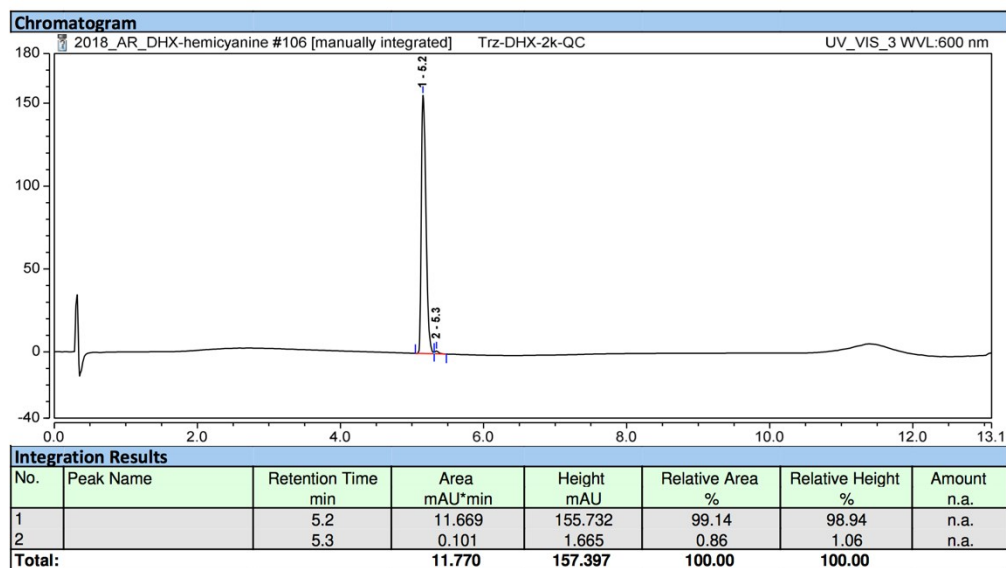

*RP-HPLC elution profile of triazole-based DHX-hemicyanine fused dye 2c (260 nm)*

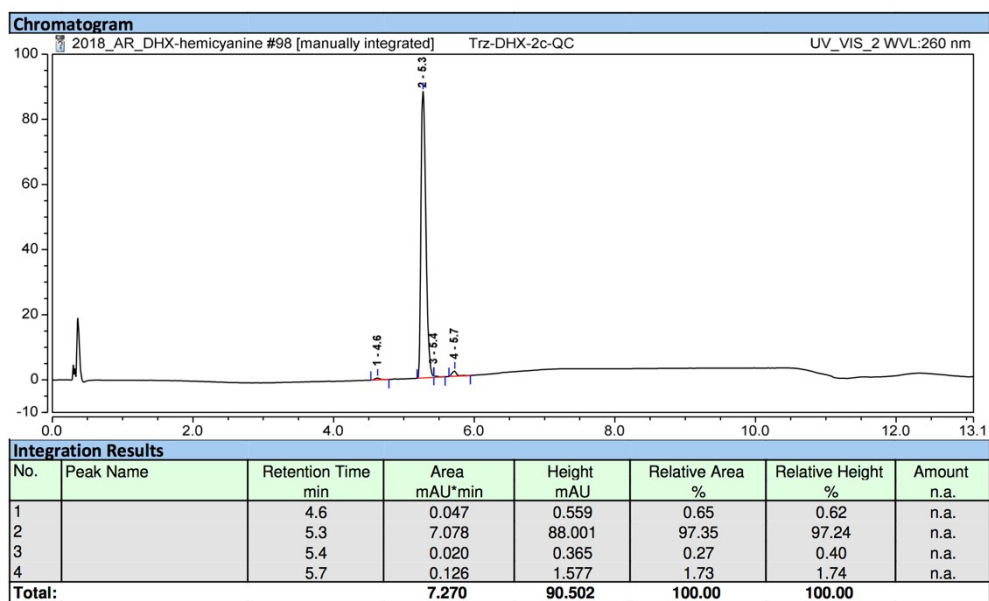

*RP-HPLC elution profile of triazole-based DHX-hemicyanine fused dye 2c (600 nm)*

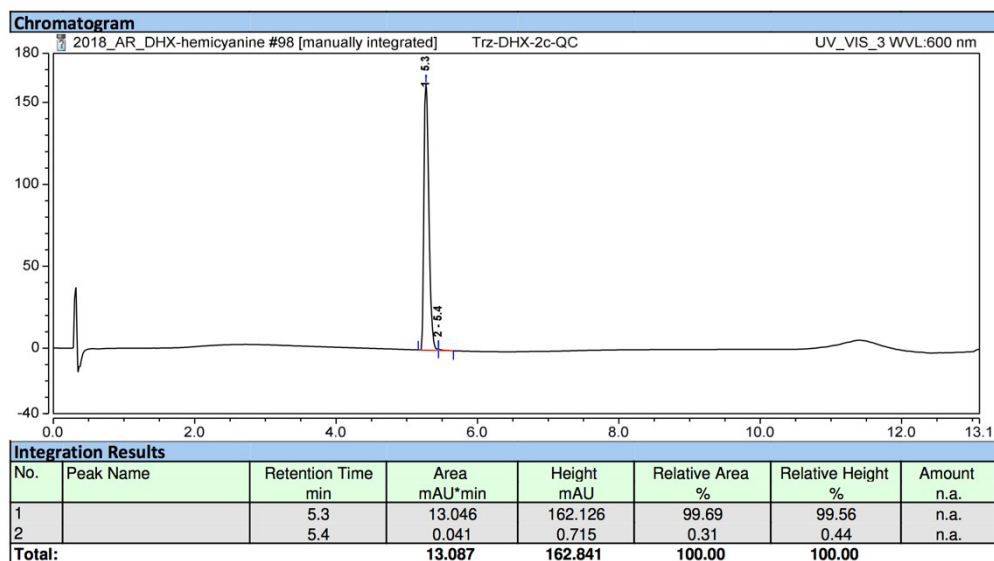

*RP-HPLC elution profile of triazole-based DHX-hemicyanine fused dye 2d (260 nm)*

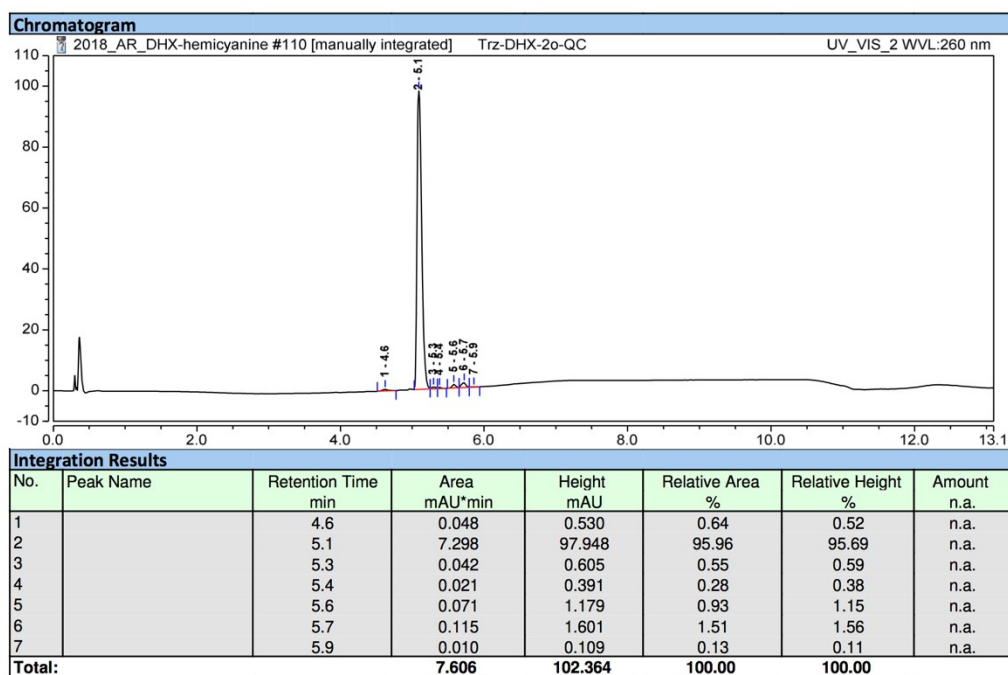

*RP-HPLC elution profile of triazole-based DHX-hemicyanine fused dye 2d (600 nm)*

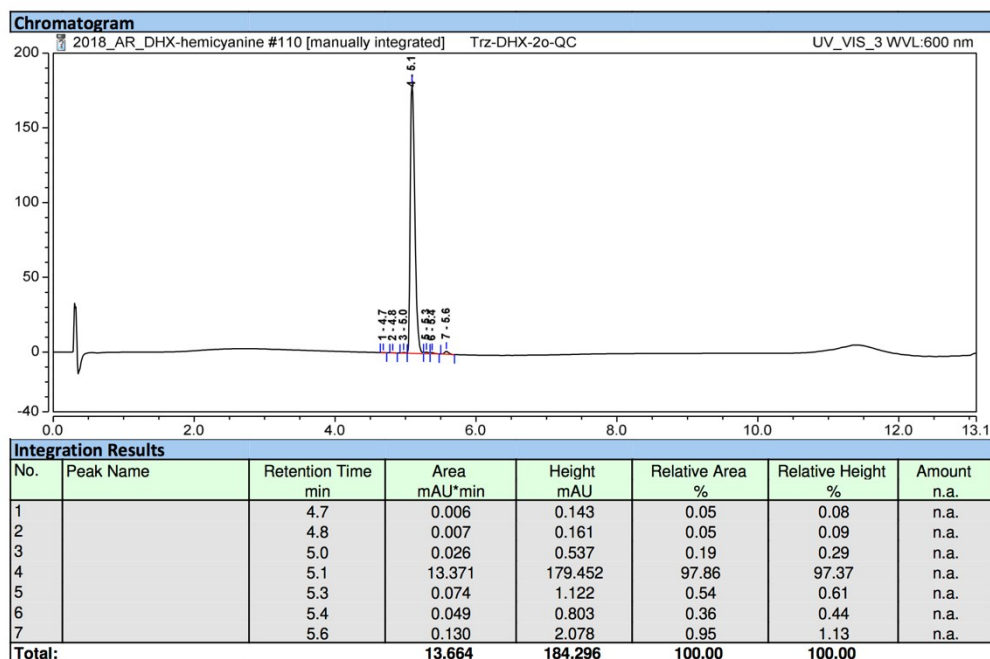

*RP-HPLC elution profile of triazole-based DHX-hemicyanine fused dye 2e (260 nm)*

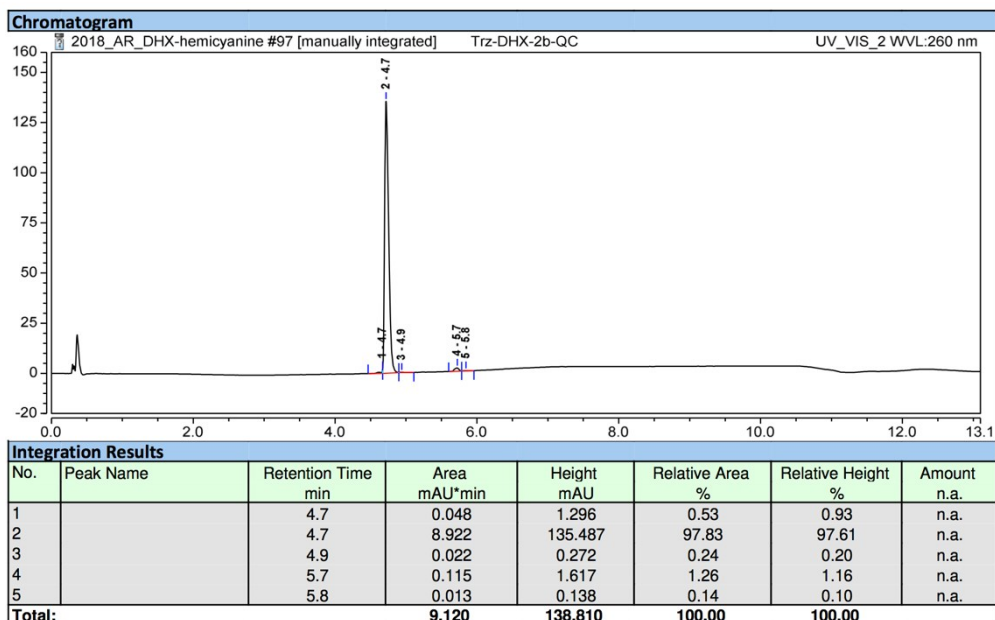



*RP-HPLC elution profile of triazole-based DHX-hemicyanine fused dye 2e (600 nm)*

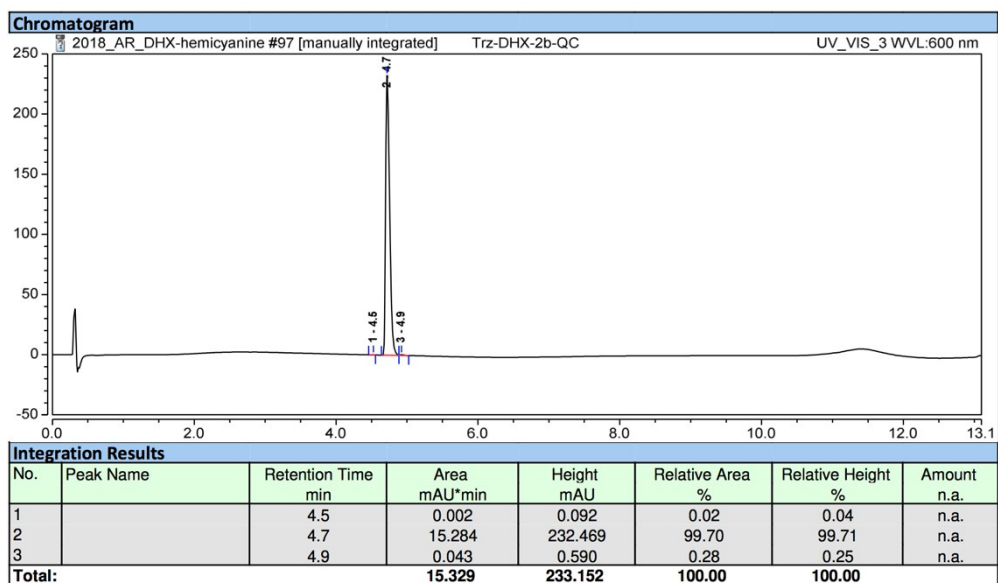

*RP-HPLC elution profile of triazole-based DHX-hemicyanine fused dye 2f (260 nm)*

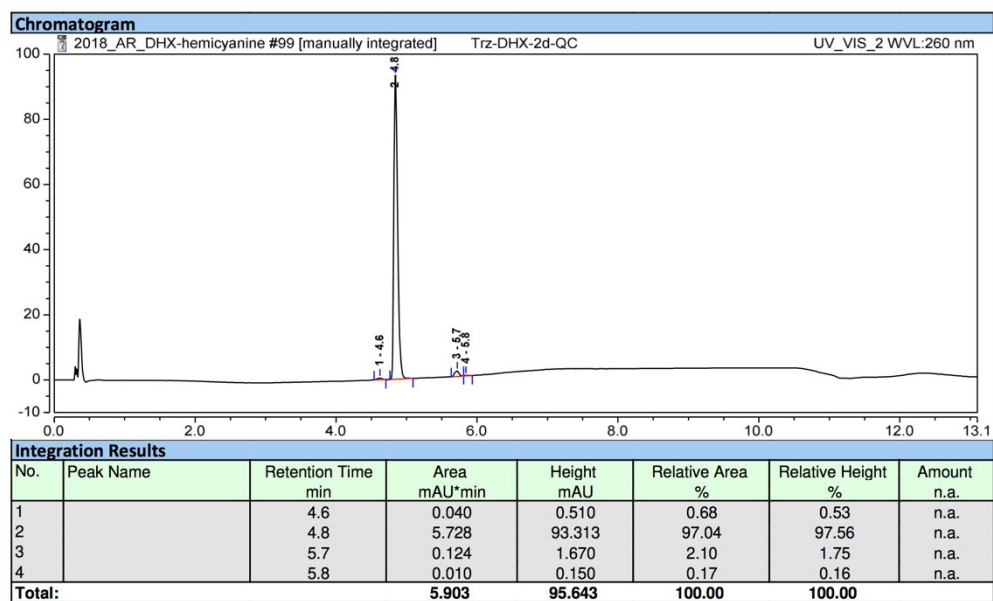

*RP-HPLC elution profile of triazole-based DHX-hemicyanine fused dye 2f (600 nm)*

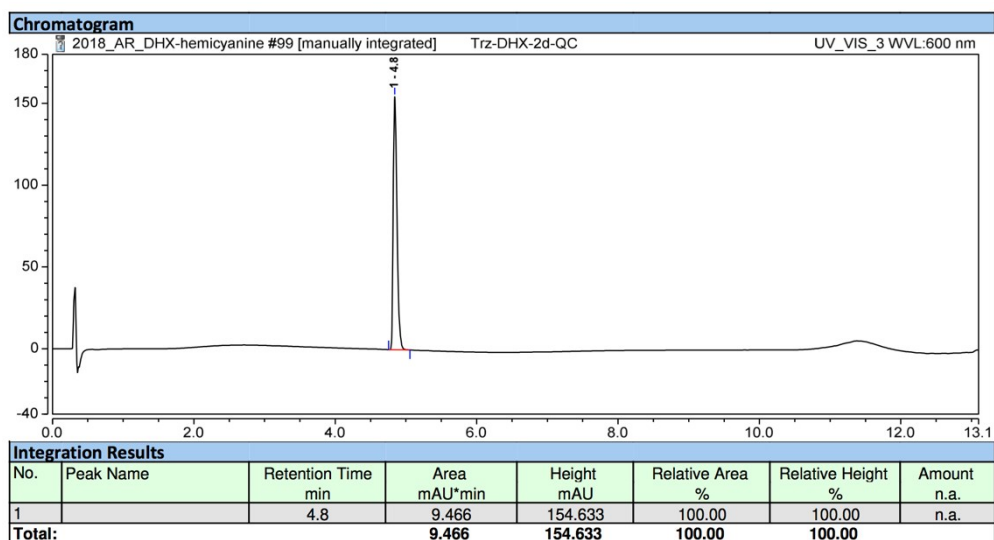

*RP-HPLC elution profile of triazole-based DHX-hemicyanine fused dye 2g (260 nm)*

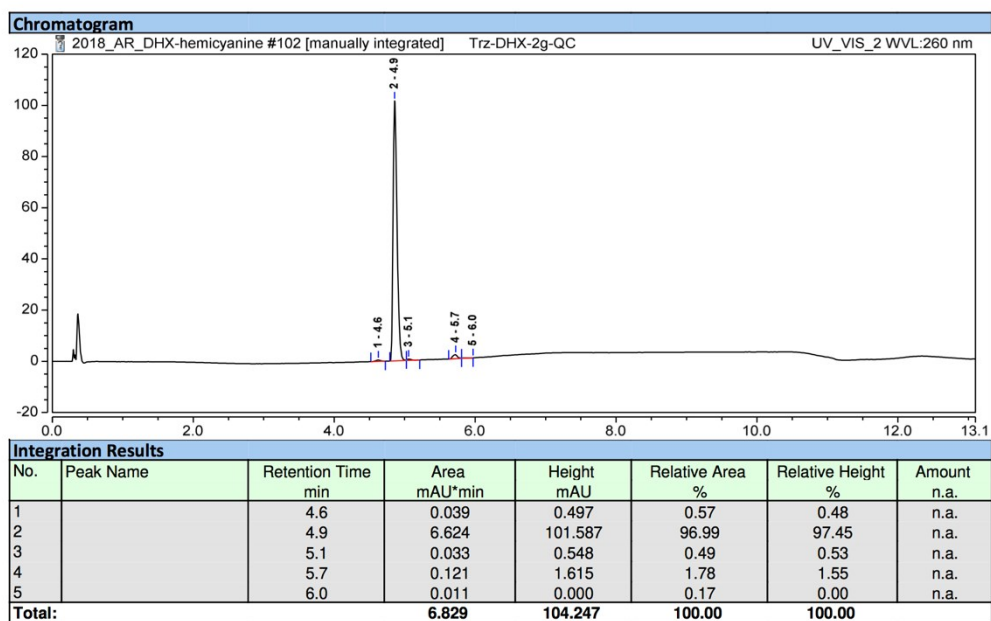

*RP-HPLC elution profile of triazole-based DHX-hemicyanine fused dye **2g** (600 nm)*

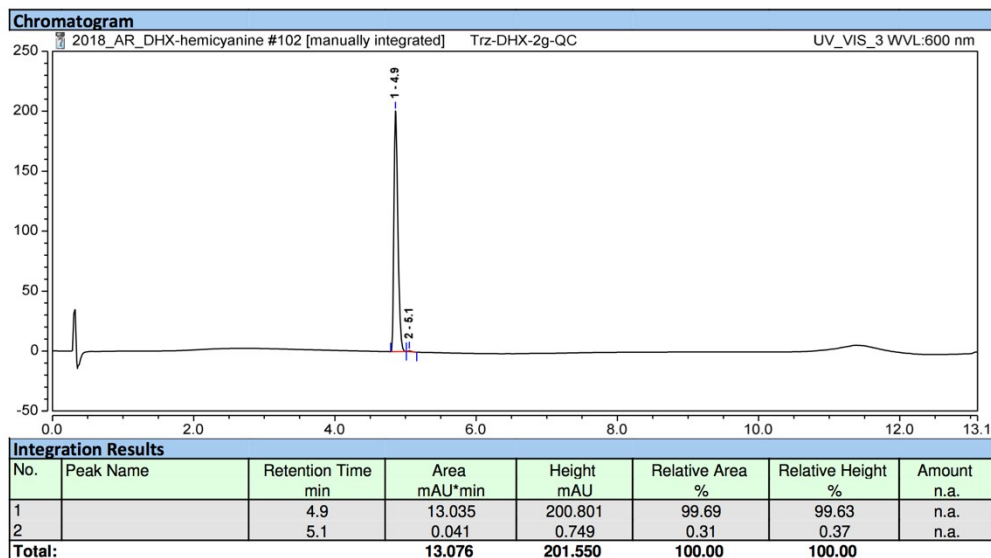

*RP-HPLC elution profile of triazole-based DHX-hemicyanine fused dye **2h** (260 nm)*

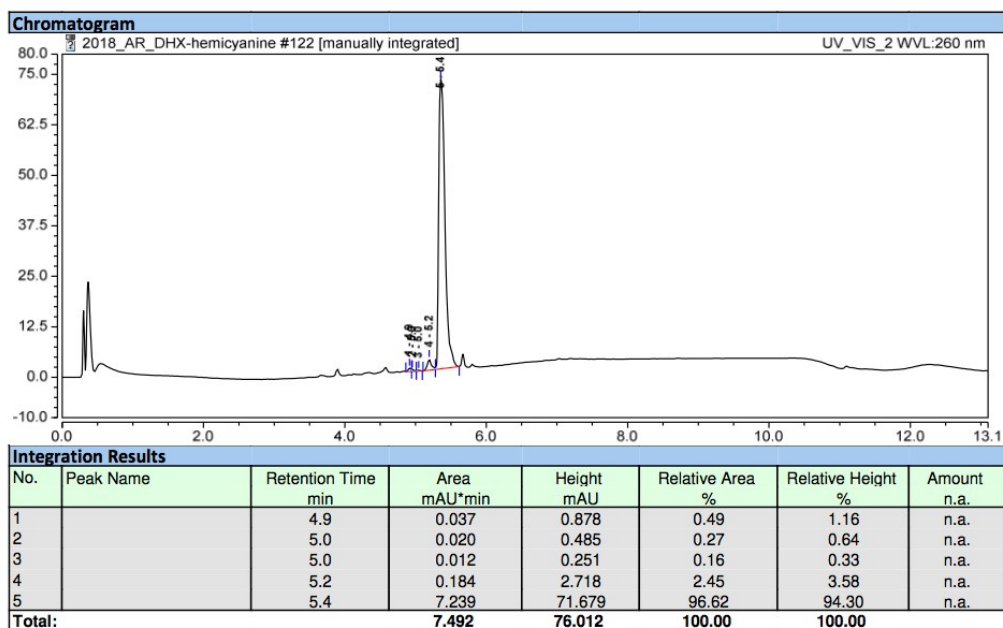

*Please note: non-integrated peaks at  $t_R$  = 3.9, 4.6, 5.7 and 5.8 min were found in blank sample (vide infra).*

*RP-HPLC elution profile of a blank sample (260 nm)*

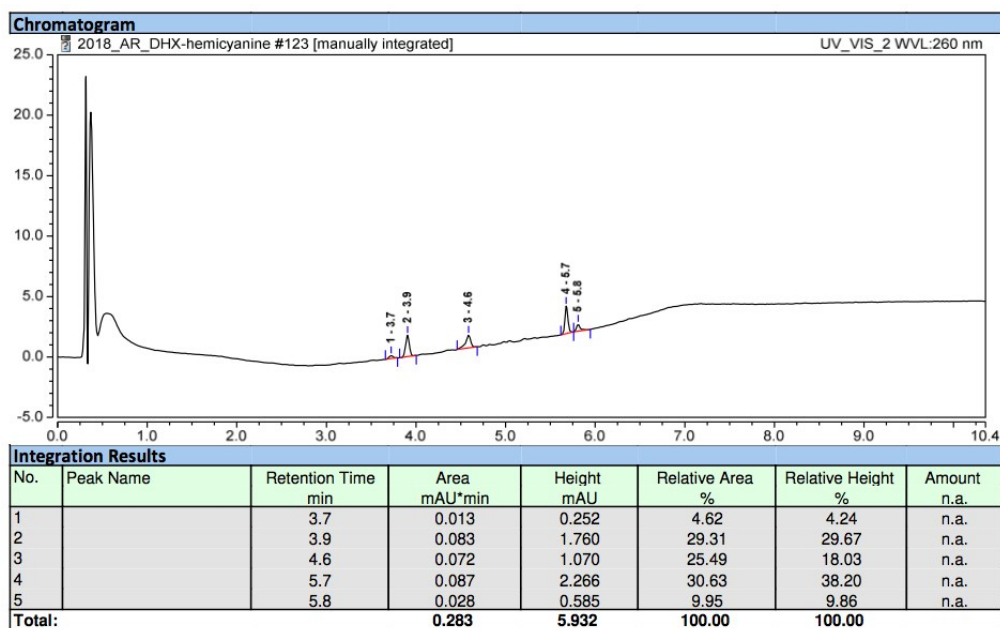

*RP-HPLC elution profile of triazole-based DHX-hemicyanine fused dye **2h** (600 nm)*

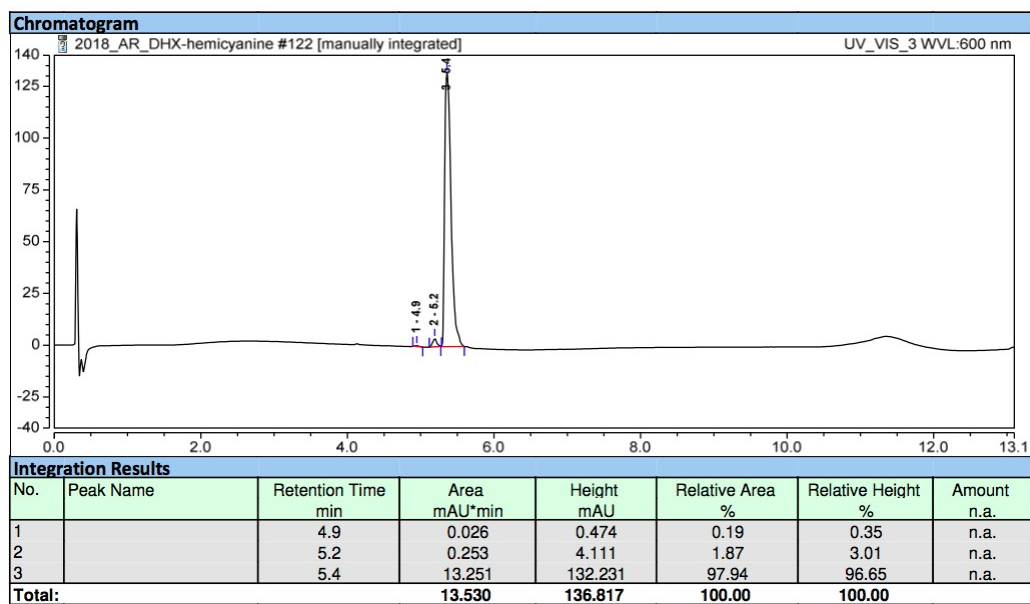

*RP-HPLC elution profile of triazole-based DHX-hemicyanine fused dye 2i (260 nm)*

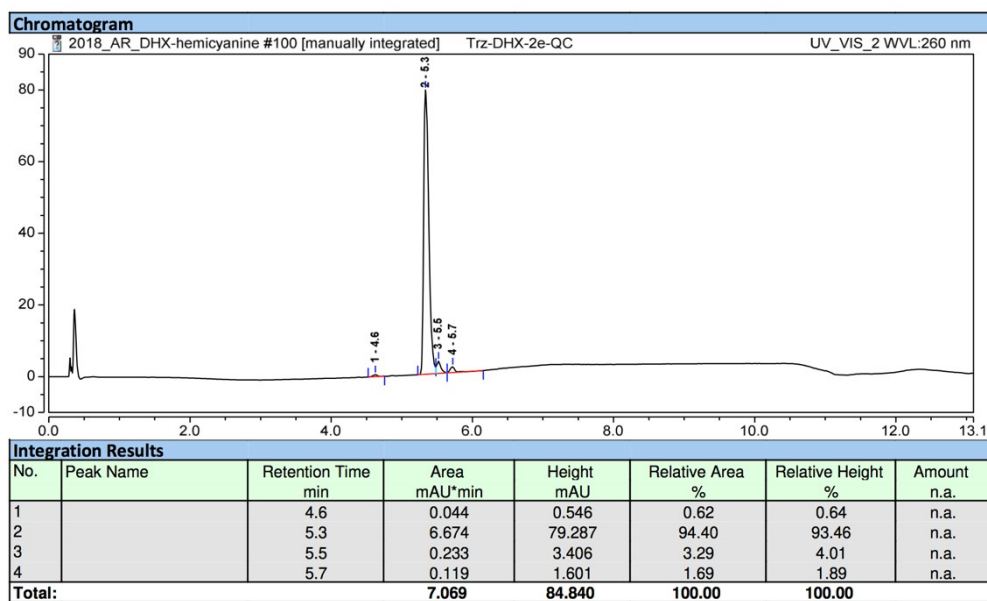

*RP-HPLC elution profile of triazole-based DHX-hemicyanine fused dye 2i (600 nm)*

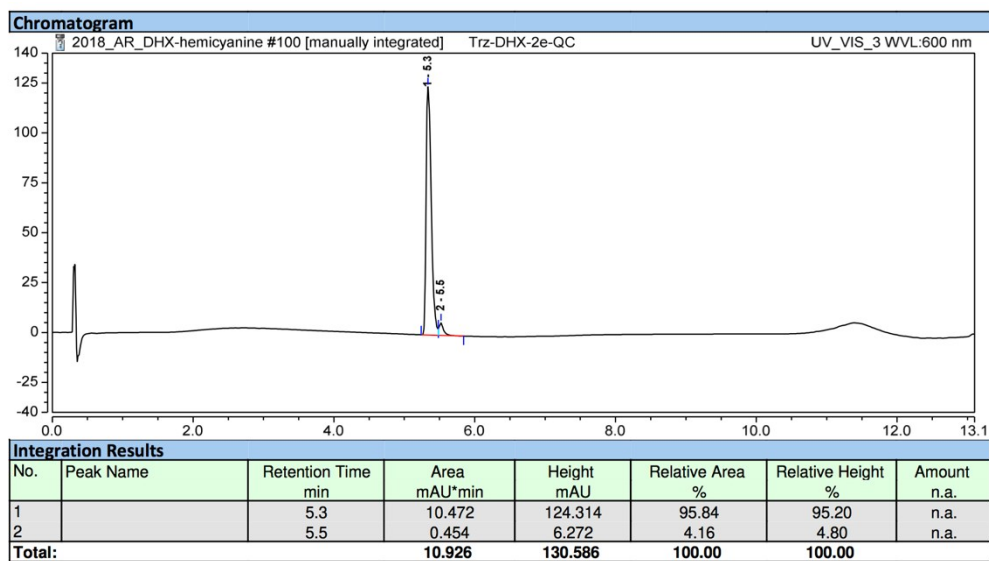

*RP-HPLC elution profile of triazole-based DHX-hemicyanine fused dye 2j (260 nm)*

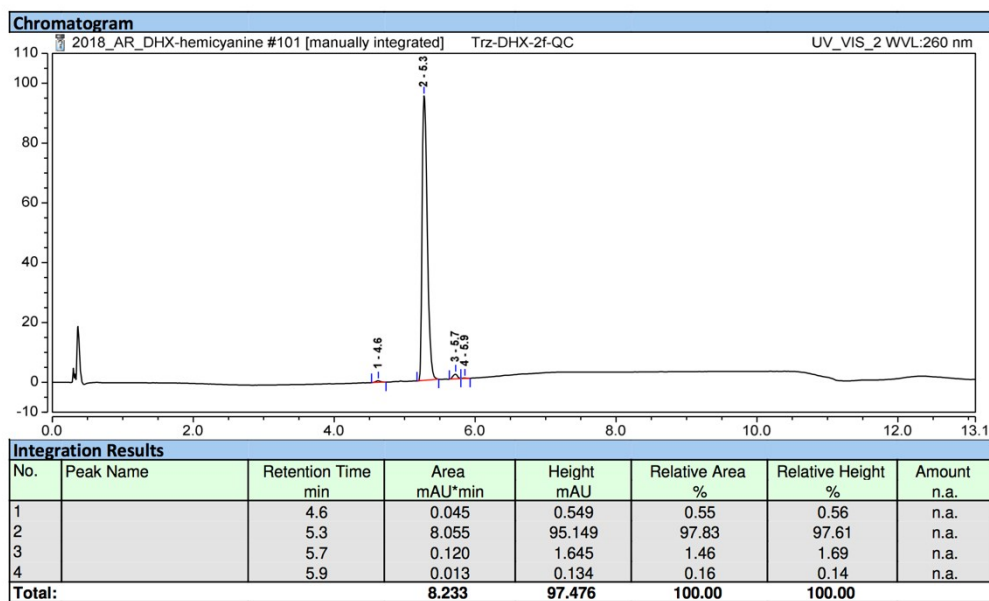

*RP-HPLC elution profile of triazole-based DHX-hemicyanine fused dye 2j (600 nm)*

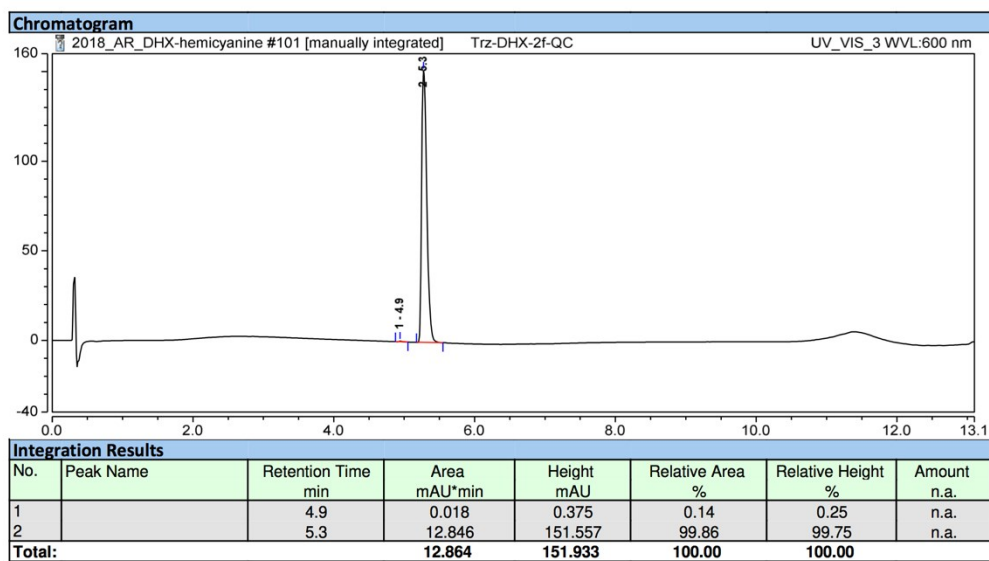

*RP-HPLC elution profile triazole-based DHX-hemicyanine fused dye 2k (system A, 260 nm)*

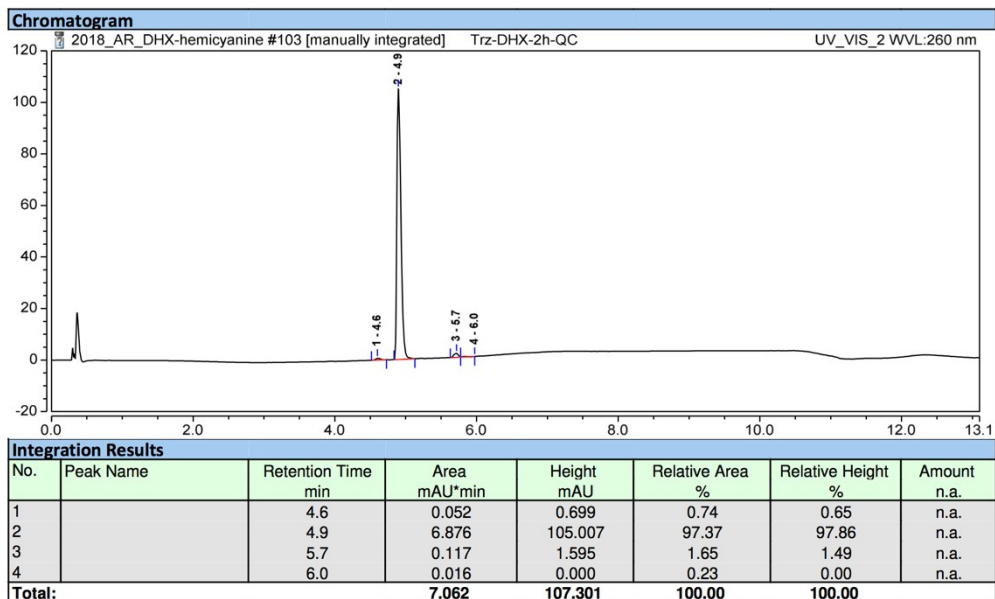

*RP-HPLC elution profile of triazole-based DHX-hemicyanine fused dye 2k (system A, 600 nm)*

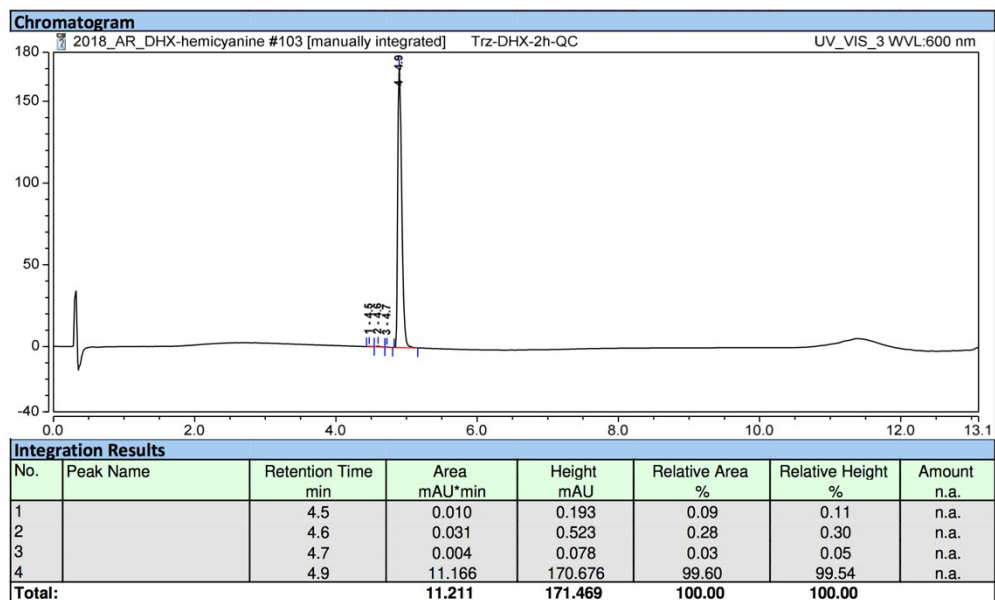

*RP-HPLC elution profile of triazole-based DHX-hemicyanine fused dye 2k (system B, 260 nm)*

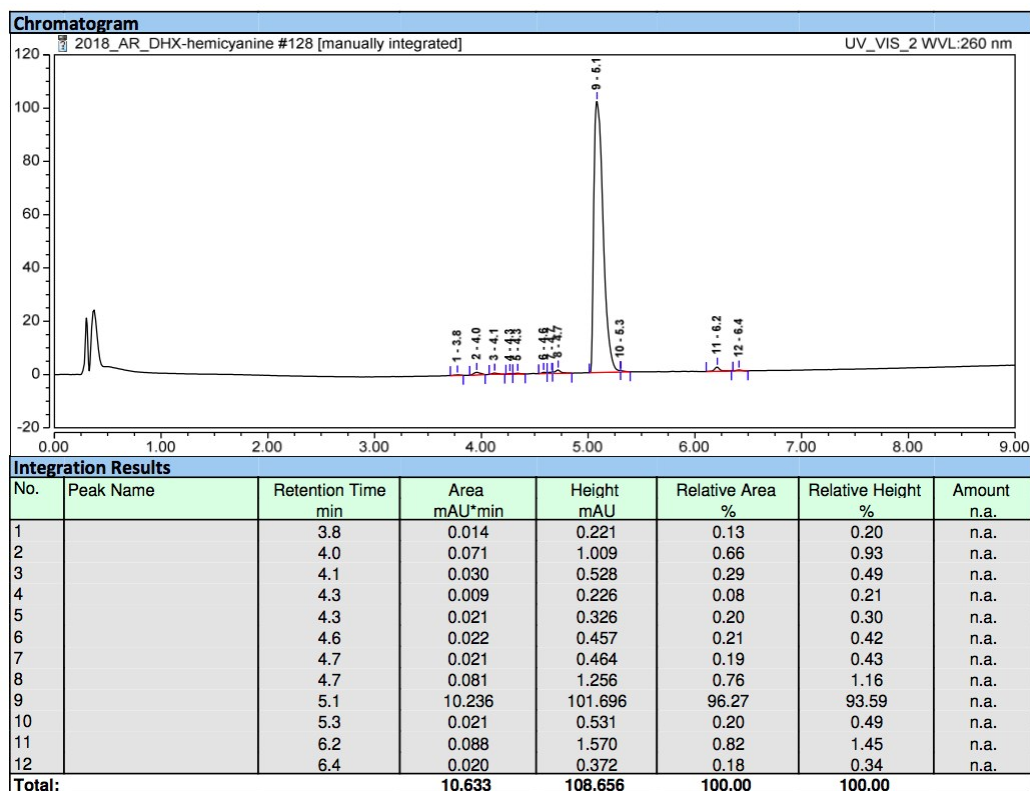

*RP-HPLC elution profile of triazole-based DHX-hemicyanine fused dye 2k (system B, 600 nm)*

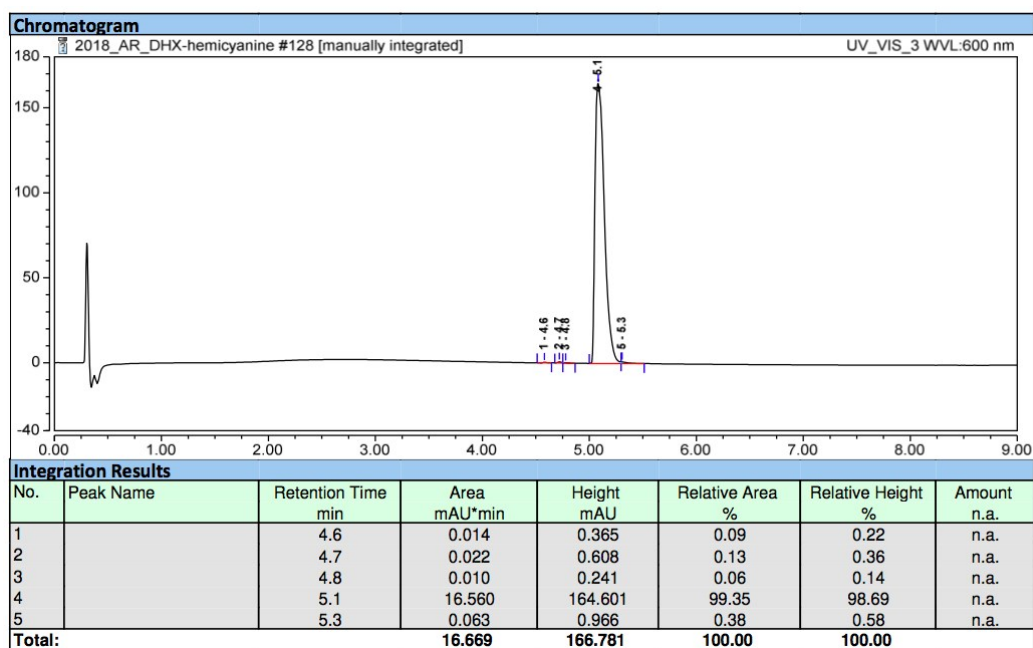



*RP-HPLC elution profile of triazole-based DHX-hemicyanine fused dye 2I (260 nm)*

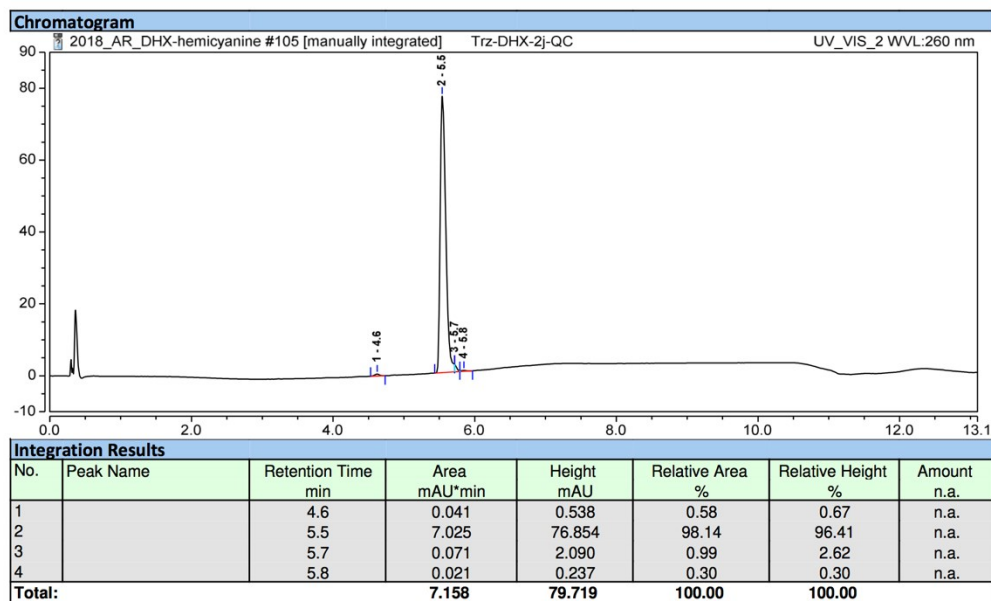

*RP-HPLC elution profile of triazole-based DHX-hemicyanine fused dye 2I (600 nm)*

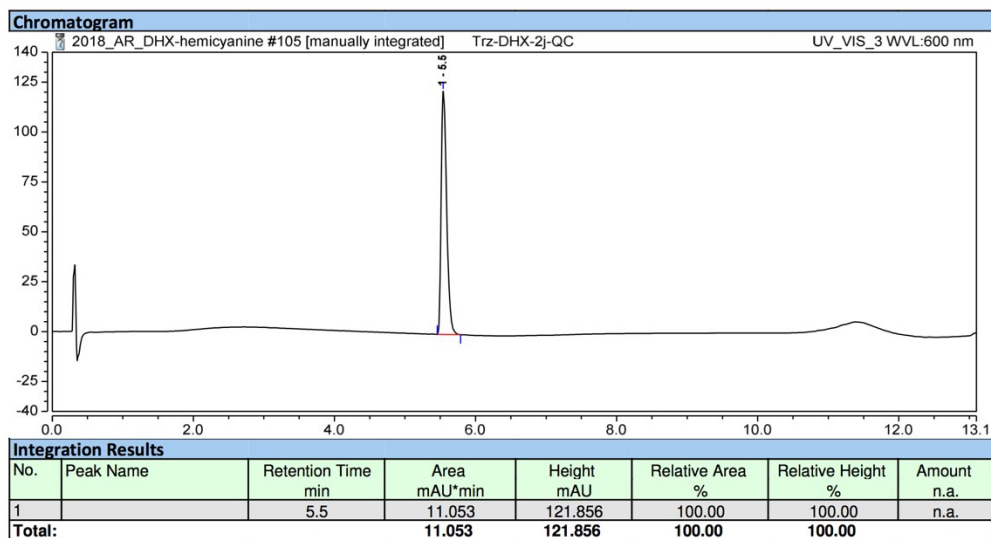

*RP-HPLC elution profile triazole-based DHX-hemicyanine fused dye 2m (260 nm)*

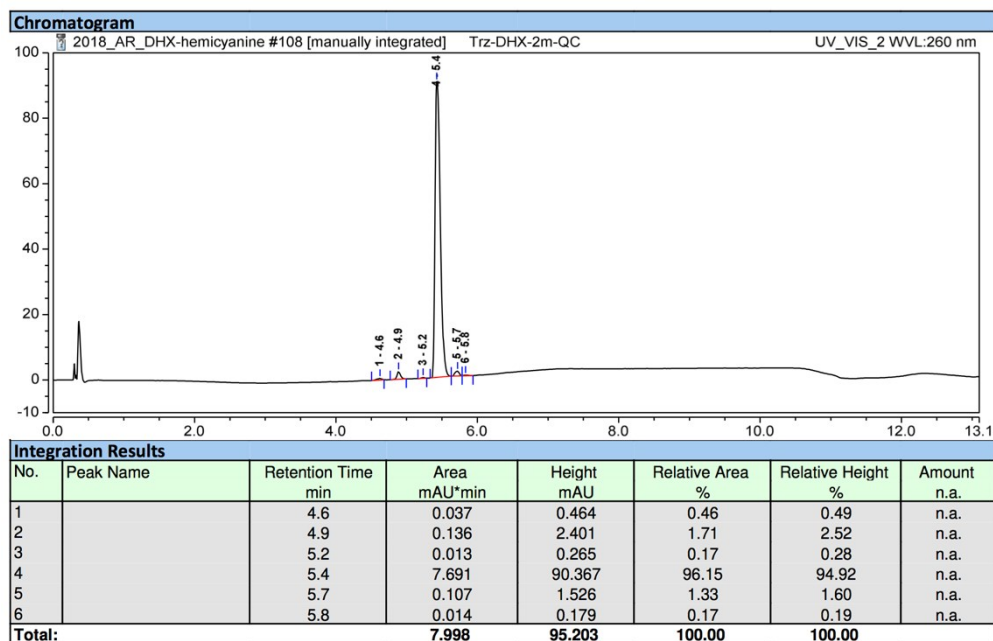

*RP-HPLC elution profile of triazole-based DHX-hemicyanine fused dye 2m (600 nm)*

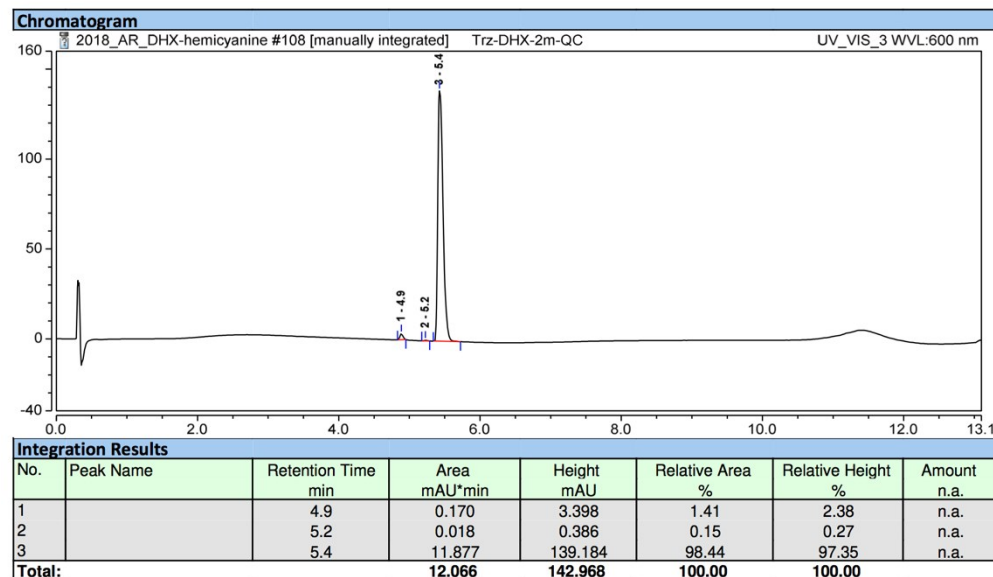

*RP-HPLC elution profile of triazole-based DHX-hemicyanine fused dye 2n (260 nm)*

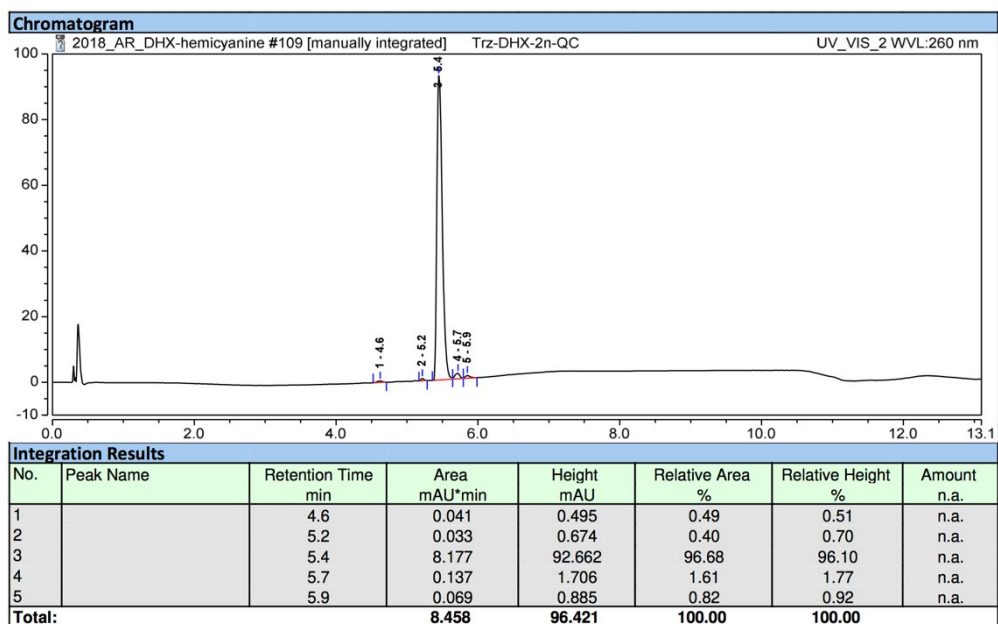

*RP-HPLC elution profile of triazole-based DHX-hemicyanine fused dye 2n (600 nm)*

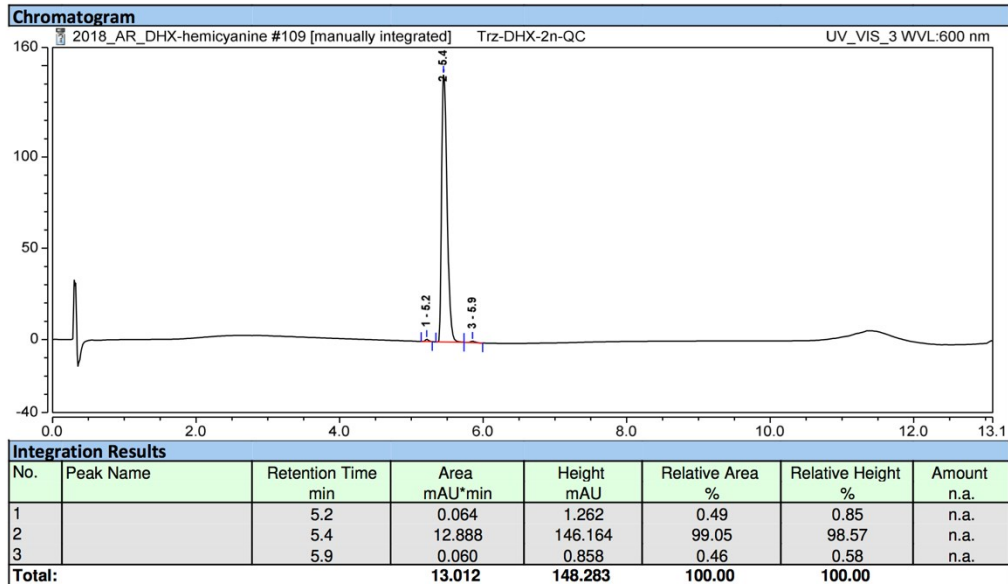

*RP-HPLC elution profile of triazole-based DHX-hemicyanine fused dye 2o (260 nm)*

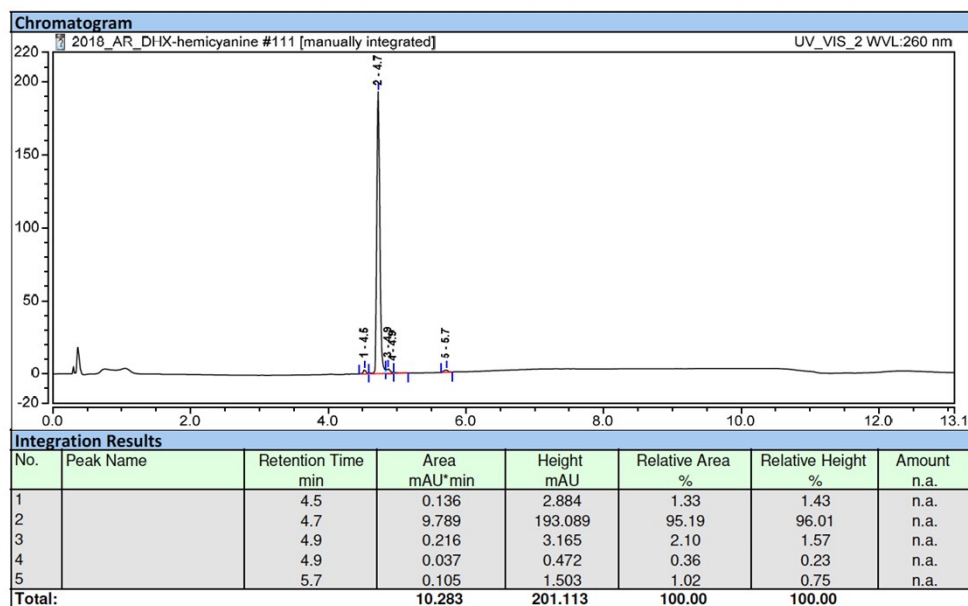

*RP-HPLC elution profile of triazole-based DHX-hemicyanine fused dye 2o (600 nm)*

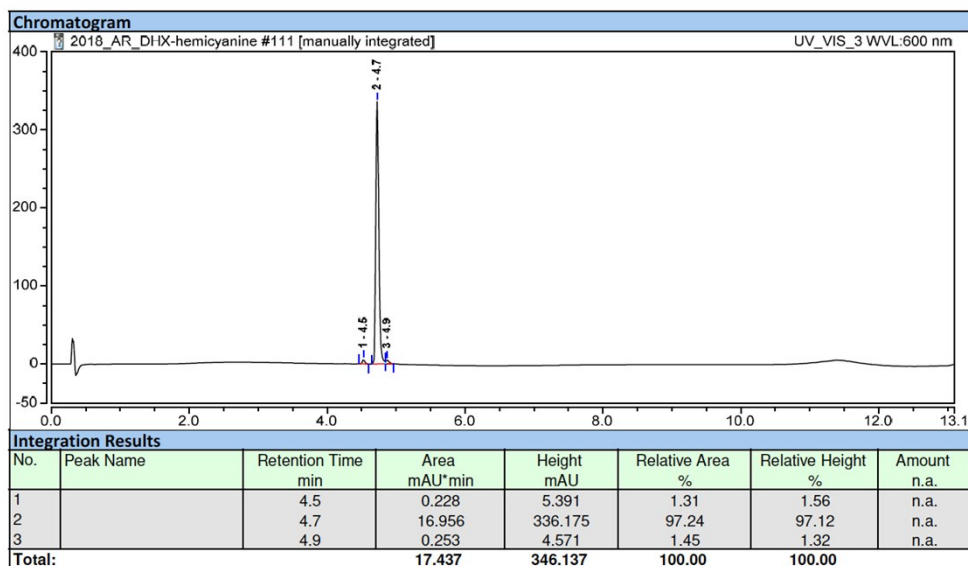

## 7. Photophysical data of DHX-hemicyanine fused dyes (alkyne and triazole derivatives)

*Normalised absorption, excitation (Em at 760 nm), emission (Ex at 620 nm) spectra of alkynyl-based DHX-hemicyanine fused dye 1 in EtOH*

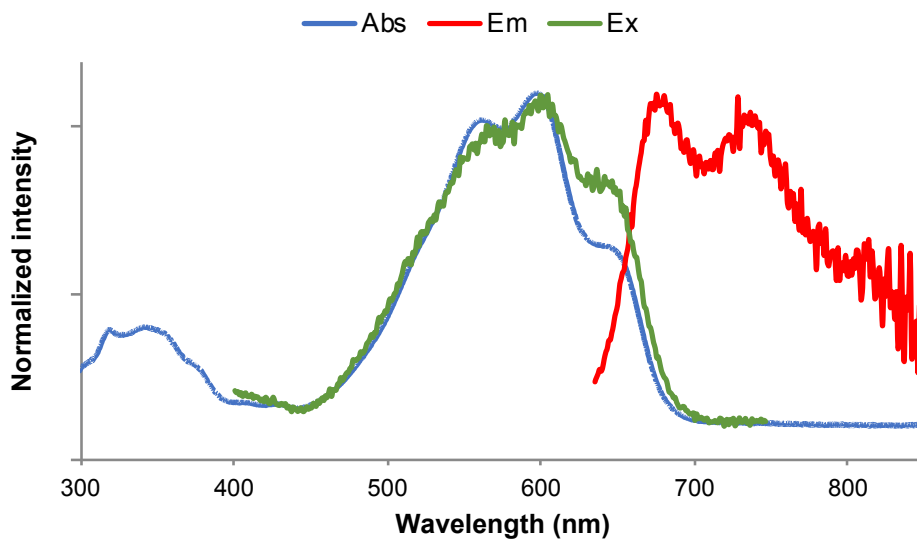

Normalised absorption, excitation (Em at 760 nm), emission (Ex at 620 nm) spectra of triazole-based DHX-hemicyanine fused dye **2a** in CHCl<sub>3</sub> (top), EtOH (middle) and PBS + 5% BSA (bottom)

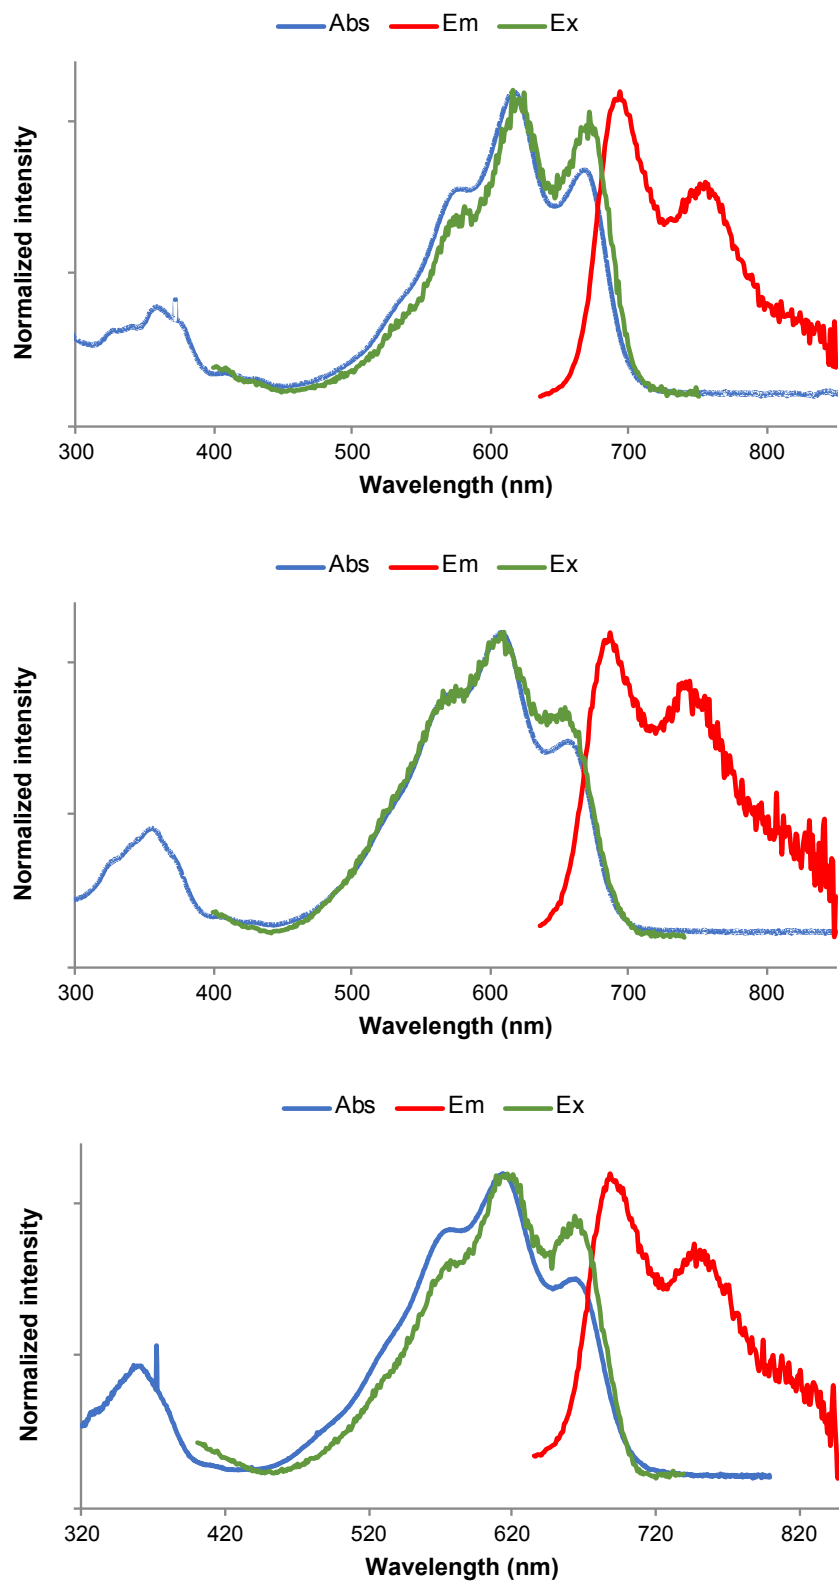

Normalised absorption, excitation (Em at 760 nm), emission (Ex at 620 nm) spectra of triazole-based DHX-hemicyanine fused dye **2b** in CHCl<sub>3</sub> (top), EtOH (middle) and PBS + 5% BSA (bottom)

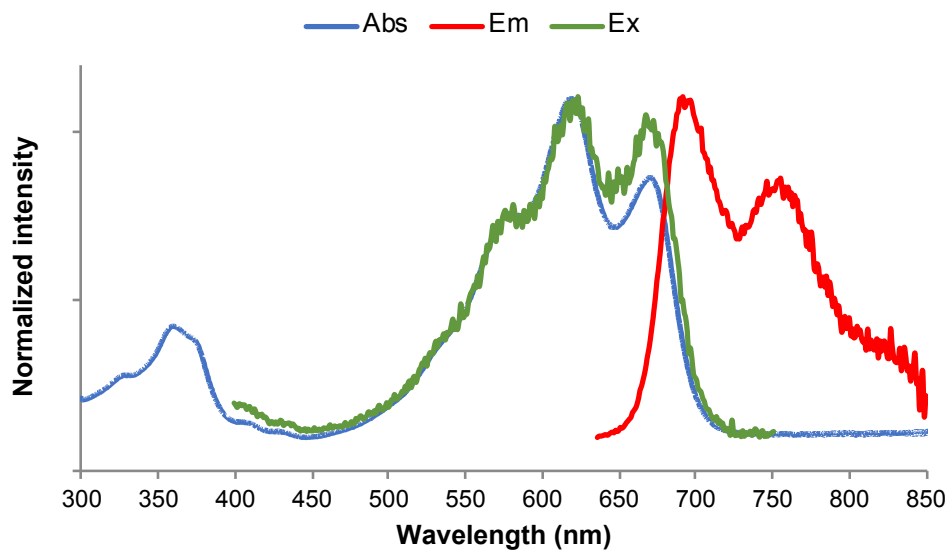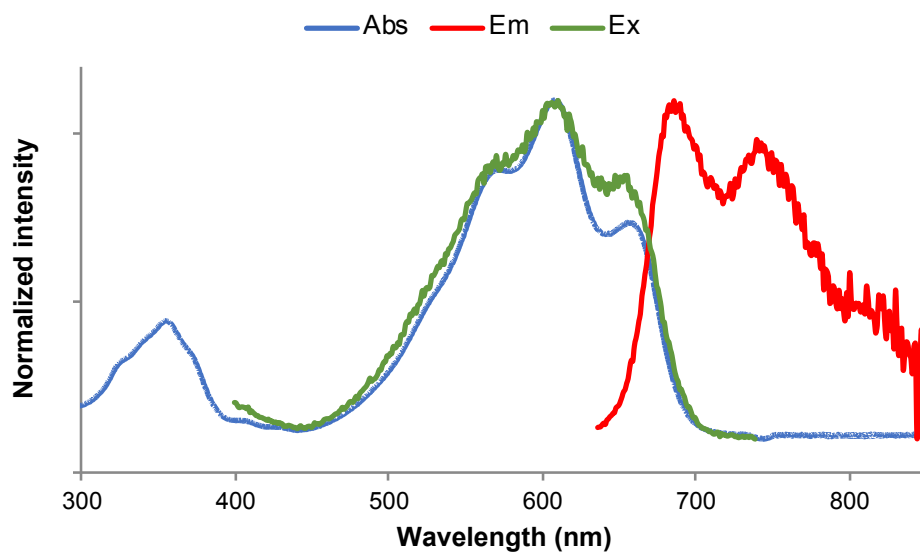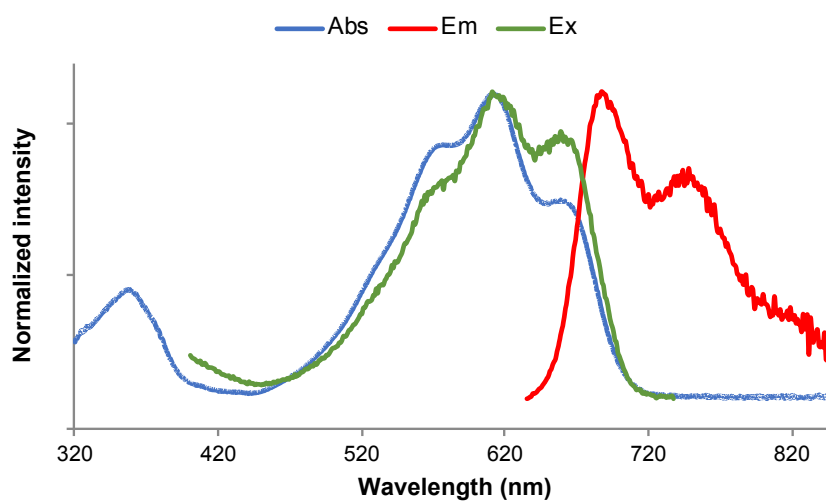

Normalised absorption, excitation (Em at 760 nm), emission (Ex at 620 nm) spectra of triazole-based DHX-hemicyanine fused dye **2c** in  $\text{CHCl}_3$  (top), EtOH (middle) and PBS + 5% BSA (bottom)

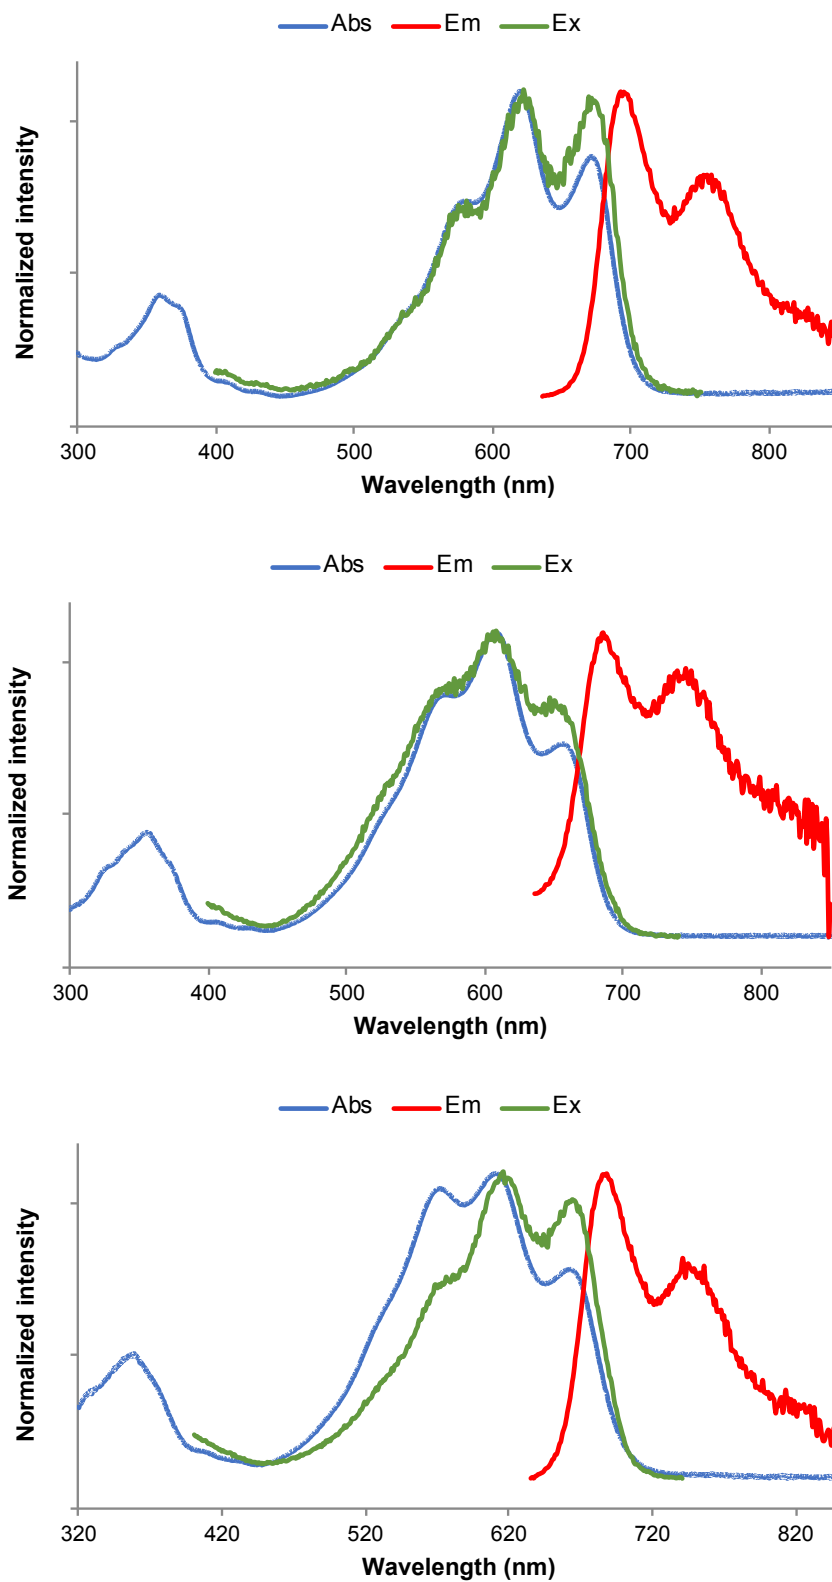



Normalised absorption, excitation (Em at 760 nm), emission (Ex at 620 nm) spectra of triazole-based DHX-hemicyanine fused dye **2d** in CHCl<sub>3</sub> (top), EtOH (middle) and PBS + 5% BSA (bottom)

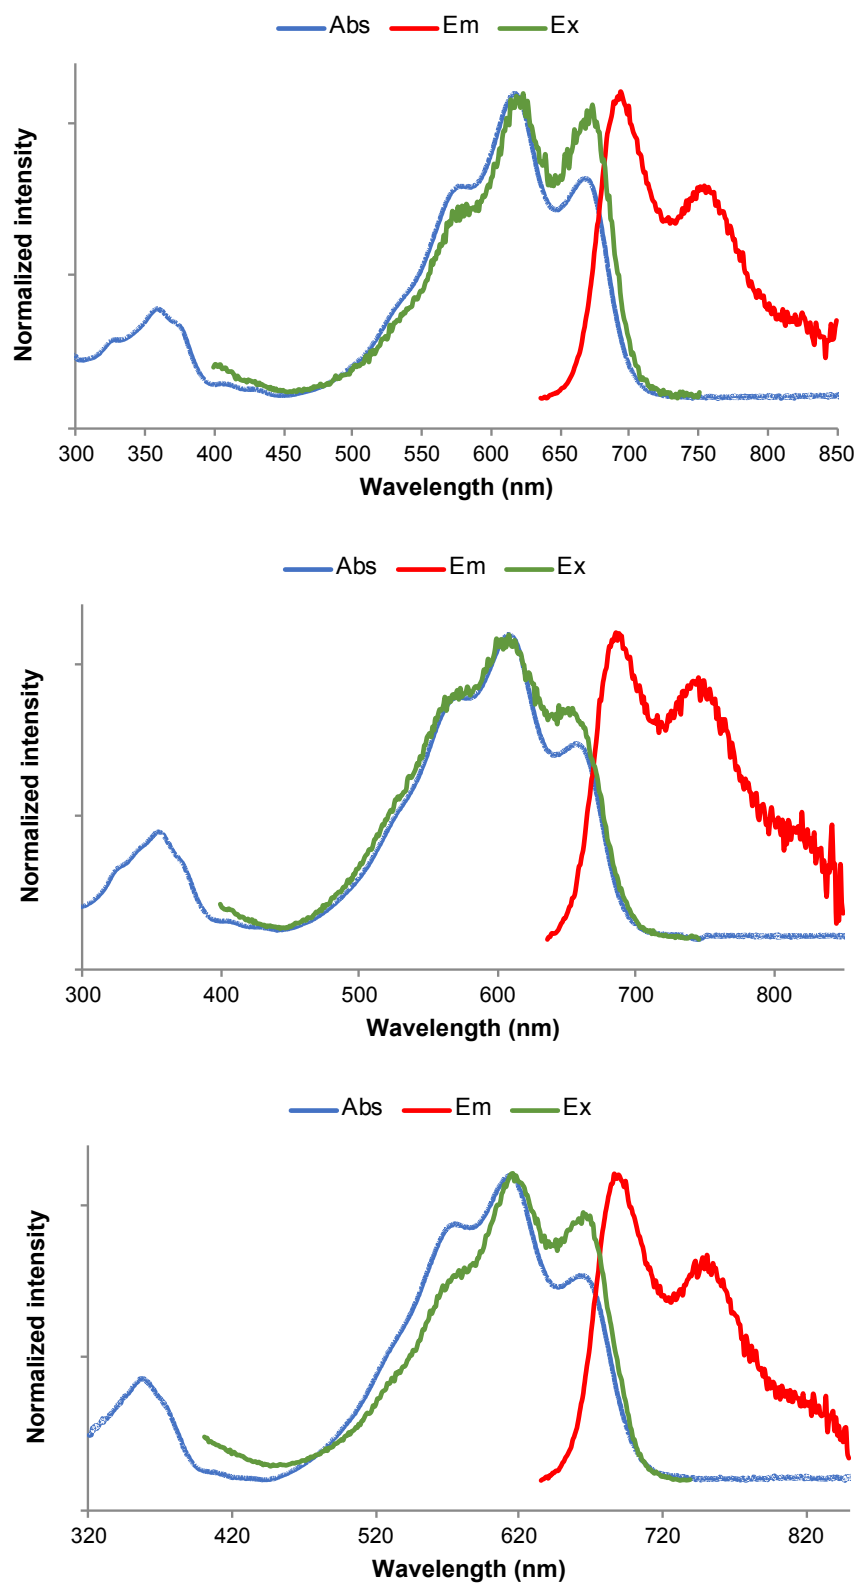

Normalised absorption, excitation (Em at 760 nm), emission (Ex at 620 nm) spectra of triazole-based DHX-hemicyanine fused dye **2e** in CHCl<sub>3</sub> (top), EtOH (middle) and PBS + 5% BSA (bottom)

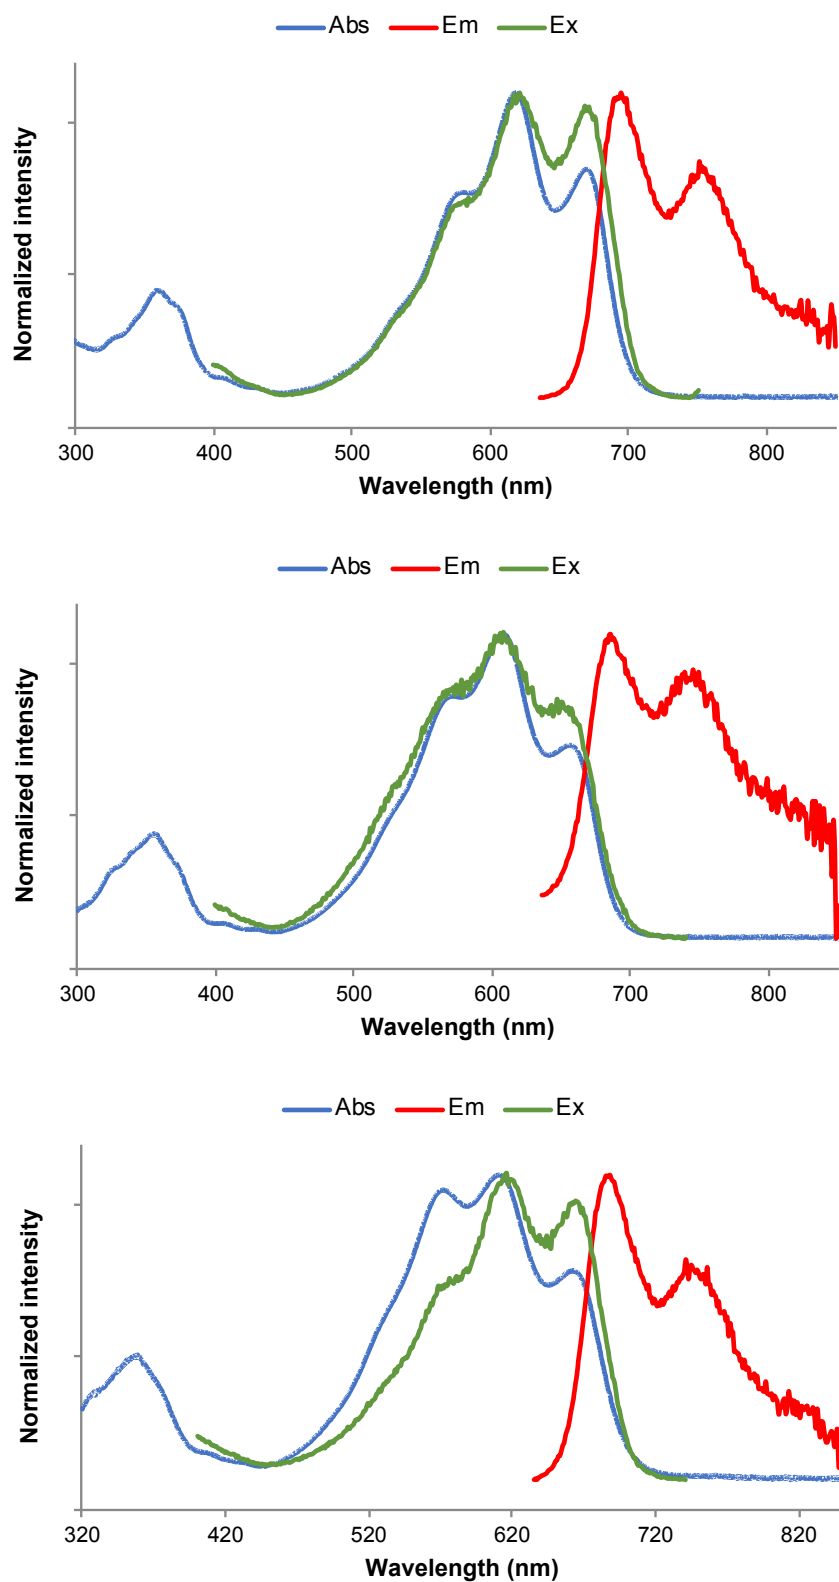

Normalised absorption, excitation (Em at 760 nm), emission (Ex at 620 nm) spectra of triazole-based DHX-hemicyanine fused dye **2f** in CHCl<sub>3</sub> (top), EtOH (middle) and PBS + 5% BSA (bottom)

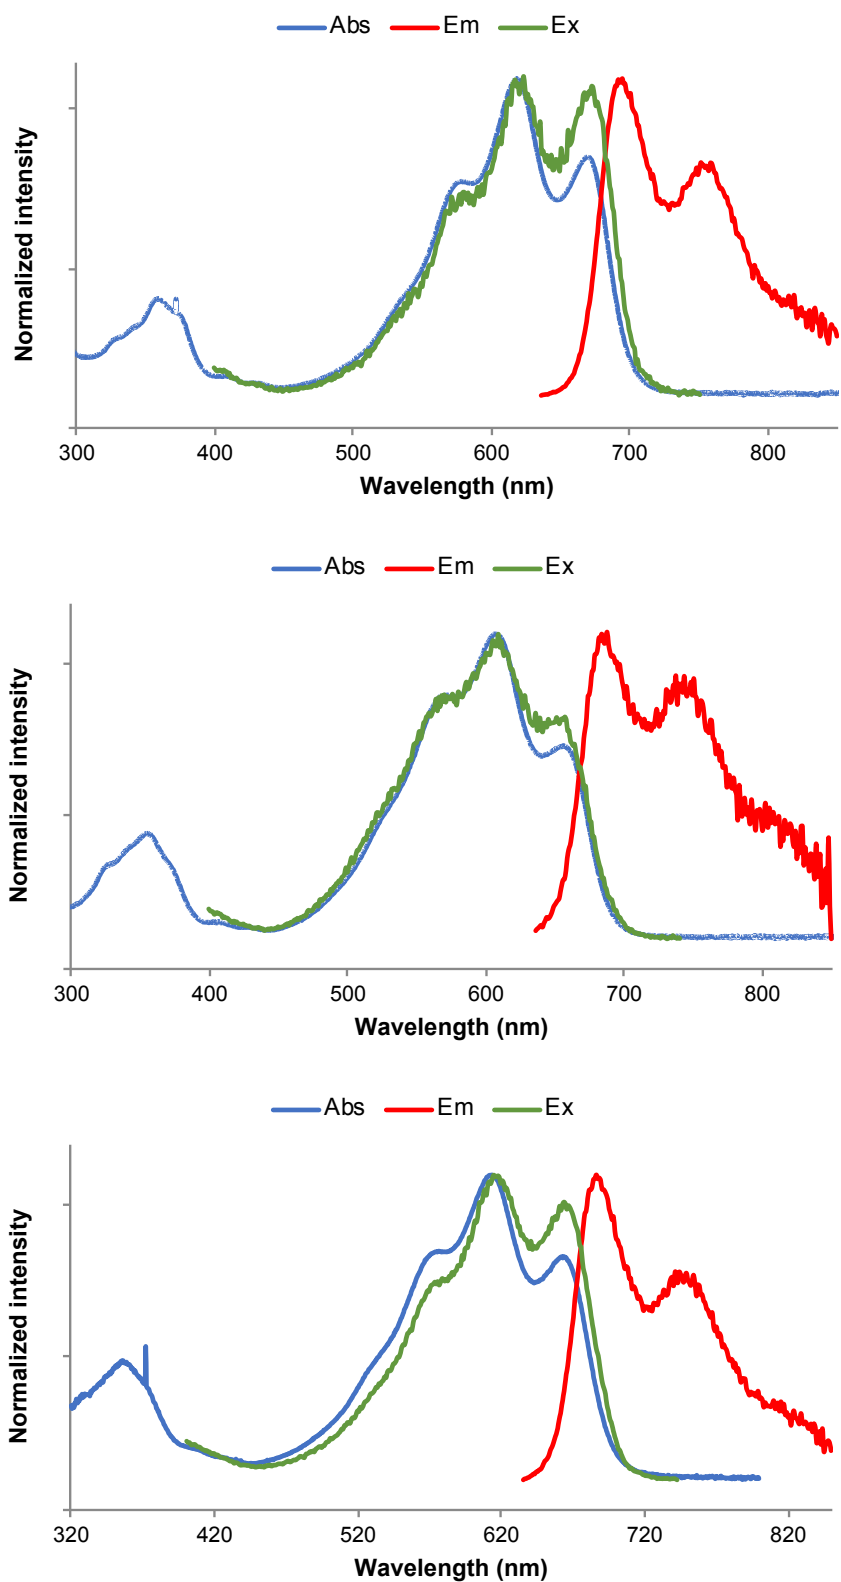

Normalised absorption, excitation (Em at 760 nm), emission (Ex at 620 nm) spectra of triazole-based DHX-hemicyanine fused dye **2g** in CHCl<sub>3</sub> (top), EtOH (middle) and PBS + 5% BSA (bottom)

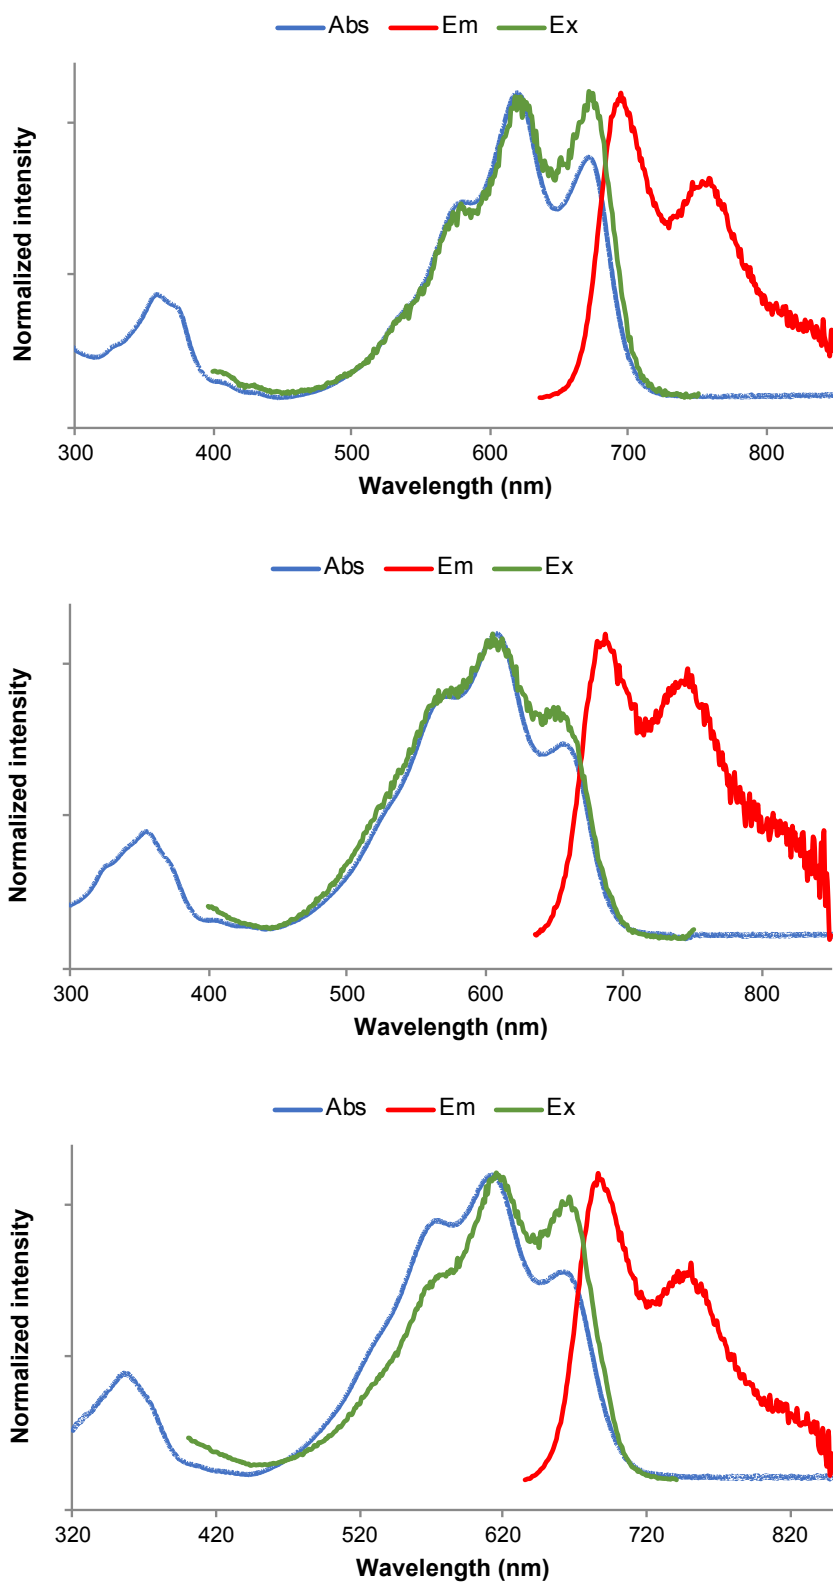

Normalised absorption, excitation (Em at 760 nm), emission (Ex at 620 nm) spectra of

triazole-based DHX-hemicyanine fused dye **2h** in  $\text{CHCl}_3$  (top), EtOH (middle) and PBS + 5% BSA (bottom)

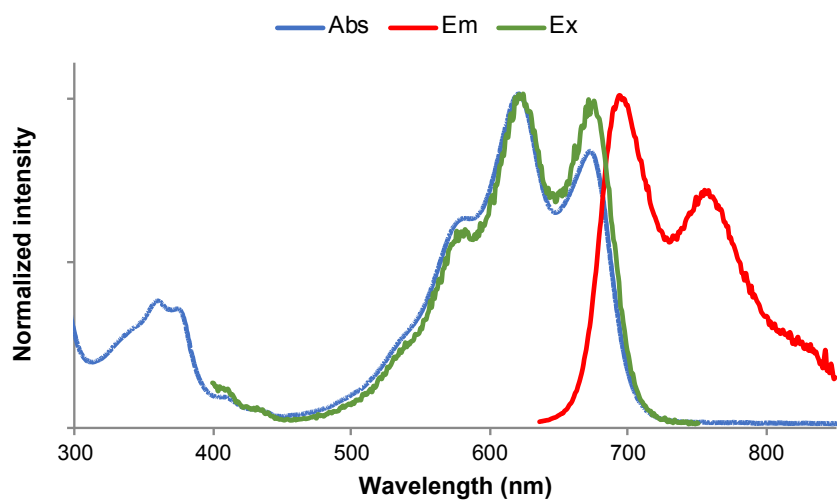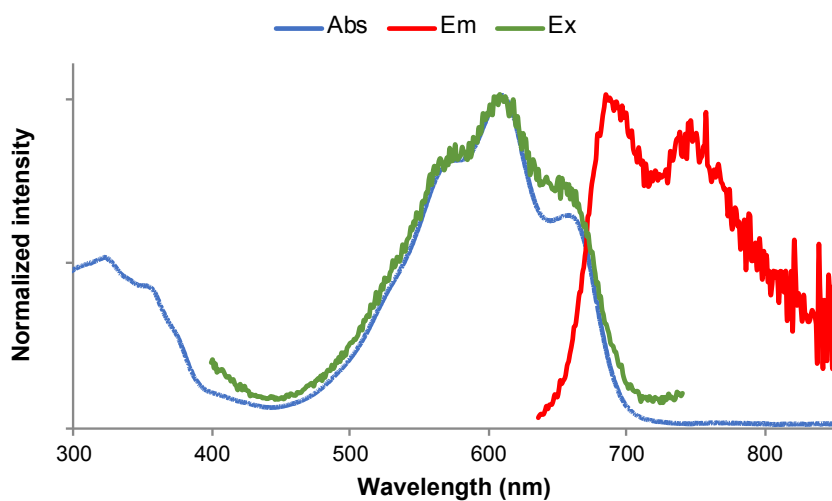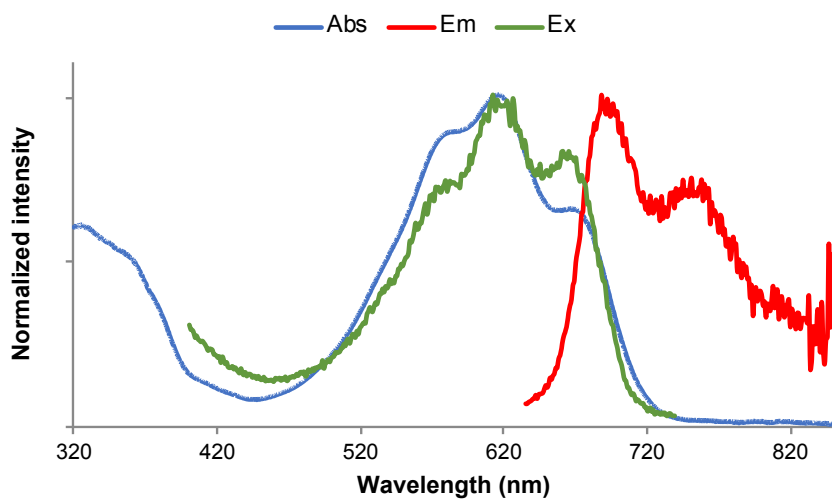

Normalised absorption, excitation (Em at 760 nm), emission (Ex at 620 nm) spectra of triazole-based DHX-hemicyanine fused dye **2i** in  $\text{CHCl}_3$  (top), EtOH (middle) and PBS + 5% BSA (bottom)

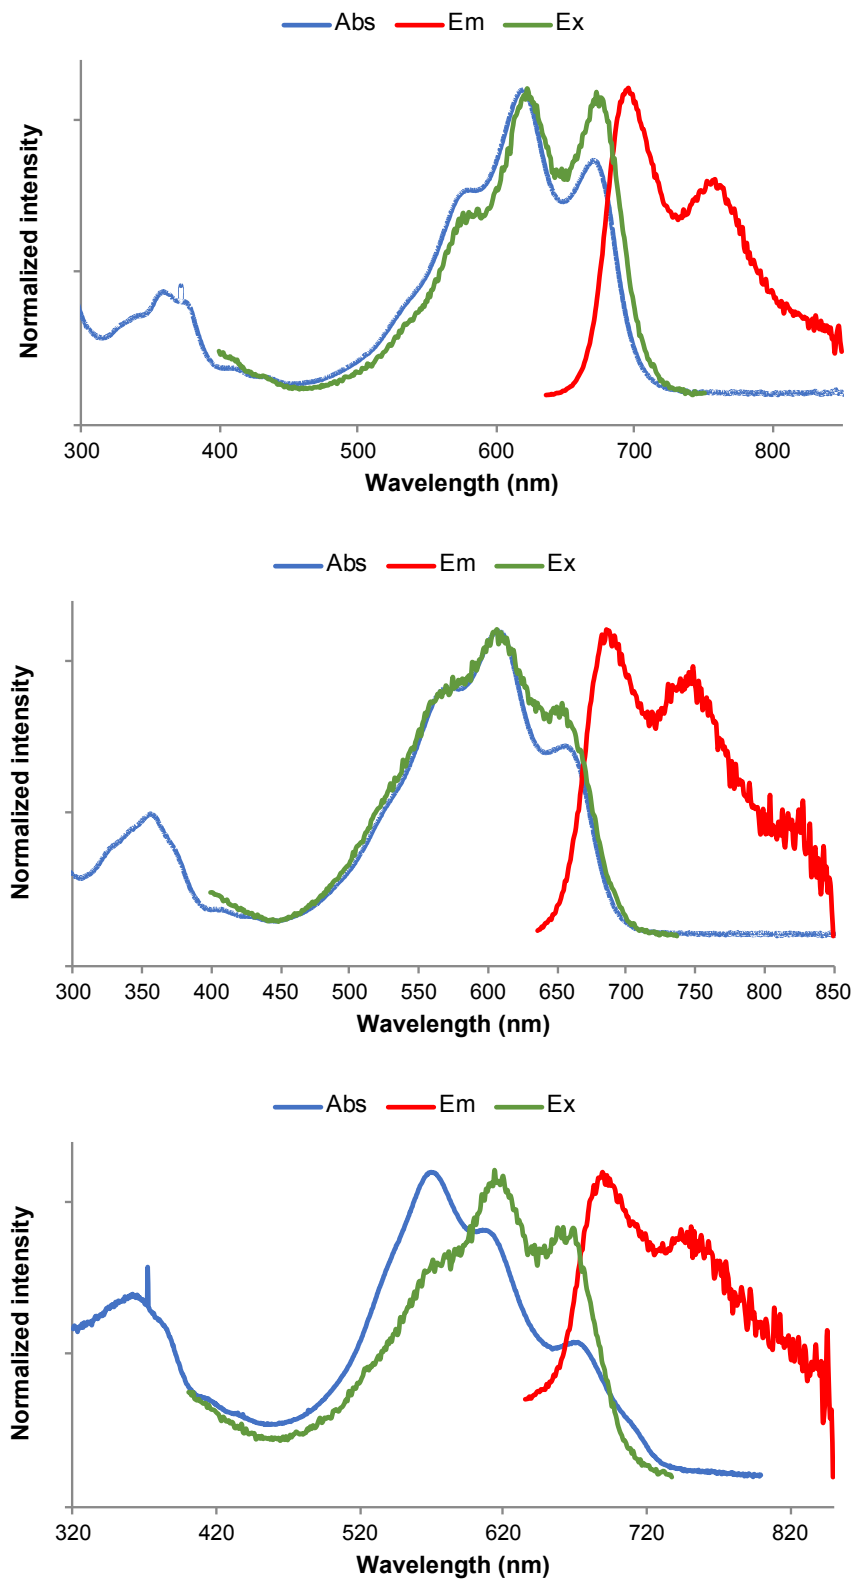

Normalised absorption, excitation (Em at 760 nm), emission (Ex at 620 nm) spectra of triazole-based DHX-hemicyanine fused dye **2j** in CHCl<sub>3</sub> (top), EtOH (middle) and PBS + 5% BSA (bottom)

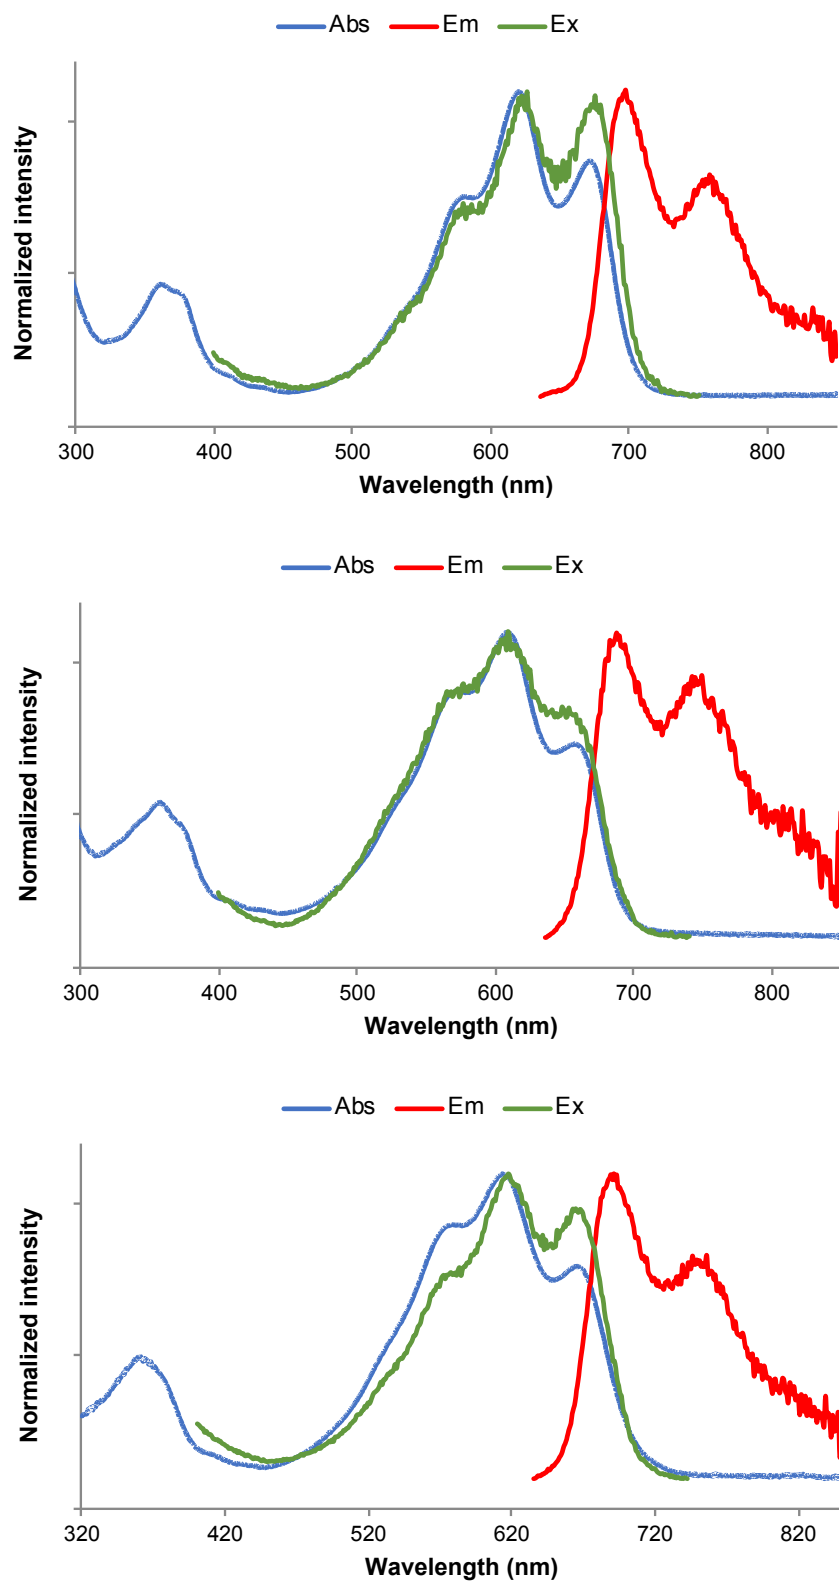

Normalised absorption, excitation (Em at 760 nm), emission (Ex at 620 nm) spectra of triazole-based DHX-hemicyanine fused dye **2k** in CHCl<sub>3</sub> (top), EtOH (middle) and PBS + 5% BSA (bottom)

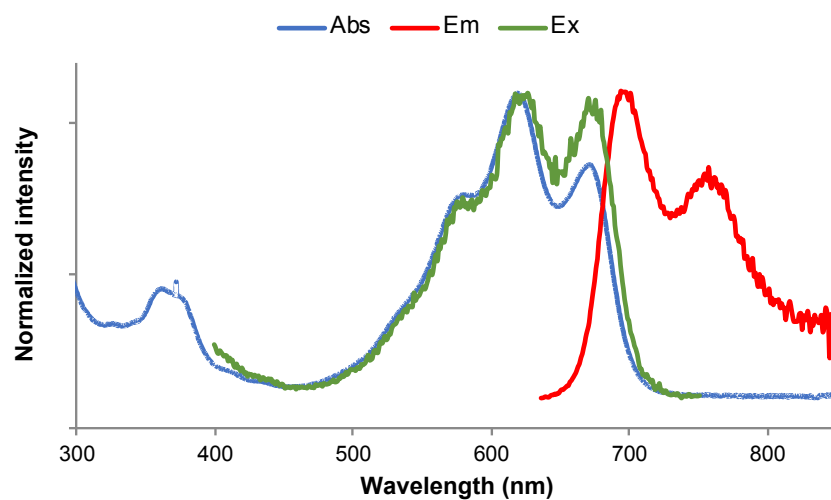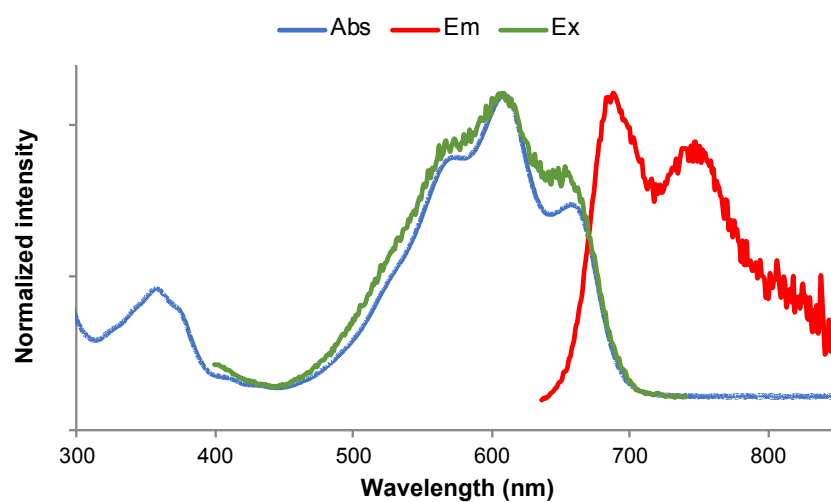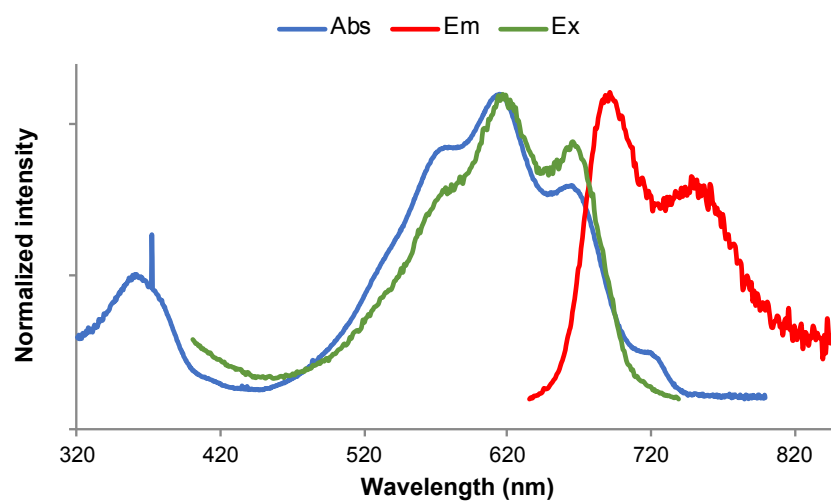



Normalised absorption, excitation (Em at 760 nm), emission (Ex at 620 nm) spectra of triazole-based DHX-hemicyanine fused dye **2I** in CHCl<sub>3</sub> (top), EtOH (middle) and PBS + 5% BSA (bottom)

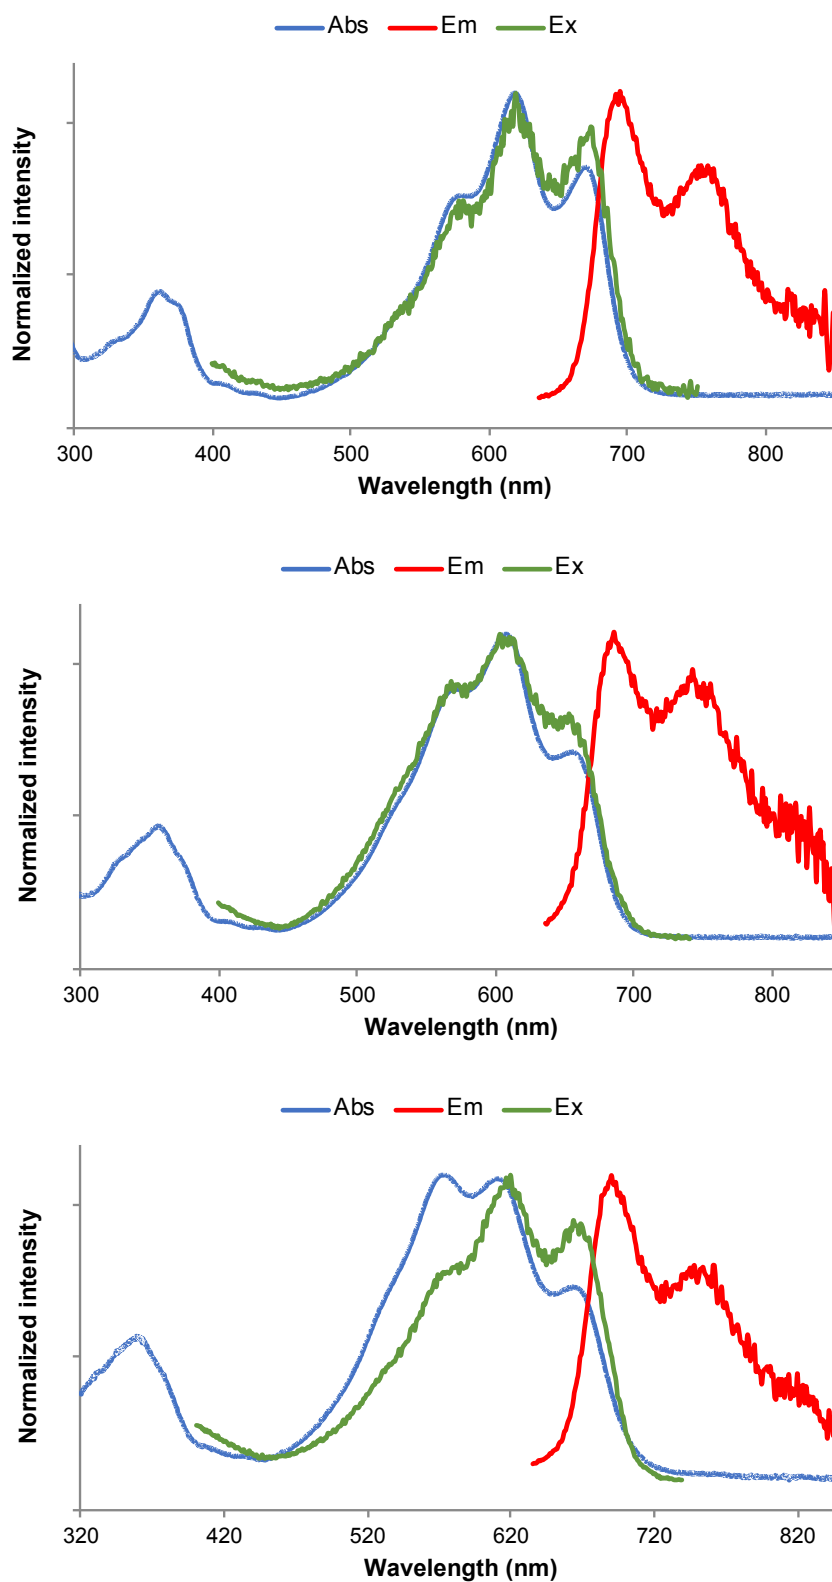

Normalised absorption, excitation (Em at 760 nm), emission (Ex at 620 nm) spectra of triazole-based DHX-hemicyanine fused dye **2m** in  $\text{CHCl}_3$  (top), EtOH (middle) and PBS + 5% BSA (bottom)

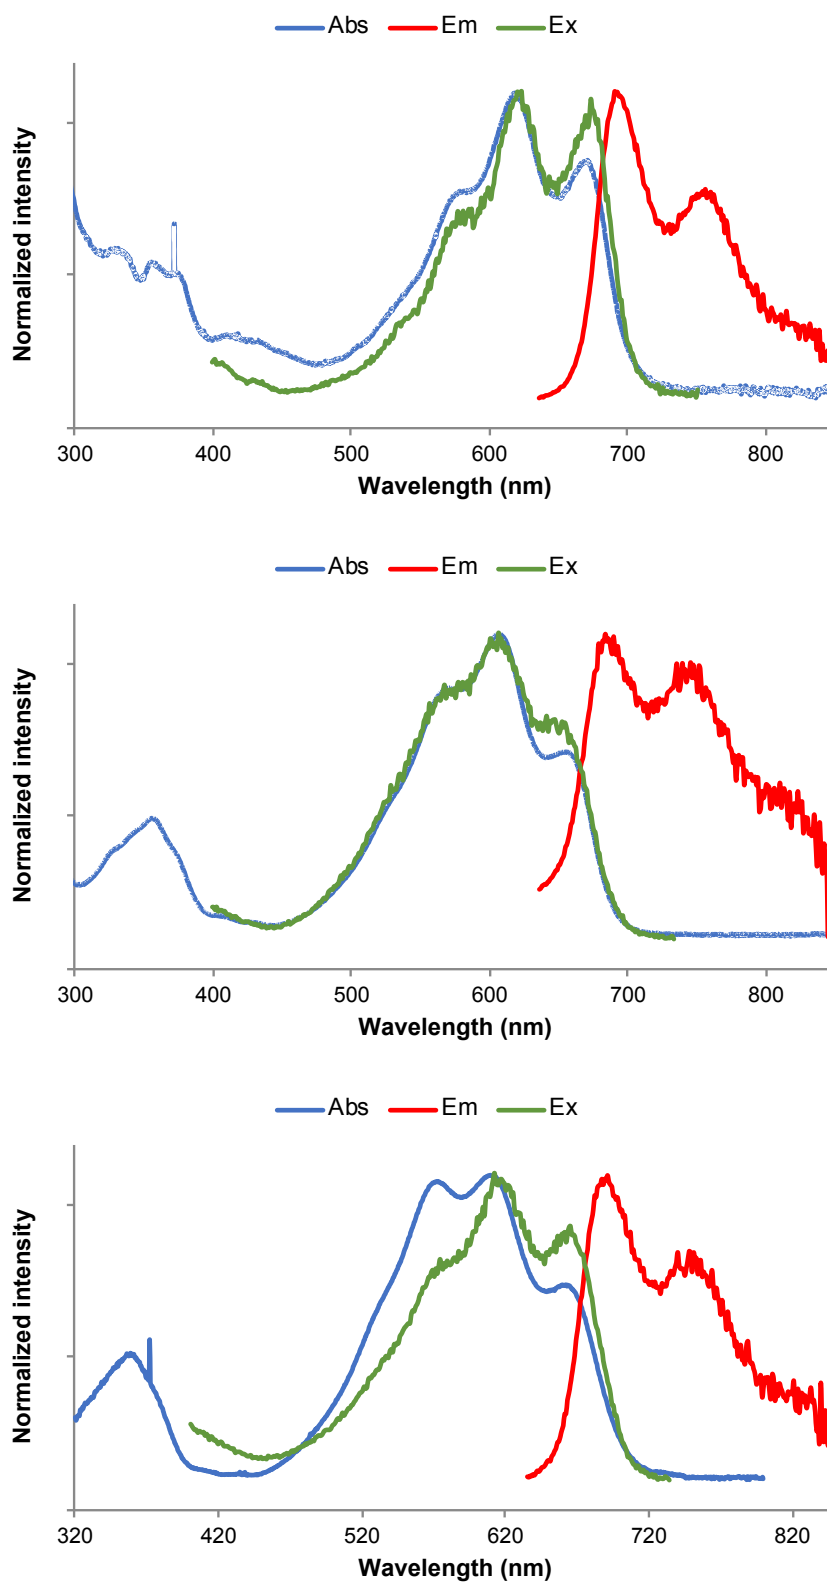

Normalised absorption, excitation (Em at 760 nm), emission (Ex at 620 nm) spectra of triazole-based DHX-hemicyanine fused dye **2n** in CHCl<sub>3</sub> (top), EtOH (middle) and PBS + 5% BSA (bottom)

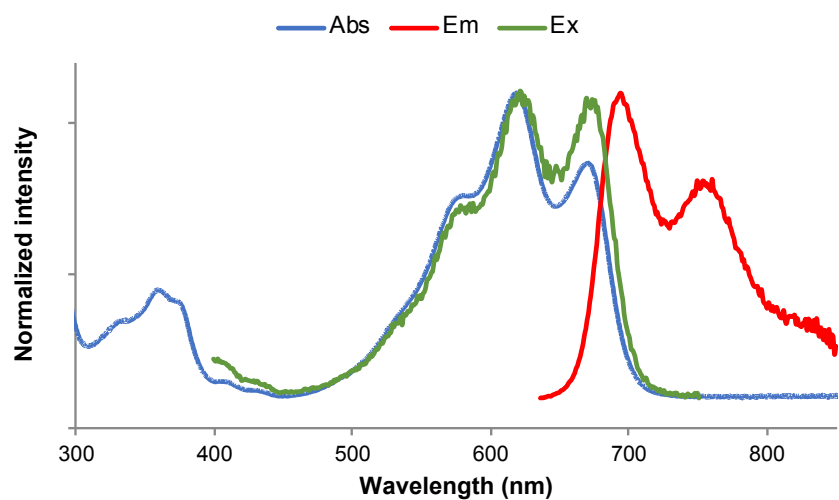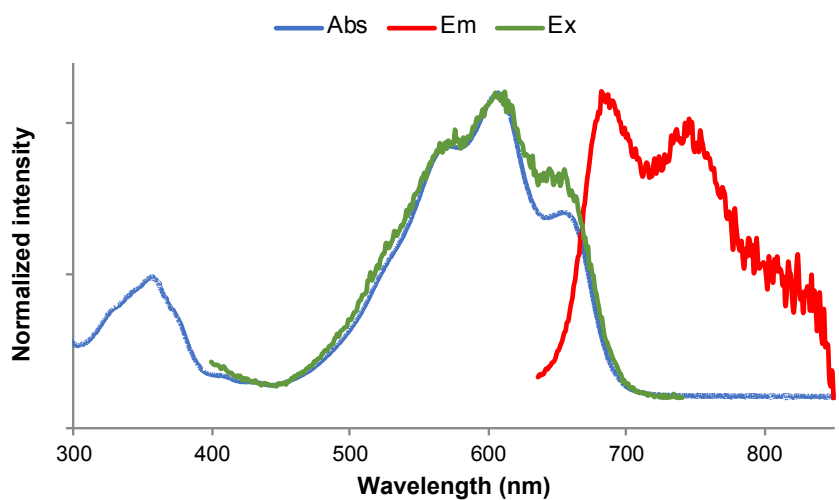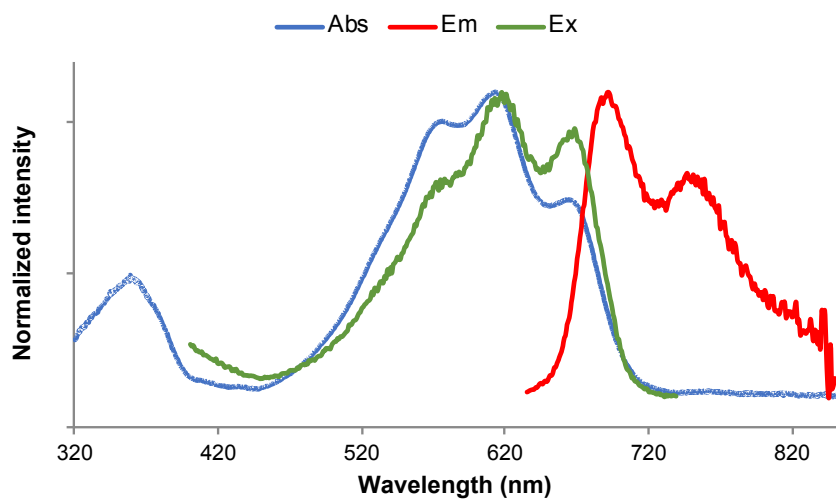

Normalised absorption, excitation (Em at 760 nm), emission (Ex at 620 nm) spectra of triazole-based DHX-hemicyanine fused dye **2o** in EtOH

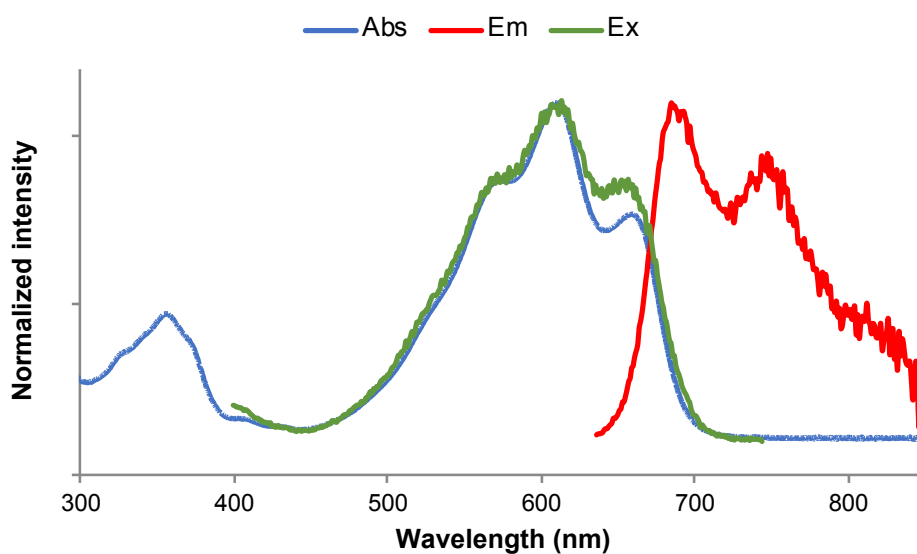

Picture of  $\text{CHCl}_3$  solutions (concentration:  $5.0 \mu\text{M}$ ) of DHX-hemicyanine fused dyes: alkyne **1** (left) and triazole derivative **2o** (right)

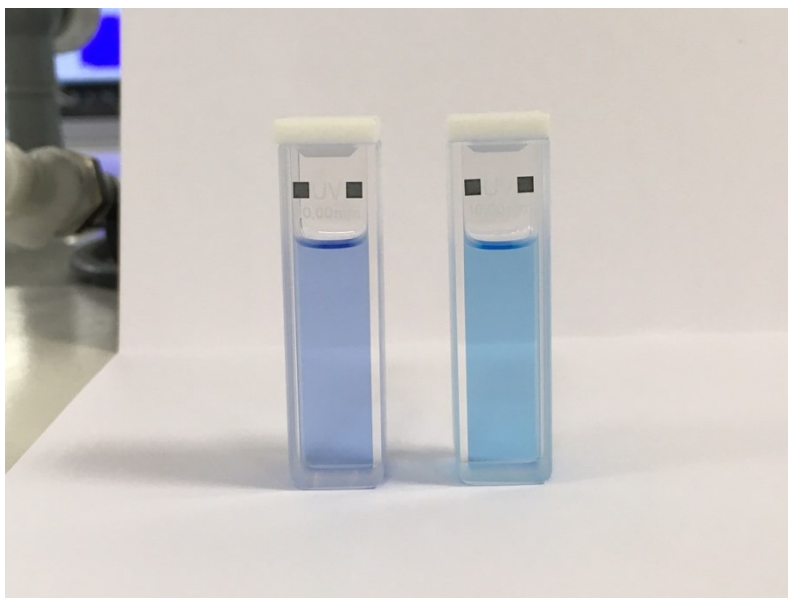

*Picture of PBS + 5% BSA solutions (concentration: 5.0  $\mu$ M) of DHX-hemicyanine fused dyes: alkyne **1** (left) and triazole derivative **2o** (right)*

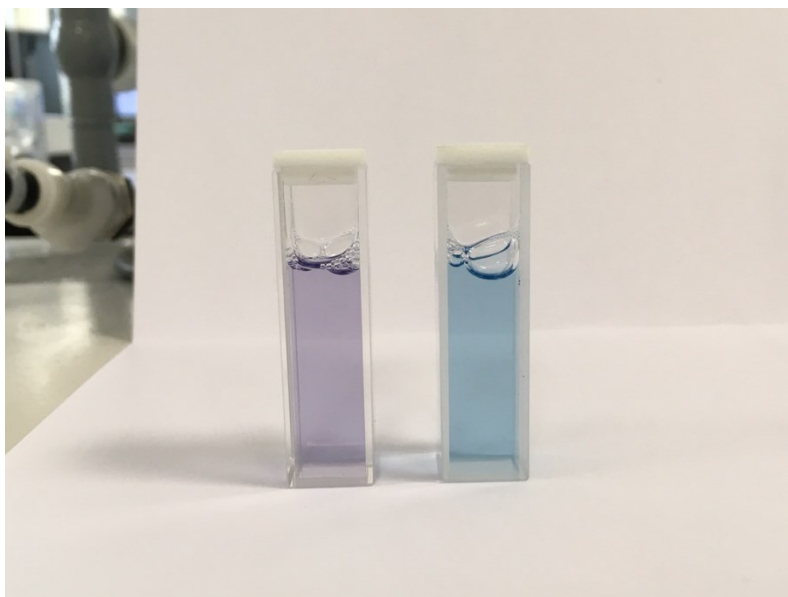

## **8. HRMS data of DHX-hemicyanine fused dyes (alkyne and triazole derivatives)**

## Triazole-based DHX-hemicyanine fused dye 2a

|               |                                                   |                      |          |                                        |                            |
|---------------|---------------------------------------------------|----------------------|----------|----------------------------------------|----------------------------|
| Analysis Info |                                                   |                      |          | Acquisition Date 9/23/2019 11:52:54 AM |                            |
| Analysis Name | D:\Data\IAC TEST\YSY\20190923\15_P1-B-7_01_9370.d |                      |          | Operator                               | Shuyang Yang / XZ          |
| Method        | 20190603-50_3000-pos.m                            |                      |          | Instrument                             | microtof Q II 228888.10387 |
| Sample Name   | 15 RAJAVEL GROUP                                  |                      |          |                                        |                            |
| Focus         | ESI                                               | Ion Polarity         | Positive | Set Nebulizer                          | 0.8 Bar                    |
| Source Type   | Active                                            | Set Capillary        | 3500 V   | Set Dry Heater                         | 180 °C                     |
| Scan End      | 50 m/z                                            | Set End Plate Offset | -500 V   | Set Dry Gas                            | 4.0 l/min                  |

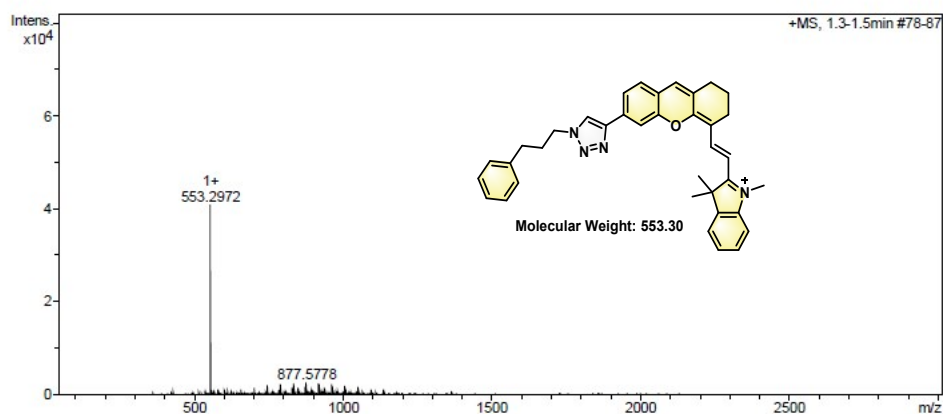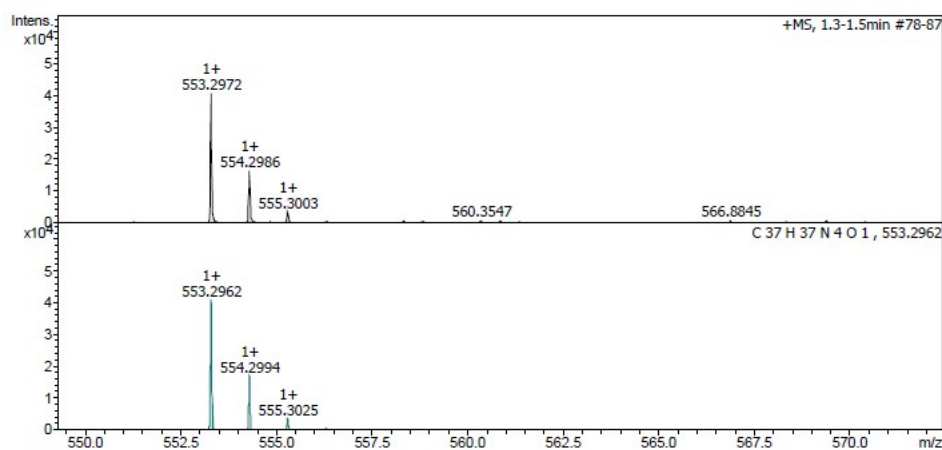

Evaluation Spectra / Validation Formula:

| Meas. m/z  | # | Ion Formula | Score | m/z        | err [mDa] | err [ppm] | mSigma | rdb  | e <sup>-</sup> Conf | N-Rule | Adduct |
|------------|---|-------------|-------|------------|-----------|-----------|--------|------|---------------------|--------|--------|
| 553.297200 | 1 | C37H37N4O   | 80.10 | 553.296188 | 1.0       | 1.8       | 9.5    | 21.5 | even                | ok     | M      |

Calibration Info:

Date: 9/25/2019 4:23:22 PM  
 Polarity: Positive  
 Calibration spectrum: +MS, 4.6-4.7min #274-278: Scan  
 Reference mass list: ESI: Tuning Mix ES-TOF (ESI) (pos)  
 Calibration mode: Enhanced Quadratic

Mass List:

| Reference m/z | Resulting m/z | Intensity | Error [ppm] |
|---------------|---------------|-----------|-------------|
| 118.0863      |               |           |             |
| 322.0481      |               |           |             |
| 622.0290      | 622.0290      | 26078     | 0.097       |
| 922.0098      | 922.0095      | 63479     | -0.366      |
| 1221.9906     | 1221.9910     | 86996     | 0.326       |
| 1521.9715     | 1521.9718     | 80159     | 0.210       |
| 1821.9523     | 1821.9517     | 61558     | -0.362      |
| 2121.9332     | 2121.9332     | 39070     | 0.041       |
| 2421.9140     | 2421.9141     | 6401      | 0.055       |
| 2721.8948     |               |           |             |

Standard deviation: 0.394

| #  | m/z       | Res.  | S/N    | I %   | FWHM   |
|----|-----------|-------|--------|-------|--------|
| 1  | 553.2972  | 14683 | 1729.3 | 100.0 | 0.0377 |
| 2  | 554.2986  | 12900 | 692.4  | 40.1  | 0.0430 |
| 3  | 555.3003  | 11924 | 140.8  | 8.2   | 0.0466 |
| 4  | 613.4204  | 12288 | 33.1   | 2.2   | 0.0499 |
| 5  | 657.4491  | 11435 | 38.1   | 2.7   | 0.0575 |
| 6  | 701.4750  | 12249 | 51.3   | 3.8   | 0.0573 |
| 7  | 745.5021  | 14241 | 66.9   | 5.2   | 0.0523 |
| 8  | 746.5052  | 12770 | 26.7   | 2.1   | 0.0585 |
| 9  | 785.5056  | 9518  | 27.8   | 2.3   | 0.0825 |
| 10 | 789.5264  | 12708 | 66.7   | 5.5   | 0.0621 |
| 11 | 790.5288  | 14568 | 35.0   | 2.9   | 0.0543 |
| 12 | 829.5276  | 12611 | 43.1   | 3.7   | 0.0658 |
| 13 | 831.5024  | 12395 | 25.6   | 2.2   | 0.0671 |
| 14 | 833.5533  | 13364 | 72.7   | 6.2   | 0.0624 |
| 15 | 834.5573  | 13861 | 37.7   | 3.2   | 0.0602 |
| 16 | 872.6228  | 12994 | 24.6   | 2.2   | 0.0672 |
| 17 | 873.5543  | 11245 | 50.8   | 4.5   | 0.0777 |
| 18 | 874.5534  | 12527 | 28.9   | 2.6   | 0.0698 |
| 19 | 875.5314  | 12326 | 32.1   | 2.8   | 0.0710 |
| 20 | 877.5778  | 13014 | 73.6   | 6.5   | 0.0674 |
| 21 | 878.5823  | 12677 | 34.9   | 3.1   | 0.0693 |
| 22 | 893.5522  | 14163 | 26.9   | 2.4   | 0.0631 |
| 23 | 897.5357  | 12660 | 25.1   | 2.3   | 0.0709 |
| 24 | 917.5760  | 13493 | 66.6   | 6.0   | 0.0680 |
| 25 | 918.5788  | 11569 | 28.5   | 2.6   | 0.0794 |
| 26 | 919.5573  | 11271 | 26.1   | 2.4   | 0.0816 |
| 27 | 921.6041  | 12926 | 62.7   | 5.7   | 0.0713 |
| 28 | 922.6062  | 13127 | 33.8   | 3.1   | 0.0703 |
| 29 | 937.5769  | 12747 | 23.0   | 2.1   | 0.0736 |
| 30 | 961.6011  | 12677 | 60.4   | 5.6   | 0.0759 |
| 31 | 962.6024  | 13625 | 35.0   | 3.3   | 0.0706 |
| 32 | 963.5901  | 12360 | 23.3   | 2.2   | 0.0780 |
| 33 | 965.6291  | 13186 | 49.0   | 4.6   | 0.0732 |
| 34 | 966.6290  | 12987 | 26.0   | 2.4   | 0.0744 |
| 35 | 1005.6267 | 13589 | 51.9   | 5.0   | 0.0740 |
| 36 | 1006.6295 | 13455 | 28.0   | 2.7   | 0.0748 |
| 37 | 1009.6518 | 12958 | 32.7   | 3.1   | 0.0779 |
| 38 | 1049.6535 | 13547 | 42.2   | 4.1   | 0.0775 |
| 39 | 1053.6786 | 13898 | 21.5   | 2.1   | 0.0758 |
| 40 | 1093.6812 | 13105 | 29.9   | 3.0   | 0.0835 |

  

| # | m/z      | Res.  | S/N | I %   | FWHM   |
|---|----------|-------|-----|-------|--------|
| 1 | 553.2962 | 14683 |     | 100.0 | 0.0377 |
| 2 | 554.2994 | 14709 |     | 41.9  | 0.0377 |
| 3 | 555.3025 | 14736 |     | 8.8   | 0.0377 |
| 4 | 556.3056 | 14762 |     | 1.2   | 0.0377 |

## Triazole-based DHX-hemicyanine fused dye 2b

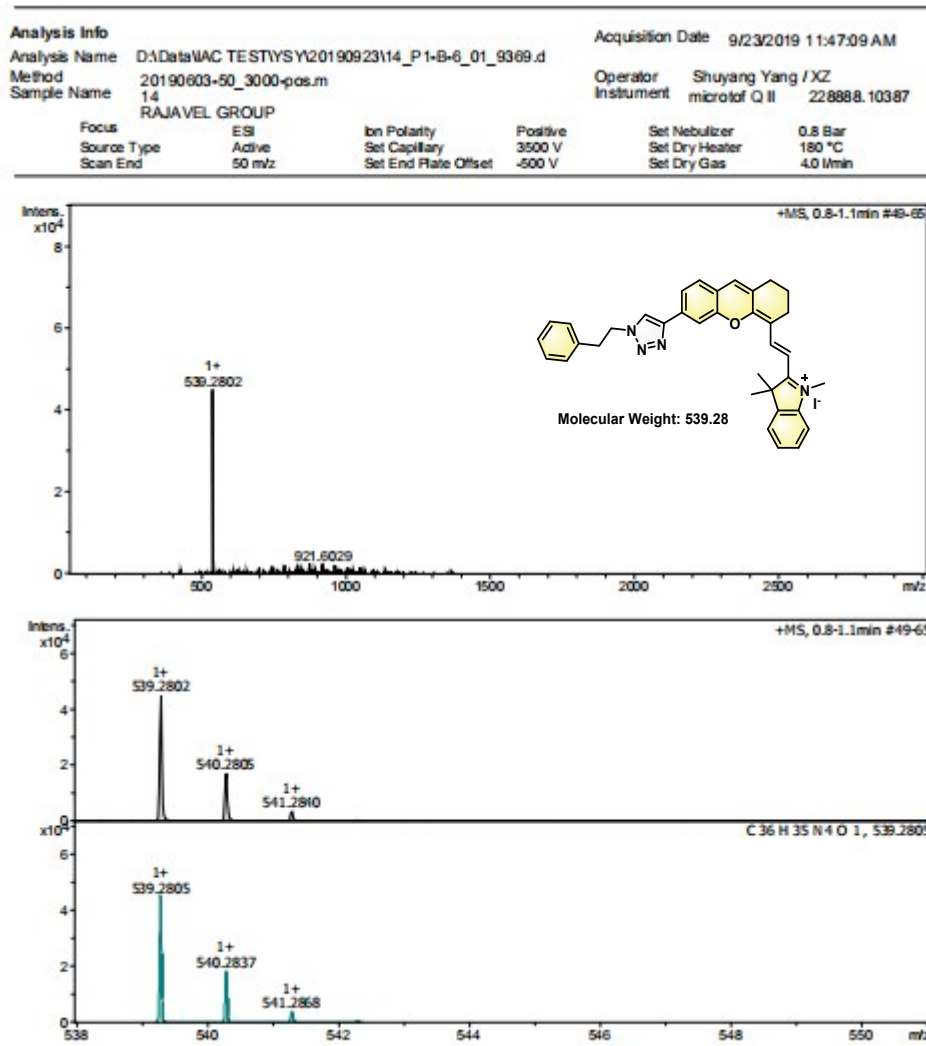



Evaluation Spectra / Validation Formula:

| Meas. m/z  | # | Ion Formula | Score  | m/z        | err [mDa] | err [ppm] | mSigma | rdb | e <sup>-</sup> Conf | N-Rule | Adduct |
|------------|---|-------------|--------|------------|-----------|-----------|--------|-----|---------------------|--------|--------|
| 539.280163 | 1 | C39H35N4O   | 100.00 | 539.280538 | -0.4      | -0.7      | 13.2   | 215 | even                | ok     | M      |

Calibration Info:

Date: 9/25/2019 4:19:47 PM  
Polarity: Positive  
Calibration spectrum: +MS, 4.6-4.7min #272-278: Scan  
Reference mass list: ESI: Tuning Mix ES-TOF (ESI) (pos)  
Calibration mode: Enhanced Quadratic

Mass List:

| Reference m/z | Resulting m/z | Intensity | Error [ppm] |
|---------------|---------------|-----------|-------------|
| 118.0863      |               |           |             |
| 322.0481      |               |           |             |
| 622.0290      | 622.0290      | 24386     | 0.008       |
| 922.0098      | 922.0097      | 60434     | -0.105      |
| 1221.9906     | 1221.9909     | 82075     | 0.225       |
| 1521.9715     | 1521.9717     | 78151     | 0.128       |
| 1821.9523     | 1821.9508     | 54660     | -0.810      |
| 2121.9332     | 2121.9349     | 33875     | 0.814       |
| 2421.9140     | 2421.9134     | 4682      | -0.260      |
| 2721.8948     |               |           |             |

Standard deviation: 0.728

| #  | m/z       | Res.  | S/N    | I %   | FWHM   |
|----|-----------|-------|--------|-------|--------|
| 1  | 430.9094  | 14346 | 72.6   | 2.0   | 0.0800 |
| 2  | 539.2802  | 15535 | 2511.5 | 100.0 | 0.0347 |
| 3  | 540.2805  | 13678 | 959.5  | 38.2  | 0.0395 |
| 4  | 541.2840  | 12768 | 195.2  | 7.8   | 0.0424 |
| 5  | 613.4210  | 13000 | 39.5   | 1.9   | 0.0472 |
| 6  | 657.4499  | 11644 | 40.5   | 2.1   | 0.0565 |
| 7  | 701.4742  | 13835 | 56.9   | 3.2   | 0.0607 |
| 8  | 745.5016  | 13837 | 69.0   | 4.1   | 0.0639 |
| 9  | 746.5047  | 13175 | 30.9   | 1.9   | 0.0667 |
| 10 | 785.5056  | 10199 | 29.1   | 1.8   | 0.0770 |
| 11 | 789.5264  | 12708 | 74.1   | 4.7   | 0.0621 |
| 12 | 790.5291  | 13876 | 35.8   | 2.3   | 0.0570 |
| 13 | 829.5292  | 12677 | 40.8   | 2.7   | 0.0654 |
| 14 | 833.5538  | 12703 | 77.0   | 5.1   | 0.0656 |
| 15 | 834.5566  | 14040 | 40.8   | 2.7   | 0.0594 |
| 16 | 849.5247  | 12763 | 32.8   | 2.2   | 0.0666 |
| 17 | 873.5529  | 12251 | 52.7   | 3.6   | 0.0713 |
| 18 | 874.5520  | 13634 | 27.3   | 1.9   | 0.0641 |
| 19 | 877.5764  | 13135 | 81.2   | 5.5   | 0.0668 |
| 20 | 878.5823  | 13257 | 38.3   | 2.6   | 0.0663 |
| 21 | 893.5523  | 12540 | 36.6   | 2.5   | 0.0713 |
| 22 | 917.5788  | 13125 | 62.1   | 4.4   | 0.0699 |
| 23 | 918.5782  | 9142  | 33.0   | 2.3   | 0.1005 |
| 24 | 921.6029  | 14602 | 79.5   | 5.6   | 0.0631 |
| 25 | 922.6067  | 14737 | 42.0   | 3.0   | 0.0626 |
| 26 | 937.5791  | 12047 | 35.2   | 2.5   | 0.0778 |
| 27 | 961.6024  | 13136 | 64.0   | 4.7   | 0.0732 |
| 28 | 962.6042  | 12302 | 30.9   | 2.2   | 0.0782 |
| 29 | 965.6301  | 13826 | 58.5   | 4.3   | 0.0698 |
| 30 | 966.6323  | 12904 | 33.4   | 2.4   | 0.0748 |
| 31 | 981.6041  | 13202 | 30.8   | 2.3   | 0.0744 |
| 32 | 1005.6293 | 13042 | 52.5   | 4.0   | 0.0771 |
| 33 | 1006.6298 | 13354 | 32.2   | 2.4   | 0.0754 |
| 34 | 1009.6557 | 12959 | 43.6   | 3.3   | 0.0779 |
| 35 | 1010.6585 | 13468 | 24.5   | 1.8   | 0.0750 |
| 36 | 1025.6317 | 12545 | 23.0   | 1.7   | 0.0818 |
| 37 | 1049.6543 | 13232 | 48.4   | 3.7   | 0.0793 |
| 38 | 1050.6559 | 13348 | 27.7   | 2.1   | 0.0787 |
| 39 | 1053.6817 | 13363 | 30.6   | 2.4   | 0.0788 |
| 40 | 1093.6769 | 12704 | 33.7   | 2.6   | 0.0861 |
| #  | m/z       | Res.  | S/N    | I %   | FWHM   |
| 1  | 539.2805  | 15535 |        | 100.0 | 0.0347 |
| 2  | 540.2837  | 15563 |        | 40.8  | 0.0347 |
| 3  | 541.2868  | 15592 |        | 8.3   | 0.0347 |
| 4  | 542.2899  | 15621 |        | 1.1   | 0.0347 |

## Triazole-based DHX-hemicyanine fused dye 2c

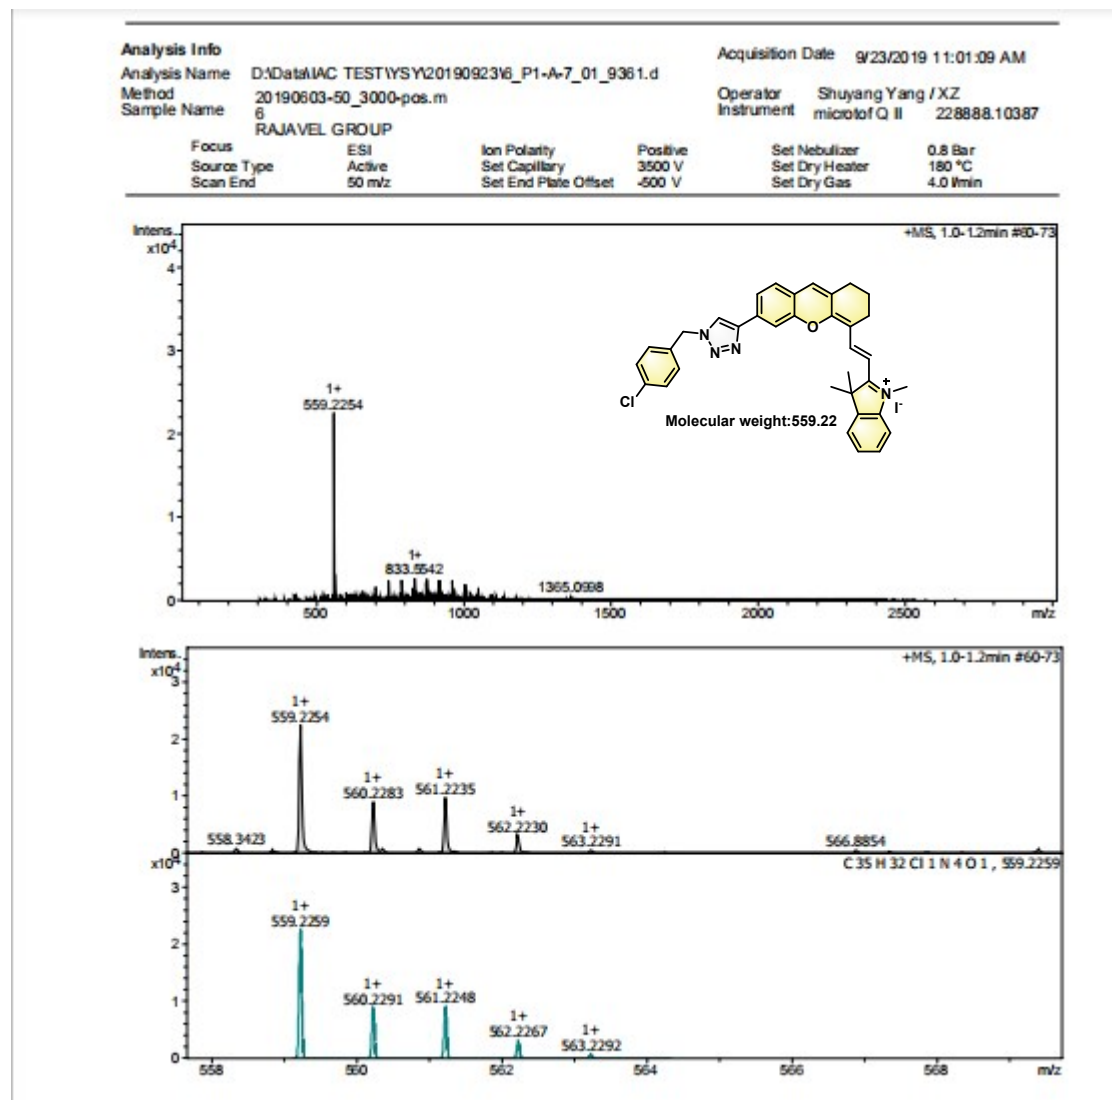

Evaluation Spectra / Validation Formula:

| Meas. m/z  | # | Ion Formula | Score | m/z        | err [mDa] | err [ppm] | mSigma | rdB  | e <sup>-</sup> Conf | N-Rule | Adduct |
|------------|---|-------------|-------|------------|-----------|-----------|--------|------|---------------------|--------|--------|
| 559.225361 | 1 | C39H32ClN4O | 99.46 | 559.225916 | -0.6      | -1.0      | 15.5   | 21.5 | even                | ok     | M      |

Calibration Info:

Date: 9/25/2019 10:20:47 AM  
Polarity: Positive  
Calibration spectrum: +MS, 4.6-4.7min #272-279: Scan  
Reference mass list: ESI: Tuning Mix ES-TOF (ESI) (pos)  
Calibration mode: Enhanced Quadratic

Mass List:

| Reference m/z | Resulting m/z | Intensity | Error [ppm] |
|---------------|---------------|-----------|-------------|
| 118.0863      |               |           |             |
| 322.0481      |               |           |             |
| 622.0290      | 622.0289      | 23619     | -0.027      |
| 922.0098      | 922.0099      | 58266     | 0.125       |
| 1221.9906     | 1221.9904     | 77212     | -0.233      |
| 1521.9715     | 1521.9719     | 77408     | 0.292       |
| 1821.9523     | 1821.9517     | 50859     | -0.325      |
| 2121.9332     | 2121.9337     | 32493     | 0.244       |
| 2421.9140     | 2421.9138     | 4307      | -0.075      |
| 2721.8948     |               |           |             |

Standard deviation: 0.344

| #  | m/z       | Res.  | S/N   | I%    | FWHM   |
|----|-----------|-------|-------|-------|--------|
| 1  | 559.2254  | 13389 | 884.4 | 100.0 | 0.0418 |
| 2  | 560.2283  | 13250 | 353.6 | 40.0  | 0.0423 |
| 3  | 561.2235  | 14229 | 380.9 | 43.3  | 0.0394 |
| 4  | 562.2230  | 13510 | 125.4 | 14.3  | 0.0416 |
| 5  | 602.3668  | 13911 | 32.4  | 4.1   | 0.0433 |
| 6  | 657.4499  | 12598 | 35.2  | 5.0   | 0.0522 |
| 7  | 701.4771  | 13583 | 49.4  | 7.6   | 0.0516 |
| 8  | 745.5031  | 15042 | 66.0  | 10.7  | 0.0486 |
| 9  | 746.5053  | 14353 | 26.9  | 4.4   | 0.0520 |
| 10 | 785.5057  | 8781  | 26.4  | 4.4   | 0.0895 |
| 11 | 789.5286  | 13042 | 66.9  | 11.3  | 0.0505 |
| 12 | 790.5304  | 14268 | 31.3  | 5.3   | 0.0554 |
| 13 | 828.5994  | 14450 | 23.7  | 4.1   | 0.0573 |
| 14 | 829.5293  | 12340 | 40.0  | 7.0   | 0.0572 |
| 15 | 831.5011  | 11632 | 24.8  | 4.3   | 0.0715 |
| 16 | 833.5542  | 13137 | 68.8  | 12.1  | 0.0635 |
| 17 | 834.5561  | 13327 | 35.2  | 6.2   | 0.0626 |
| 18 | 853.5110  | 13392 | 26.7  | 4.8   | 0.0637 |
| 19 | 873.5533  | 13457 | 53.5  | 9.7   | 0.0549 |
| 20 | 874.5516  | 12595 | 26.6  | 4.8   | 0.0594 |
| 21 | 875.5302  | 11803 | 29.7  | 5.4   | 0.0742 |
| 22 | 876.0247  | 14833 | 24.0  | 4.3   | 0.0591 |
| 23 | 877.5773  | 12780 | 65.4  | 11.8  | 0.0587 |
| 24 | 878.5846  | 13020 | 32.4  | 5.9   | 0.0575 |
| 25 | 897.5390  | 12027 | 22.7  | 4.1   | 0.0746 |
| 26 | 916.6519  | 14052 | 22.3  | 4.1   | 0.0652 |
| 27 | 917.5789  | 12782 | 58.7  | 10.8  | 0.0718 |
| 28 | 918.5825  | 11392 | 27.8  | 5.1   | 0.0806 |
| 29 | 919.5600  | 10845 | 26.3  | 4.8   | 0.0848 |
| 30 | 921.6042  | 13732 | 59.1  | 10.8  | 0.0571 |
| 31 | 922.6071  | 13464 | 28.8  | 5.3   | 0.0685 |
| 32 | 961.6030  | 13107 | 58.6  | 10.9  | 0.0734 |
| 33 | 962.6051  | 13435 | 32.1  | 6.0   | 0.0716 |
| 34 | 963.5909  | 11428 | 21.9  | 4.1   | 0.0843 |
| 35 | 965.6290  | 12582 | 37.5  | 7.0   | 0.0767 |
| 36 | 966.6319  | 14227 | 24.6  | 4.6   | 0.0579 |
| 37 | 1005.6297 | 13185 | 46.7  | 8.8   | 0.0763 |
| 38 | 1006.6293 | 12590 | 25.6  | 4.8   | 0.0800 |
| 39 | 1009.6549 | 13291 | 26.3  | 5.0   | 0.0760 |
| 40 | 1049.6527 | 13830 | 37.5  | 7.1   | 0.0759 |
| #  | m/z       | Res.  | S/N   | I%    | FWHM   |
| 1  | 559.2259  | 13389 |       | 100.0 | 0.0418 |
| 2  | 560.2291  | 13413 |       | 39.7  | 0.0418 |
| 3  | 561.2248  | 13437 |       | 39.9  | 0.0418 |
| 4  | 562.2267  | 13461 |       | 13.7  | 0.0418 |

## Triazole-based DHX-hemicyanine fused dye 2d

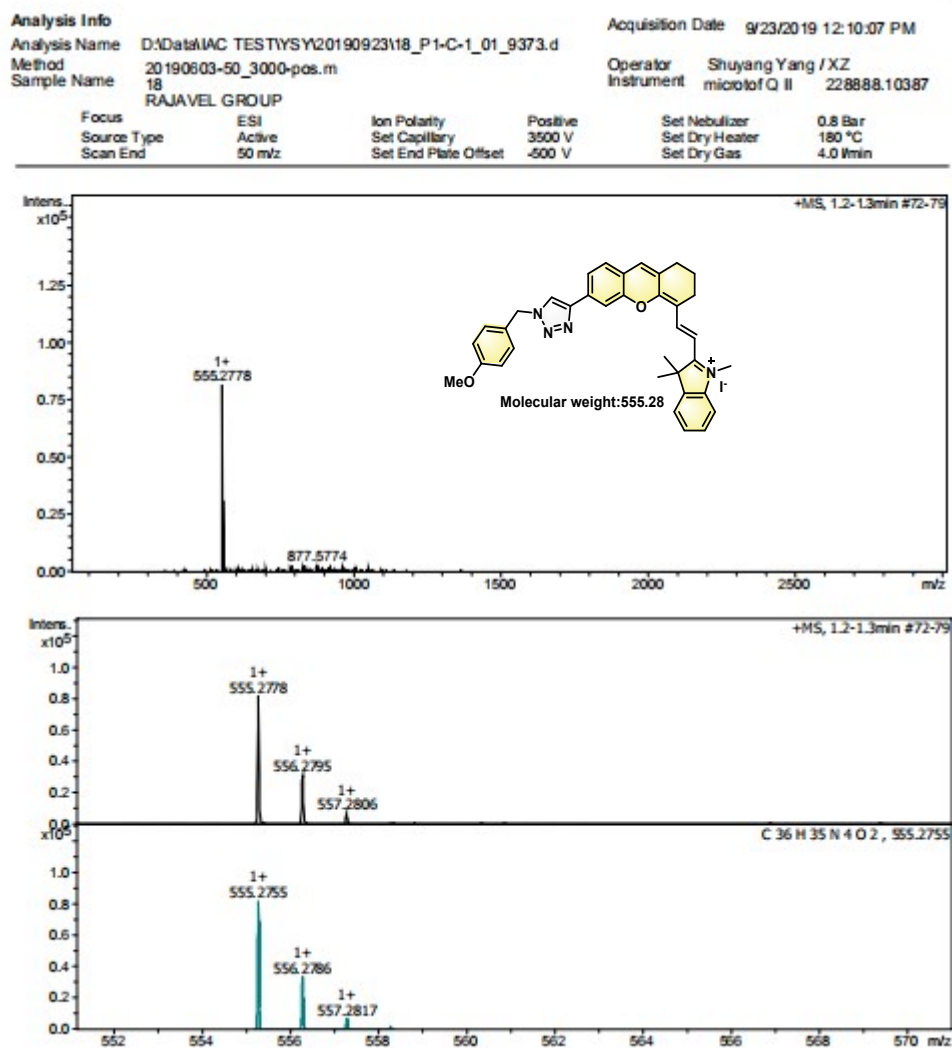

Evaluation Spectra / Validation Formula:

| Meas. m/z | # | Ion Formula | Score | m/z        | err [mDa] | err [ppm] | mSigma | rdB  | e <sup>-</sup> Conf | N-Rule | Adduct |
|-----------|---|-------------|-------|------------|-----------|-----------|--------|------|---------------------|--------|--------|
| 555.27786 | 1 | C39H35N4O2  | 44.03 | 555.275453 | 2.4       | 4.3       | 13.0   | 21.5 | even                | ok     | M      |

Calibration Info:

Date: 9/25/2019 4:42:53 PM  
 Polarity: Positive  
 Calibration spectrum: +MS, 4.6-4.6min #272-276: Scan  
 Reference mass list: ESI: Tuning Mix ES-TOF (ESI) (pos)  
 Calibration mode: Enhanced Quadratic

Mass List:

| Reference m/z | Resulting m/z | Intensity | Error [ppm] |
|---------------|---------------|-----------|-------------|
| 118.0863      |               |           |             |
| 322.0481      |               |           |             |
| 622.0290      | 622.0290      | 23437     | 0.080       |
| 922.0098      | 922.0095      | 62023     | -0.366      |
| 1221.9906     | 1221.9912     | 107098    | 0.482       |
| 1521.9715     | 1521.9716     | 103490    | 0.083       |
| 1821.9523     | 1821.9511     | 75823     | -0.665      |
| 2121.9332     | 2121.9342     | 56879     | 0.507       |
| 2421.9140     | 2421.9137     | 12791     | -0.121      |
| 2721.8948     |               |           |             |

Standard deviation: 0.629

| #  | m/z       | Res.  | S/N    | I %   | FWHM   |
|----|-----------|-------|--------|-------|--------|
| 1  | 555.2778  | 15981 | 2947.0 | 100.0 | 0.0347 |
| 2  | 556.2795  | 14165 | 1129.0 | 38.4  | 0.0393 |
| 3  | 557.2806  | 12655 | 238.0  | 8.1   | 0.0440 |
| 4  | 602.3664  | 14887 | 30.5   | 1.1   | 0.0405 |
| 5  | 609.1953  | 12716 | 37.3   | 1.4   | 0.0479 |
| 6  | 613.4207  | 11936 | 32.8   | 1.2   | 0.0514 |
| 7  | 657.4491  | 13098 | 35.8   | 1.5   | 0.0502 |
| 8  | 675.3316  | 12487 | 36.9   | 1.5   | 0.0541 |
| 9  | 701.4769  | 12365 | 41.6   | 1.8   | 0.0567 |
| 10 | 745.5023  | 15052 | 59.0   | 2.7   | 0.0495 |
| 11 | 746.5038  | 15779 | 27.1   | 1.2   | 0.0473 |
| 12 | 785.5033  | 14568 | 29.2   | 1.4   | 0.0539 |
| 13 | 789.5276  | 13671 | 66.7   | 3.2   | 0.0578 |
| 14 | 790.5312  | 14077 | 31.4   | 1.5   | 0.0562 |
| 15 | 828.5984  | 13860 | 23.6   | 1.2   | 0.0598 |
| 16 | 829.5297  | 13679 | 37.7   | 1.8   | 0.0606 |
| 17 | 831.5073  | 11191 | 23.7   | 1.2   | 0.0743 |
| 18 | 833.5541  | 12690 | 66.0   | 3.2   | 0.0657 |
| 19 | 834.5579  | 12600 | 31.7   | 1.6   | 0.0662 |
| 20 | 873.5552  | 11743 | 47.0   | 2.4   | 0.0744 |
| 21 | 874.5536  | 13200 | 26.8   | 1.4   | 0.0663 |
| 22 | 875.5333  | 15914 | 29.2   | 1.5   | 0.0550 |
| 23 | 877.5774  | 15283 | 69.5   | 3.5   | 0.0574 |
| 24 | 878.5933  | 14289 | 36.8   | 1.9   | 0.0615 |
| 25 | 893.5527  | 16965 | 22.8   | 1.2   | 0.0527 |
| 26 | 897.5371  | 13200 | 22.4   | 1.1   | 0.0680 |
| 27 | 917.5786  | 10959 | 46.8   | 2.4   | 0.0837 |
| 28 | 918.5823  | 11024 | 26.8   | 1.4   | 0.0833 |
| 29 | 919.5626  | 10849 | 23.8   | 1.2   | 0.0848 |
| 30 | 921.6048  | 13145 | 55.5   | 2.9   | 0.0701 |
| 31 | 922.6086  | 13374 | 29.9   | 1.5   | 0.0690 |
| 32 | 961.6015  | 14921 | 53.8   | 2.8   | 0.0644 |
| 33 | 962.6037  | 13328 | 27.2   | 1.4   | 0.0722 |
| 34 | 965.6299  | 13576 | 39.5   | 2.1   | 0.0711 |
| 35 | 966.6300  | 14419 | 22.8   | 1.2   | 0.0670 |
| 36 | 1005.6304 | 12805 | 43.6   | 2.3   | 0.0798 |
| 37 | 1006.6296 | 14791 | 26.7   | 1.4   | 0.0681 |
| 38 | 1009.6549 | 14616 | 29.3   | 1.6   | 0.0691 |
| 39 | 1049.6524 | 14364 | 35.6   | 1.9   | 0.0731 |
| 40 | 1093.6851 | 12643 | 21.5   | 1.2   | 0.0865 |

| # | m/z      | Res.  | S/N | I %   | FWHM   |
|---|----------|-------|-----|-------|--------|
| 1 | 555.2755 | 15981 |     | 100.0 | 0.0347 |
| 2 | 556.2786 | 16010 |     | 40.8  | 0.0347 |
| 3 | 557.2817 | 16039 |     | 8.5   | 0.0347 |
| 4 | 558.2846 | 16068 |     | 1.2   | 0.0347 |

## Triazole-based DHX-hemicyanine fused dye 2e

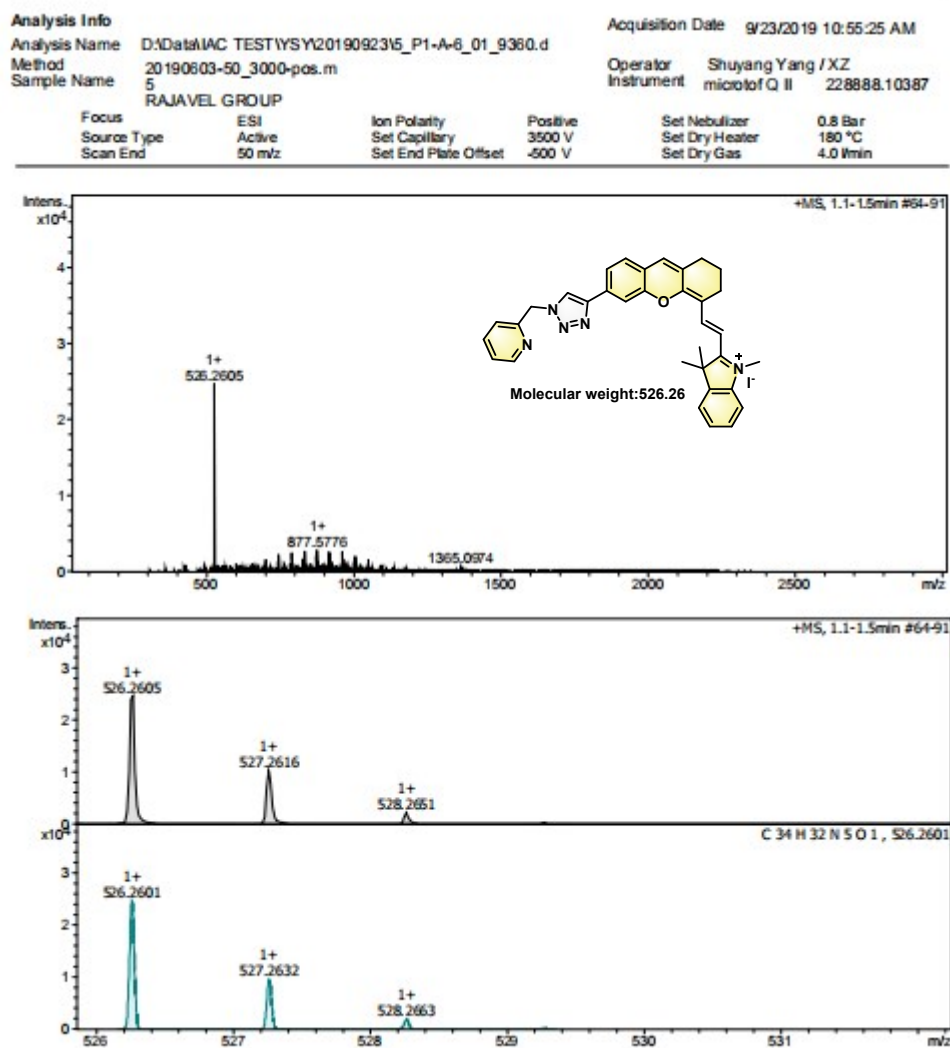



Evaluation Spectra / Validation Formula:

| Meas. m/z  | # | Ion Formula | Score  | m/z        | err [mDa] | err [ppm] | mSigma | rdb | e <sup>-</sup> Conf | N-Rule | Adduct |
|------------|---|-------------|--------|------------|-----------|-----------|--------|-----|---------------------|--------|--------|
| 526.260471 | 1 | C34H32N5O   | 100.00 | 526.260137 | -0.3      | -0.6      | 14.4   | 215 | even                | ok     | M      |

Calibration Info:

Date: 9/25/2019 10:24:08 AM  
Polarity: Positive  
Calibration spectrum: +MS, 4.6-4.7min #273-277: Scan  
Reference mass list: ESI: Tuning Mix ES-TOF (ESI) (pos)  
Calibration mode: Enhanced Quadratic

Mass List:

| Reference m/z | Resulting m/z | Intensity | Error [ppm] | #  | m/z       | Res.  | S/N    | I %   | FWHM   |
|---------------|---------------|-----------|-------------|----|-----------|-------|--------|-------|--------|
| 118.0863      |               |           |             | 1  | 526.2605  | 13516 | 1375.4 | 100.0 | 0.0389 |
| 322.0481      |               |           |             | 2  | 527.2616  | 12426 | 572.2  | 41.7  | 0.0424 |
| 622.0290      | 622.0290      | 30844     | -0.011      | 3  | 528.2651  | 13188 | 118.7  | 8.7   | 0.0401 |
| 922.0098      | 922.0098      | 75322     | 0.022       | 4  | 538.3436  | 14460 | 50.8   | 3.8   | 0.0372 |
| 1221.9906     | 1221.9906     | 106342    | -0.021      | 5  | 602.3669  | 15805 | 47.8   | 4.3   | 0.0386 |
| 1521.9715     | 1521.9717     | 98841     | 0.176       | 6  | 613.4211  | 12383 | 42.3   | 3.9   | 0.0495 |
| 1821.9523     | 1821.9515     | 65053     | -0.461      | 7  | 657.4496  | 12425 | 45.7   | 4.7   | 0.0529 |
| 2121.9332     | 2121.9341     | 44150     | 0.433       | 8  | 701.4757  | 13175 | 60.0   | 6.5   | 0.0532 |
| 2421.9140     | 2421.9137     | 6136      | -0.139      | 9  | 745.5017  | 14167 | 81.2   | 9.3   | 0.0526 |
| 2721.8948     |               |           |             | 10 | 746.5037  | 14164 | 35.6   | 4.1   | 0.0527 |
|               |               |           |             | 11 | 785.5042  | 12318 | 35.3   | 4.2   | 0.0638 |
|               |               |           |             | 12 | 789.5272  | 13278 | 86.2   | 10.4  | 0.0595 |
|               |               |           |             | 13 | 790.5297  | 13638 | 40.9   | 4.9   | 0.0580 |
|               |               |           |             | 14 | 829.5271  | 12787 | 55.0   | 6.9   | 0.0649 |
|               |               |           |             | 15 | 831.5036  | 11076 | 32.0   | 4.0   | 0.0751 |
|               |               |           |             | 16 | 833.5646  | 12699 | 88.4   | 11.1  | 0.0656 |
|               |               |           |             | 17 | 834.5667  | 13845 | 47.0   | 5.9   | 0.0603 |
|               |               |           |             | 18 | 853.5108  | 14641 | 35.5   | 4.5   | 0.0583 |
|               |               |           |             | 19 | 872.6231  | 15083 | 31.8   | 4.1   | 0.0579 |
|               |               |           |             | 20 | 873.5521  | 12513 | 66.7   | 8.5   | 0.0698 |
|               |               |           |             | 21 | 874.5526  | 12622 | 36.7   | 4.7   | 0.0693 |
|               |               |           |             | 22 | 875.5324  | 12442 | 40.5   | 5.2   | 0.0704 |
|               |               |           |             | 23 | 876.0245  | 14032 | 29.4   | 3.8   | 0.0624 |
|               |               |           |             | 24 | 877.5776  | 13169 | 91.0   | 11.7  | 0.0666 |
|               |               |           |             | 25 | 878.5823  | 13430 | 43.5   | 5.6   | 0.0654 |
|               |               |           |             | 26 | 897.5349  | 13003 | 32.9   | 4.3   | 0.0690 |
|               |               |           |             | 27 | 917.5769  | 13013 | 80.1   | 10.5  | 0.0705 |
|               |               |           |             | 28 | 918.5797  | 12166 | 38.1   | 5.0   | 0.0755 |
|               |               |           |             | 29 | 919.5589  | 10204 | 33.1   | 4.4   | 0.0901 |
|               |               |           |             | 30 | 921.6030  | 13341 | 74.3   | 9.8   | 0.0691 |
|               |               |           |             | 31 | 922.6063  | 14616 | 41.4   | 5.5   | 0.0631 |
|               |               |           |             | 32 | 961.6015  | 13695 | 78.6   | 10.6  | 0.0702 |
|               |               |           |             | 33 | 962.6029  | 12205 | 37.5   | 5.1   | 0.0789 |
|               |               |           |             | 34 | 963.5888  | 13155 | 32.1   | 4.3   | 0.0732 |
|               |               |           |             | 35 | 965.6277  | 13024 | 50.7   | 6.9   | 0.0741 |
|               |               |           |             | 36 | 966.6312  | 13409 | 30.4   | 4.1   | 0.0721 |
|               |               |           |             | 37 | 1005.6288 | 13809 | 62.1   | 8.6   | 0.0739 |
|               |               |           |             | 38 | 1006.6292 | 13575 | 34.8   | 4.8   | 0.0742 |
|               |               |           |             | 39 | 1009.6537 | 13534 | 34.4   | 4.7   | 0.0746 |
|               |               |           |             | 40 | 1049.6530 | 12612 | 47.1   | 6.6   | 0.0832 |
|               |               |           |             | #  | m/z       | Res.  | S/N    | I %   | FWHM   |
|               |               |           |             | 1  | 526.2601  | 13516 |        | 100.0 | 0.0389 |
|               |               |           |             | 2  | 527.2632  | 13542 |        | 39.0  | 0.0389 |
|               |               |           |             | 3  | 528.2663  | 13567 |        | 7.6   | 0.0389 |
|               |               |           |             | 4  | 529.2693  | 13593 |        | 1.0   | 0.0389 |

## Triazole-based DHX-hemicyanine fused dye 2f

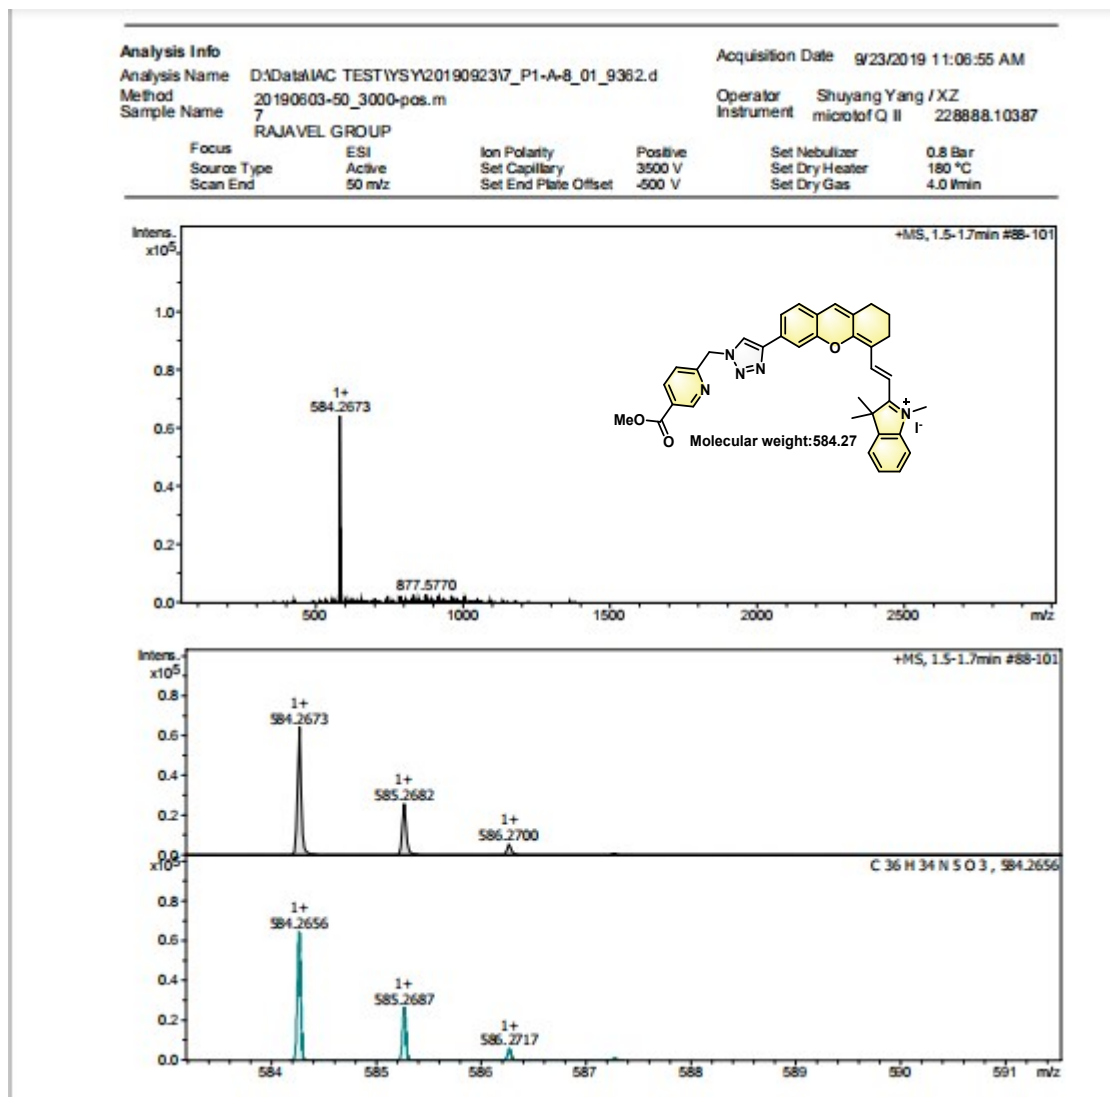



Evaluation Spectra / Validation Formula:

| Meas. m/z | # | Ion Formula | Score | m/z        | err [mDa] | err [ppm] | mSigma | rdB  | e <sup>-</sup> Conf | N-Rule | Adduct |
|-----------|---|-------------|-------|------------|-----------|-----------|--------|------|---------------------|--------|--------|
| 584.26735 | 1 | C39H34NSO3  | 51.68 | 584.265616 | 1.7       | 2.9       | 5.5    | 22.5 | even                | ok     | M      |

Calibration Info:

Date: 9/25/2019 10:35:49 AM  
Polarity: Positive  
Calibration spectrum: +MS, 4.6-4.7min #273-277: Scan  
Reference mass list: ESI: Tuning Mix ES-TOF (ESI) (pos)  
Calibration mode: Enhanced Quadratic

Mass List:

| Reference m/z             | Resulting m/z | Intensity | Error [ppm] | #  | m/z       | Res.  | S/N    | I %   | FWHM   |
|---------------------------|---------------|-----------|-------------|----|-----------|-------|--------|-------|--------|
| 118.0863                  |               |           |             | 1  | 584.2673  | 16090 | 2779.7 | 100.0 | 0.0363 |
| 322.0481                  |               |           |             | 2  | 585.2682  | 14073 | 1115.3 | 40.2  | 0.0416 |
| 622.0290                  | 622.0289      | 29697     | -0.113      | 3  | 586.2700  | 13468 | 236.8  | 8.5   | 0.0435 |
| 922.0098                  | 922.0102      | 73417     | 0.410       | 4  | 602.3654  | 16850 | 43.5   | 1.6   | 0.0557 |
| 1221.9906                 | 1221.9901     | 99026     | -0.410      | 5  | 613.4202  | 14678 | 42.5   | 1.6   | 0.0418 |
| 1521.9715                 | 1521.9717     | 97595     | 0.121       | 6  | 657.4487  | 12543 | 45.0   | 1.9   | 0.0524 |
| 1821.9523                 | 1821.9517     | 65759     | -0.334      | 7  | 701.4763  | 13238 | 56.9   | 2.5   | 0.0530 |
| 2121.9332                 | 2121.9344     | 43926     | 0.570       | 8  | 745.5030  | 14039 | 77.5   | 3.7   | 0.0531 |
| 2421.9140                 | 2421.9134     | 6844      | -0.244      | 9  | 746.5045  | 14044 | 32.1   | 1.5   | 0.0532 |
| 2721.8948                 |               |           |             | 10 | 785.5029  | 11104 | 32.9   | 1.6   | 0.0707 |
| Standard deviation: 0.558 |               |           |             | 11 | 789.5264  | 13422 | 79.8   | 4.0   | 0.0588 |
|                           |               |           |             | 12 | 790.5298  | 13258 | 39.4   | 2.0   | 0.0596 |
|                           |               |           |             | 13 | 828.5966  | 15477 | 28.4   | 1.5   | 0.0535 |
|                           |               |           |             | 14 | 829.5266  | 13409 | 50.0   | 2.6   | 0.0619 |
|                           |               |           |             | 15 | 831.5016  | 12872 | 32.7   | 1.7   | 0.0646 |
|                           |               |           |             | 16 | 833.5536  | 13343 | 83.9   | 4.4   | 0.0625 |
|                           |               |           |             | 17 | 834.5552  | 13959 | 44.3   | 2.3   | 0.0598 |
|                           |               |           |             | 18 | 853.5094  | 14762 | 33.2   | 1.7   | 0.0578 |
|                           |               |           |             | 19 | 872.6218  | 14373 | 28.5   | 1.5   | 0.0607 |
|                           |               |           |             | 20 | 873.5520  | 13853 | 68.5   | 3.7   | 0.0631 |
|                           |               |           |             | 21 | 874.5529  | 11793 | 29.7   | 1.6   | 0.0742 |
|                           |               |           |             | 22 | 875.5308  | 10796 | 31.2   | 1.7   | 0.0811 |
|                           |               |           |             | 23 | 876.0254  | 16144 | 28.1   | 1.5   | 0.0543 |
|                           |               |           |             | 24 | 877.5770  | 13422 | 85.5   | 4.6   | 0.0654 |
|                           |               |           |             | 25 | 878.5840  | 13036 | 41.2   | 2.2   | 0.0674 |
|                           |               |           |             | 26 | 897.5375  | 13216 | 28.6   | 1.6   | 0.0679 |
|                           |               |           |             | 27 | 917.5783  | 12396 | 69.7   | 3.8   | 0.0740 |
|                           |               |           |             | 28 | 918.5801  | 11327 | 32.5   | 1.8   | 0.0811 |
|                           |               |           |             | 29 | 919.5591  | 11439 | 31.8   | 1.7   | 0.0804 |
|                           |               |           |             | 30 | 921.6030  | 13620 | 69.0   | 3.8   | 0.0677 |
|                           |               |           |             | 31 | 922.6050  | 14212 | 38.0   | 2.1   | 0.0649 |
|                           |               |           |             | 32 | 961.6010  | 14421 | 71.8   | 4.0   | 0.0667 |
|                           |               |           |             | 33 | 962.6024  | 13113 | 33.9   | 1.9   | 0.0734 |
|                           |               |           |             | 34 | 963.5891  | 12747 | 26.1   | 1.5   | 0.0756 |
|                           |               |           |             | 35 | 965.6278  | 13231 | 48.7   | 2.7   | 0.0730 |
|                           |               |           |             | 36 | 966.6297  | 14519 | 26.4   | 1.5   | 0.0666 |
|                           |               |           |             | 37 | 1005.6280 | 13858 | 55.4   | 3.2   | 0.0726 |
|                           |               |           |             | 38 | 1006.6302 | 12054 | 26.9   | 1.5   | 0.0834 |
|                           |               |           |             | 39 | 1009.6548 | 12849 | 30.3   | 1.7   | 0.0786 |
|                           |               |           |             | 40 | 1049.6523 | 15476 | 44.6   | 2.6   | 0.0678 |
|                           |               |           |             | #  | m/z       | Res.  | S/N    | I %   | FWHM   |
|                           |               |           |             | 1  | 584.2656  | 16090 |        | 100.0 | 0.0363 |
|                           |               |           |             | 2  | 585.2687  | 16118 |        | 41.3  | 0.0363 |
|                           |               |           |             | 3  | 586.2717  | 16146 |        | 8.9   | 0.0363 |
|                           |               |           |             | 4  | 587.2746  | 16173 |        | 1.3   | 0.0363 |

## Triazole-based DHX-hemicyanine fused dye 2g

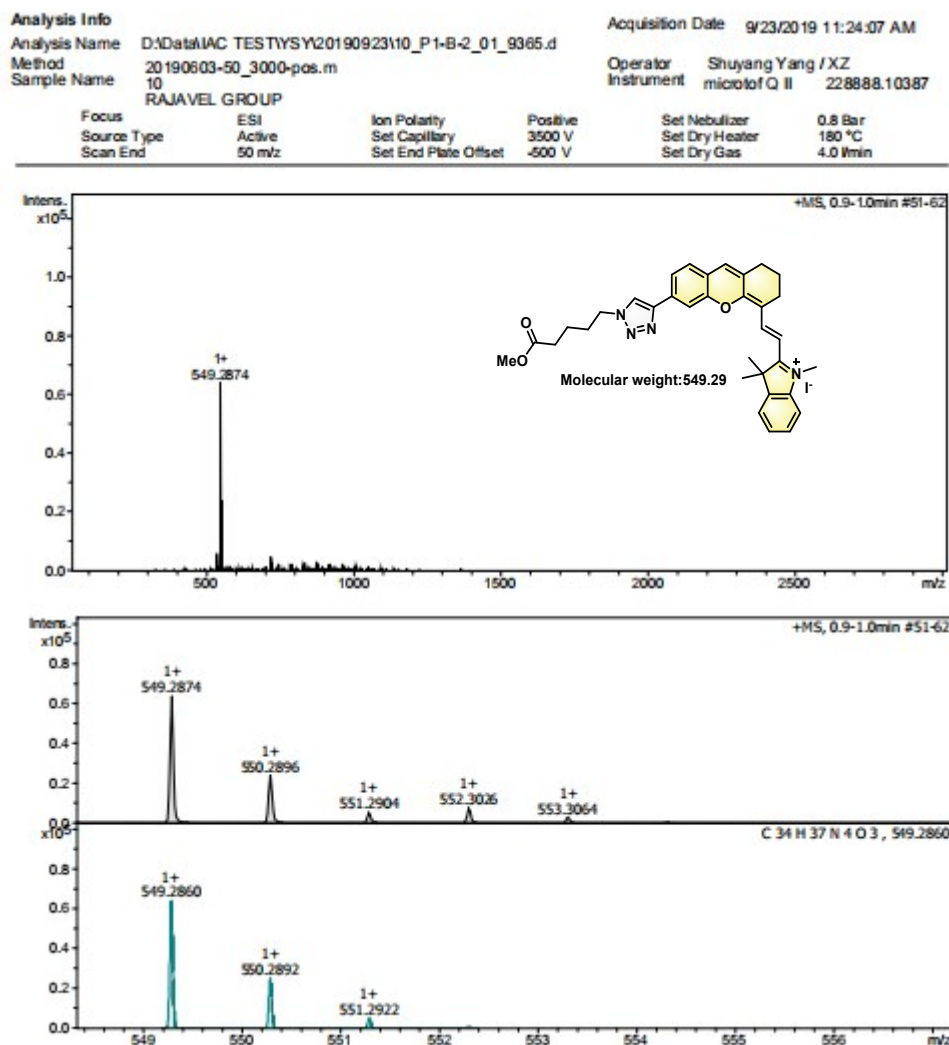

## Evaluation Spectra / Validation Formula:

| Meas. m/z  | # | Ion Formula | Score | m/z        | err [mDa] | err [ppm] | mSigma | rdb  | e <sup>-</sup> Conf | N-Rule | Adduct |
|------------|---|-------------|-------|------------|-----------|-----------|--------|------|---------------------|--------|--------|
| 549.287409 | 1 | C34H37N4O3  | 49.54 | 549.286017 | 1.4       | 2.5       | 55.2   | 18.5 | even                | ok     | M      |

## Calibration Info:

Date: 9/25/2019 11:00:11 AM  
Polarity: Positive  
Calibration spectrum: +MS, 4.6-4.7min #273-277: Scan  
Reference mass list: ESI: Tuning Mix ES-TOF (ESI) (pos)  
Calibration mode: Enhanced Quadratic

## Mass List:

| Reference m/z | Resulting m/z | Intensity | Error [ppm] | #  | m/z       | Res.  | S/N    | I %   | FWHM   |
|---------------|---------------|-----------|-------------|----|-----------|-------|--------|-------|--------|
| 118.0863      |               |           |             | 1  | 535.2681  | 13353 | 223.8  | 9.2   | 0.0401 |
| 322.0481      |               |           |             | 2  | 536.2764  | 10962 | 81.5   | 3.4   | 0.0489 |
| 622.0290      | 622.0289      | 28355     | -0.061      | 3  | 549.2874  | 15853 | 2352.1 | 100.0 | 0.0346 |
| 922.0098      | 922.0099      | 71603     | 0.150       | 4  | 550.2896  | 13658 | 883.7  | 37.7  | 0.0403 |
| 1221.9906     | 1221.9906     | 97729     | -0.012      | 5  | 551.2904  | 13622 | 199.6  | 8.5   | 0.0405 |
| 1521.9715     | 1521.9716     | 87493     | 0.085       | 6  | 552.3026  | 14123 | 283.4  | 12.1  | 0.0391 |
| 1821.9523     | 1821.9509     | 62855     | -0.785      | 7  | 553.3064  | 13073 | 101.6  | 4.3   | 0.0423 |
| 2121.9332     | 2121.9352     | 42031     | 0.980       | 8  | 613.4187  | 12506 | 29.5   | 1.4   | 0.0490 |
| 2421.9140     | 2421.9131     | 5726      | -0.357      | 9  | 657.4495  | 11414 | 31.7   | 1.7   | 0.0576 |
| 2721.8948     |               |           |             | 10 | 701.4763  | 12138 | 41.4   | 2.3   | 0.0578 |
|               |               |           |             | 11 | 720.3871  | 14076 | 132.8  | 7.6   | 0.0512 |
|               |               |           |             | 12 | 721.3928  | 11849 | 79.3   | 4.6   | 0.0609 |
|               |               |           |             | 13 | 722.3975  | 11273 | 28.9   | 1.7   | 0.0641 |
|               |               |           |             | 14 | 723.4056  | 11920 | 38.2   | 2.2   | 0.0607 |
|               |               |           |             | 15 | 745.5018  | 15524 | 61.6   | 3.6   | 0.0480 |
|               |               |           |             | 16 | 746.5061  | 14283 | 26.0   | 1.5   | 0.0523 |
|               |               |           |             | 17 | 785.5051  | 12154 | 25.2   | 1.5   | 0.0646 |
|               |               |           |             | 18 | 789.5267  | 13529 | 63.7   | 3.9   | 0.0584 |
|               |               |           |             | 19 | 790.5284  | 14096 | 29.9   | 1.8   | 0.0561 |
|               |               |           |             | 20 | 828.5985  | 15658 | 23.0   | 1.5   | 0.0529 |
|               |               |           |             | 21 | 829.5289  | 12579 | 34.1   | 2.1   | 0.0659 |
|               |               |           |             | 22 | 833.5537  | 12804 | 64.3   | 4.1   | 0.0651 |
|               |               |           |             | 23 | 834.5566  | 12951 | 32.7   | 2.1   | 0.0644 |
|               |               |           |             | 24 | 872.6214  | 13942 | 23.5   | 1.5   | 0.0626 |
|               |               |           |             | 25 | 873.5555  | 8381  | 41.6   | 2.7   | 0.1042 |
|               |               |           |             | 26 | 875.5324  | 11108 | 23.7   | 1.5   | 0.0788 |
|               |               |           |             | 27 | 877.5776  | 13349 | 64.8   | 4.2   | 0.0657 |
|               |               |           |             | 28 | 878.5823  | 13570 | 31.2   | 2.0   | 0.0647 |
|               |               |           |             | 29 | 917.5797  | 13419 | 51.5   | 3.4   | 0.0684 |
|               |               |           |             | 30 | 918.5789  | 12918 | 27.6   | 1.8   | 0.0711 |
|               |               |           |             | 31 | 921.6031  | 13874 | 54.8   | 3.6   | 0.0664 |
|               |               |           |             | 32 | 922.6070  | 17009 | 33.8   | 2.2   | 0.0542 |
|               |               |           |             | 33 | 961.6024  | 12751 | 49.8   | 3.3   | 0.0754 |
|               |               |           |             | 34 | 962.6034  | 11005 | 22.5   | 1.5   | 0.0875 |
|               |               |           |             | 35 | 965.6310  | 13184 | 39.3   | 2.6   | 0.0732 |
|               |               |           |             | 36 | 1005.6297 | 13654 | 43.3   | 2.9   | 0.0736 |
|               |               |           |             | 37 | 1006.6290 | 13481 | 24.8   | 1.7   | 0.0747 |
|               |               |           |             | 38 | 1009.6539 | 13836 | 28.4   | 1.9   | 0.0730 |
|               |               |           |             | 39 | 1049.6549 | 12419 | 33.1   | 2.2   | 0.0845 |
|               |               |           |             | 40 | 1093.6779 | 11070 | 20.5   | 1.4   | 0.0988 |
|               |               |           |             | #  | m/z       | Res.  | S/N    | I %   | FWHM   |
|               |               |           |             | 1  | 549.2860  | 15853 |        | 100.0 | 0.0346 |
|               |               |           |             | 2  | 550.2862  | 15882 |        | 38.8  | 0.0346 |
|               |               |           |             | 3  | 551.2922  | 15911 |        | 7.9   | 0.0346 |
|               |               |           |             | 4  | 552.2955  | 15940 |        | 1.1   | 0.0346 |

Bruker Daltonics ESI - microTOF Q II

MS Lab | IAC - SPST - TJU

Page 2 of 2

### Triazole-based DHX-hemicyanine fused dye 2h

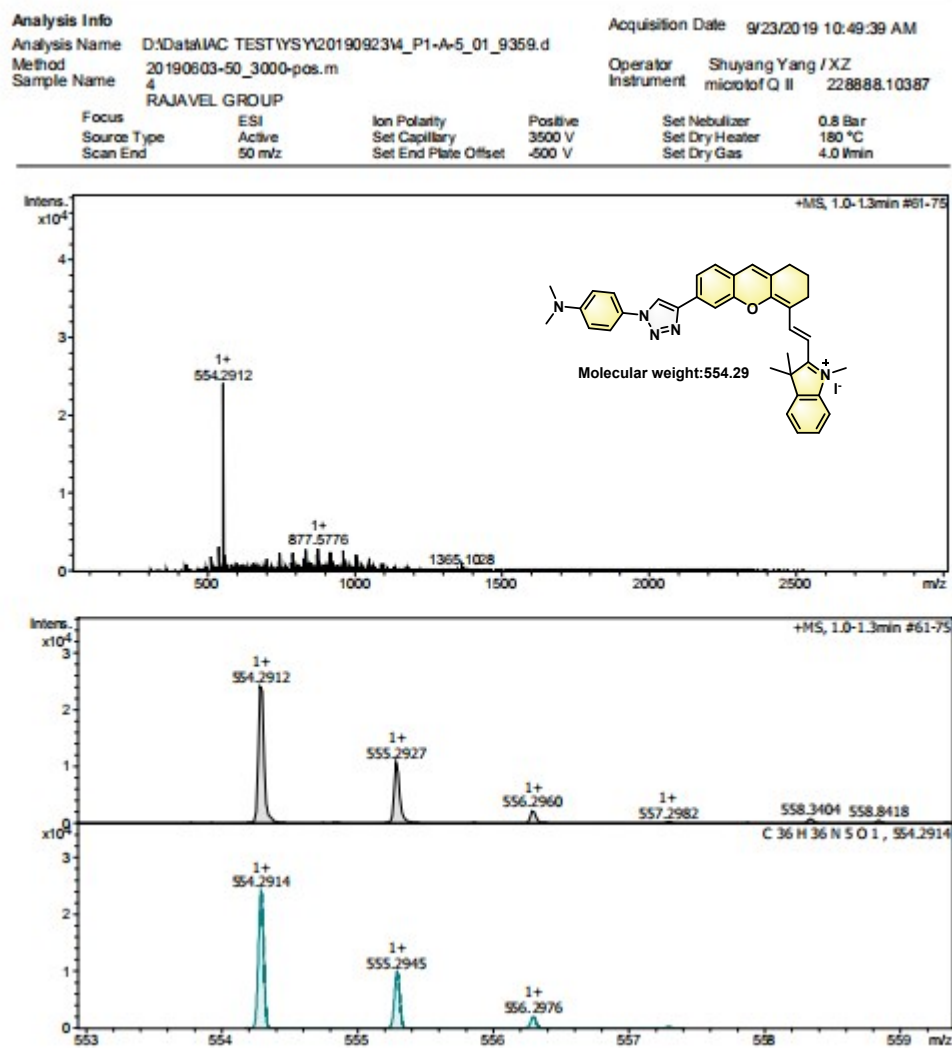

## Evaluation Spectra / Validation Formula:

| Meas. m/z  | # | Ion Formula | Score  | m/z        | err [mDa] | err [ppm] | mSigma | rdb  | e <sup>-</sup> Conf | N-Rule | Adduct |
|------------|---|-------------|--------|------------|-----------|-----------|--------|------|---------------------|--------|--------|
| 554.291232 | 1 | C38H36N5O   | 100.00 | 554.291437 | 0.2       | 0.4       | 18.3   | 21.5 | even                | ok     | M      |

## Calibration Info:

Date: 9/24/2019 4:58:39 PM  
Polarity: Positive  
Calibration spectrum: +MS, 4.5-4.7min #272-280: Scan  
Reference mass list: ESI: Tuning Mix ES-TOF (ESI) (pos)  
Calibration mode: Enhanced Quadratic

| Reference m/z | Resulting m/z | Intensity | Error [ppm] |
|---------------|---------------|-----------|-------------|
| 118.0863      |               |           |             |
| 322.0481      |               |           |             |
| 622.0290      | 622.0289      | 21308     | -0.091      |
| 922.0098      | 922.0101      | 52188     | 0.328       |
| 1221.9906     | 1221.9902     | 71478     | -0.320      |
| 1521.9715     | 1521.9716     | 70121     | 0.102       |
| 1821.9523     | 1821.9517     | 46504     | -0.316      |
| 2121.9332     | 2121.9342     | 31318     | 0.511       |
| 2421.9140     | 2421.9135     | 3991      | -0.214      |
| 2721.8948     |               |           |             |

Standard deviation: 0.480

## Mass List:

| #  | m/z       | Res.  | S/N   | I %   | FWHM   |
|----|-----------|-------|-------|-------|--------|
| 1  | 430.9107  | 13652 | 58.1  | 4.0   | 0.0315 |
| 2  | 511.2599  | 13018 | 88.9  | 7.9   | 0.0393 |
| 3  | 539.2673  | 12180 | 74.3  | 7.2   | 0.0443 |
| 4  | 540.2717  | 13546 | 135.3 | 13.2  | 0.0399 |
| 5  | 541.2775  | 12459 | 46.6  | 4.5   | 0.0434 |
| 6  | 554.2912  | 12873 | 993.4 | 100.0 | 0.0431 |
| 7  | 555.2927  | 13733 | 444.2 | 44.8  | 0.0404 |
| 8  | 556.2960  | 12460 | 90.4  | 9.1   | 0.0446 |
| 9  | 602.3652  | 14825 | 36.5  | 4.2   | 0.0406 |
| 10 | 657.4494  | 11586 | 35.2  | 4.5   | 0.0567 |
| 11 | 701.4755  | 12458 | 48.6  | 6.7   | 0.0563 |
| 12 | 745.5030  | 14245 | 66.8  | 9.7   | 0.0523 |
| 13 | 746.5043  | 13386 | 28.5  | 4.1   | 0.0558 |
| 14 | 785.5046  | 10215 | 30.1  | 4.5   | 0.0769 |
| 15 | 789.5292  | 12868 | 66.5  | 10.0  | 0.0514 |
| 16 | 790.5309  | 13322 | 33.4  | 5.1   | 0.0593 |
| 17 | 829.5295  | 12249 | 46.5  | 7.3   | 0.0577 |
| 18 | 831.5050  | 13324 | 30.0  | 4.7   | 0.0524 |
| 19 | 833.5554  | 13450 | 74.0  | 11.6  | 0.0520 |
| 20 | 834.5568  | 12283 | 33.3  | 5.2   | 0.0579 |
| 21 | 853.5109  | 12920 | 28.5  | 4.5   | 0.0661 |
| 22 | 873.5536  | 12958 | 54.9  | 8.8   | 0.0574 |
| 23 | 874.5542  | 12352 | 27.8  | 4.5   | 0.0708 |
| 24 | 875.5327  | 11431 | 31.9  | 5.1   | 0.0766 |
| 25 | 877.5776  | 14161 | 75.8  | 12.2  | 0.0520 |
| 26 | 878.5836  | 13524 | 36.4  | 5.9   | 0.0650 |
| 27 | 917.5795  | 12918 | 64.7  | 10.5  | 0.0710 |
| 28 | 918.5812  | 11140 | 30.0  | 4.9   | 0.0825 |
| 29 | 919.5813  | 11132 | 27.0  | 4.4   | 0.0826 |
| 30 | 921.6049  | 12548 | 58.1  | 9.5   | 0.0734 |
| 31 | 922.6060  | 15154 | 34.7  | 5.6   | 0.0509 |
| 32 | 961.6029  | 13916 | 68.0  | 11.3  | 0.0591 |
| 33 | 962.6039  | 13382 | 32.9  | 5.4   | 0.0719 |
| 34 | 963.5912  | 12244 | 23.9  | 4.0   | 0.0787 |
| 35 | 965.6304  | 13052 | 41.1  | 6.8   | 0.0739 |
| 36 | 1005.6318 | 13674 | 51.9  | 8.8   | 0.0735 |
| 37 | 1006.6290 | 13683 | 29.5  | 5.0   | 0.0736 |
| 38 | 1009.6545 | 13280 | 28.2  | 4.8   | 0.0760 |
| 39 | 1049.6553 | 14219 | 41.0  | 7.0   | 0.0738 |
| 40 | 1093.6798 | 11710 | 24.5  | 4.2   | 0.0934 |

  

| # | m/z      | Res.  | S/N | I %   | FWHM   |
|---|----------|-------|-----|-------|--------|
| 1 | 554.2914 | 12873 |     | 100.0 | 0.0431 |
| 2 | 555.2945 | 12896 |     | 41.2  | 0.0431 |
| 3 | 556.2976 | 12920 |     | 8.5   | 0.0431 |
| 4 | 557.3007 | 12943 |     | 1.2   | 0.0431 |

## Triazole-based DHX-hemicyanine fused dye 2i

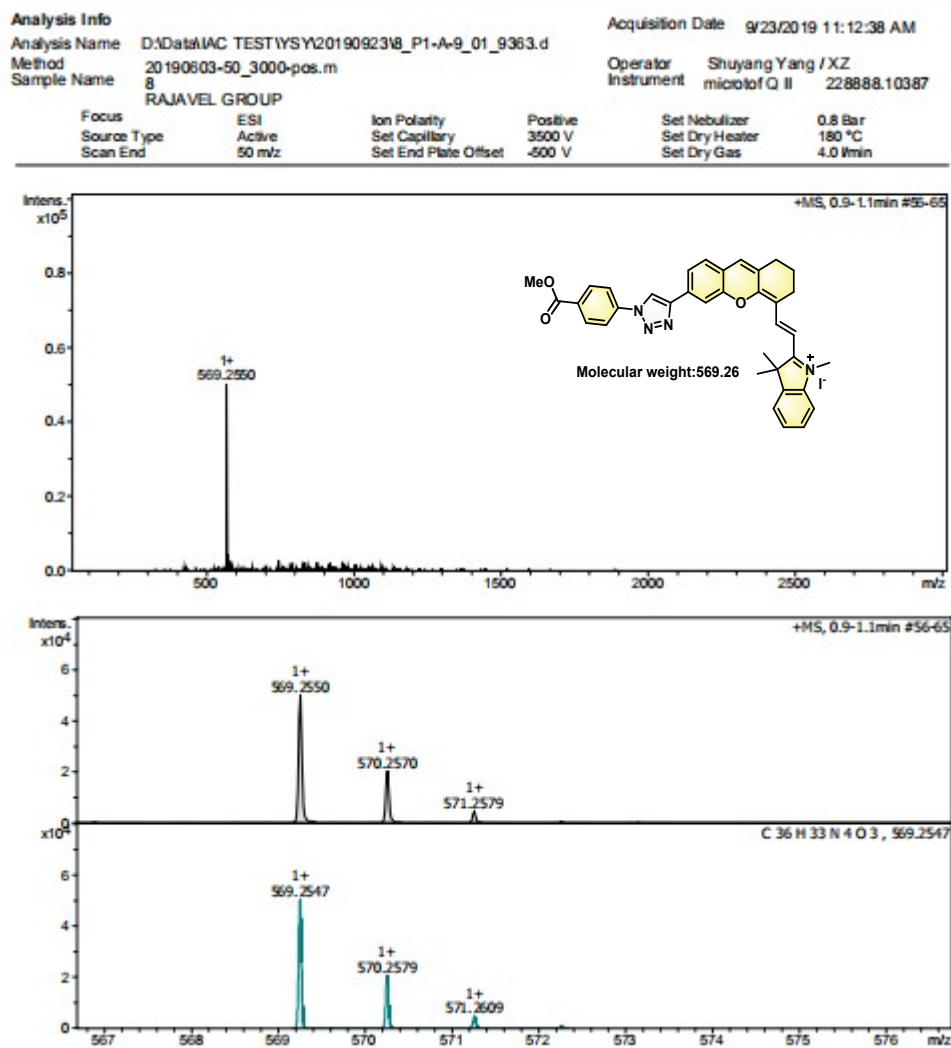



Evaluation Spectra / Validation Formula:

| Meas. m/z  | # | Ion Formula | Score  | m/z        | err [mDa] | err [ppm] | mSigma | rdB  | e <sup>-</sup> Conf | N-Rule | Adduct |
|------------|---|-------------|--------|------------|-----------|-----------|--------|------|---------------------|--------|--------|
| 569.255034 | 1 | C39H33N4O3  | 100.00 | 569.254717 | 0.3       | 0.6       | 1.5    | 22.5 | even                | ok     | M      |

Calibration Info:

Date: 9/25/2019 10:57:59 AM  
Polarity: Positive  
Calibration spectrum: +MS, 4.6-4.7min #273-277: Scan  
Reference mass list: ESI: Tuning Mix ES-TOF (ESI) (pos)  
Calibration mode: Enhanced Quadratic

Mass List:

| Reference m/z | Resulting m/z | Intensity | Error [ppm] |
|---------------|---------------|-----------|-------------|
| 118.0863      |               |           |             |
| 322.0481      |               |           |             |
| 622.0290      | 622.0290      | 29247     | -0.001      |
| 922.0098      | 922.0098      | 74970     | -0.003      |
| 1221.9906     | 1221.9906     | 99646     | -0.042      |
| 1521.9715     | 1521.9719     | 91966     | 0.263       |
| 1821.9523     | 1821.9514     | 64734     | -0.497      |
| 2121.9332     | 2121.9340     | 42327     | 0.394       |
| 2421.9140     | 2421.9137     | 5962      | -0.113      |
| 2721.8948     |               |           |             |

Standard deviation: 0.420

| #  | m/z       | Res.  | S/N    | I %   | FWHM   |
|----|-----------|-------|--------|-------|--------|
| 1  | 430.9069  | 18579 | 48.0   | 1.8   | 0.0232 |
| 2  | 541.3447  | 11688 | 45.9   | 2.2   | 0.0463 |
| 3  | 569.2550  | 15205 | 1912.3 | 100.0 | 0.0374 |
| 4  | 570.2570  | 13368 | 776.4  | 40.6  | 0.0427 |
| 5  | 571.2579  | 13491 | 169.2  | 8.9   | 0.0423 |
| 6  | 584.3635  | 12033 | 98.5   | 5.3   | 0.0486 |
| 7  | 585.3657  | 14491 | 50.8   | 2.7   | 0.0404 |
| 8  | 613.4208  | 13607 | 28.8   | 1.6   | 0.0451 |
| 9  | 657.4492  | 14132 | 33.0   | 2.0   | 0.0465 |
| 10 | 701.4762  | 14823 | 43.4   | 2.9   | 0.0473 |
| 11 | 745.5024  | 14761 | 56.8   | 3.9   | 0.0505 |
| 12 | 746.3047  | 15084 | 78.8   | 5.5   | 0.0495 |
| 13 | 747.3074  | 15315 | 44.8   | 3.1   | 0.0488 |
| 14 | 789.5270  | 13163 | 60.2   | 4.4   | 0.0600 |
| 15 | 790.5301  | 13758 | 26.7   | 1.9   | 0.0575 |
| 16 | 829.5309  | 12165 | 27.2   | 2.1   | 0.0682 |
| 17 | 833.5548  | 13221 | 60.7   | 4.6   | 0.0630 |
| 18 | 834.5572  | 15802 | 35.6   | 2.7   | 0.0528 |
| 19 | 849.5270  | 13027 | 27.1   | 2.1   | 0.0652 |
| 20 | 873.5556  | 12941 | 38.0   | 3.0   | 0.0675 |
| 21 | 877.5776  | 13278 | 61.8   | 4.8   | 0.0661 |
| 22 | 878.5815  | 12831 | 30.5   | 2.4   | 0.0685 |
| 23 | 893.5522  | 12660 | 29.1   | 2.3   | 0.0706 |
| 24 | 917.5804  | 12203 | 44.0   | 3.5   | 0.0752 |
| 25 | 918.5801  | 10754 | 22.2   | 1.8   | 0.0854 |
| 26 | 921.6045  | 12581 | 53.8   | 4.3   | 0.0733 |
| 27 | 922.6087  | 13452 | 30.9   | 2.5   | 0.0686 |
| 28 | 937.5781  | 14737 | 30.2   | 2.5   | 0.0636 |
| 29 | 961.6019  | 16305 | 52.2   | 4.3   | 0.0590 |
| 30 | 962.6062  | 13349 | 23.9   | 2.0   | 0.0727 |
| 31 | 965.6295  | 13772 | 45.5   | 3.8   | 0.0701 |
| 32 | 966.6315  | 12400 | 25.0   | 2.1   | 0.0780 |
| 33 | 981.6055  | 11835 | 24.3   | 2.0   | 0.0829 |
| 34 | 1005.6312 | 14409 | 41.9   | 3.6   | 0.0698 |
| 35 | 1006.6325 | 14671 | 23.3   | 2.0   | 0.0686 |
| 36 | 1009.6564 | 14238 | 35.0   | 3.0   | 0.0709 |
| 37 | 1025.6316 | 11522 | 19.0   | 1.6   | 0.0890 |
| 38 | 1049.6562 | 14118 | 36.0   | 3.1   | 0.0743 |
| 39 | 1053.6825 | 13545 | 26.9   | 2.3   | 0.0778 |
| 40 | 1093.6805 | 12552 | 23.0   | 2.0   | 0.0871 |

  

| # | m/z      | Res.  | S/N | I %   | FWHM   |
|---|----------|-------|-----|-------|--------|
| 1 | 569.2547 | 15205 |     | 100.0 | 0.0374 |
| 2 | 570.2579 | 15232 |     | 40.9  | 0.0374 |
| 3 | 571.2609 | 15259 |     | 8.8   | 0.0374 |
| 4 | 572.2638 | 15286 |     | 1.3   | 0.0374 |

## Triazole-based DHX-hemicyanine fused dye 2j

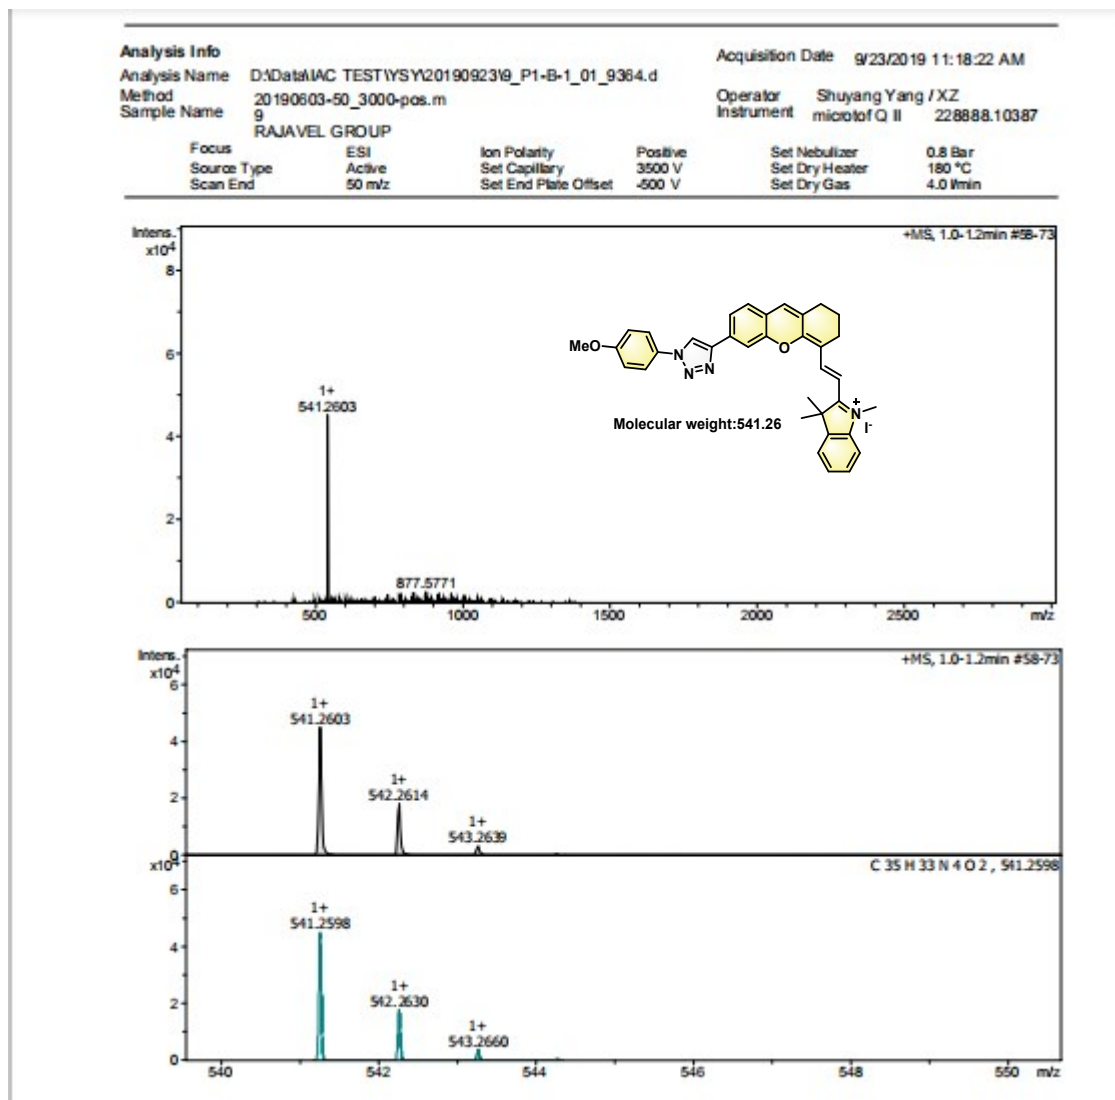



Evaluation Spectra / Validation Formula:

| Meas. m/z  | # | Ion Formula | Score  | m/z        | err [mDa] | err [ppm] | mSigma | rdb | e <sup>-</sup> Conf | N-Rule | Adduct |
|------------|---|-------------|--------|------------|-----------|-----------|--------|-----|---------------------|--------|--------|
| 541.260340 | 1 | C39H33N4O2  | 100.00 | 541.259803 | 0.5       | 1.0       | 6.0    | 215 | even                | ok     | M      |

Calibration Info:

Date: 9/25/2019 10:58:59 AM  
Polarity: Positive  
Calibration spectrum: +MS, 4.6-4.6min #273-276: Scan  
Reference mass list: ESI: Tuning Mix ES-TOF (ESI) (pos)  
Calibration mode: Enhanced Quadratic

| Reference m/z | Resulting m/z | Intensity | Error [ppm] |
|---------------|---------------|-----------|-------------|
| 118.0863      |               |           |             |
| 322.0481      |               |           |             |
| 622.0290      | 622.0290      | 28911     | 0.061       |
| 922.0098      | 922.0098      | 73650     | -0.258      |
| 1221.9906     | 1221.9910     | 101567    | 0.262       |
| 1521.9715     | 1521.9719     | 92334     | 0.262       |
| 1821.9523     | 1821.9511     | 64064     | -0.679      |
| 2121.9332     | 2121.9341     | 43296     | 0.452       |
| 2421.9140     | 2421.9137     | 8242      | -0.099      |
| 2721.8948     |               |           |             |

Standard deviation: 0.565

Mass List:

| #  | m/z       | Res.  | S/N   | I %   | FWHM   |
|----|-----------|-------|-------|-------|--------|
| 1  | 513.2505  | 14316 | 50.6  | 2.2   | 0.0359 |
| 2  | 541.2603  | 15042 | 21123 | 100.0 | 0.0360 |
| 3  | 542.2614  | 14208 | 854.0 | 40.4  | 0.0382 |
| 4  | 543.2639  | 11926 | 150.1 | 7.1   | 0.0456 |
| 5  | 602.3671  | 17981 | 36.3  | 2.0   | 0.0335 |
| 6  | 613.4203  | 12290 | 33.4  | 1.9   | 0.0499 |
| 7  | 657.4483  | 12814 | 37.3  | 2.3   | 0.0513 |
| 8  | 701.4770  | 13266 | 51.7  | 3.5   | 0.0529 |
| 9  | 745.5025  | 13625 | 65.5  | 4.6   | 0.0547 |
| 10 | 746.5046  | 13616 | 28.4  | 2.0   | 0.0548 |
| 11 | 785.5072  | 11755 | 28.2  | 2.1   | 0.0668 |
| 12 | 789.5270  | 13801 | 73.0  | 5.4   | 0.0585 |
| 13 | 790.5284  | 14139 | 35.1  | 2.6   | 0.0559 |
| 14 | 828.5985  | 12876 | 25.9  | 2.0   | 0.0644 |
| 15 | 829.5272  | 12597 | 41.2  | 3.1   | 0.0660 |
| 16 | 833.5554  | 12889 | 75.3  | 5.8   | 0.0647 |
| 17 | 834.5557  | 12774 | 34.1  | 2.6   | 0.0653 |
| 18 | 873.5536  | 13726 | 54.3  | 4.3   | 0.0636 |
| 19 | 874.5531  | 12714 | 27.8  | 2.2   | 0.0688 |
| 20 | 875.5339  | 11447 | 24.4  | 1.9   | 0.0785 |
| 21 | 877.5771  | 13415 | 75.5  | 6.0   | 0.0654 |
| 22 | 878.5822  | 13572 | 37.0  | 2.9   | 0.0647 |
| 23 | 893.5518  | 12960 | 25.0  | 2.0   | 0.0689 |
| 24 | 916.6490  | 13242 | 23.5  | 1.9   | 0.0692 |
| 25 | 917.5793  | 12511 | 59.7  | 4.8   | 0.0733 |
| 26 | 918.5812  | 11782 | 29.9  | 2.4   | 0.0780 |
| 27 | 919.5607  | 11267 | 26.3  | 2.1   | 0.0816 |
| 28 | 921.6030  | 13181 | 62.9  | 5.1   | 0.0699 |
| 29 | 922.6072  | 13256 | 32.5  | 2.6   | 0.0696 |
| 30 | 961.6020  | 14548 | 65.7  | 5.4   | 0.0661 |
| 31 | 962.6057  | 11833 | 30.5  | 2.5   | 0.0814 |
| 32 | 965.6304  | 13206 | 49.0  | 4.0   | 0.0731 |
| 33 | 966.6319  | 14140 | 29.3  | 2.4   | 0.0684 |
| 34 | 1005.6289 | 13904 | 53.1  | 4.5   | 0.0745 |
| 35 | 1006.6288 | 12283 | 28.7  | 2.4   | 0.0820 |
| 36 | 1009.6541 | 13817 | 35.5  | 3.0   | 0.0731 |
| 37 | 1049.6531 | 13370 | 42.9  | 3.7   | 0.0785 |
| 38 | 1050.6582 | 11677 | 22.9  | 1.9   | 0.0900 |
| 39 | 1053.6811 | 13702 | 23.2  | 2.0   | 0.0769 |
| 40 | 1093.6788 | 12570 | 26.6  | 2.3   | 0.0870 |

  

| # | m/z      | Res.  | S/N | I %   | FWHM   |
|---|----------|-------|-----|-------|--------|
| 1 | 541.2598 | 15042 |     | 100.0 | 0.0360 |
| 2 | 542.2630 | 15070 |     | 39.7  | 0.0360 |
| 3 | 543.2660 | 15097 |     | 8.1   | 0.0360 |
| 4 | 544.2689 | 15125 |     | 1.1   | 0.0360 |

## Triazole-based DHX-hemicyanine fused dye 2k

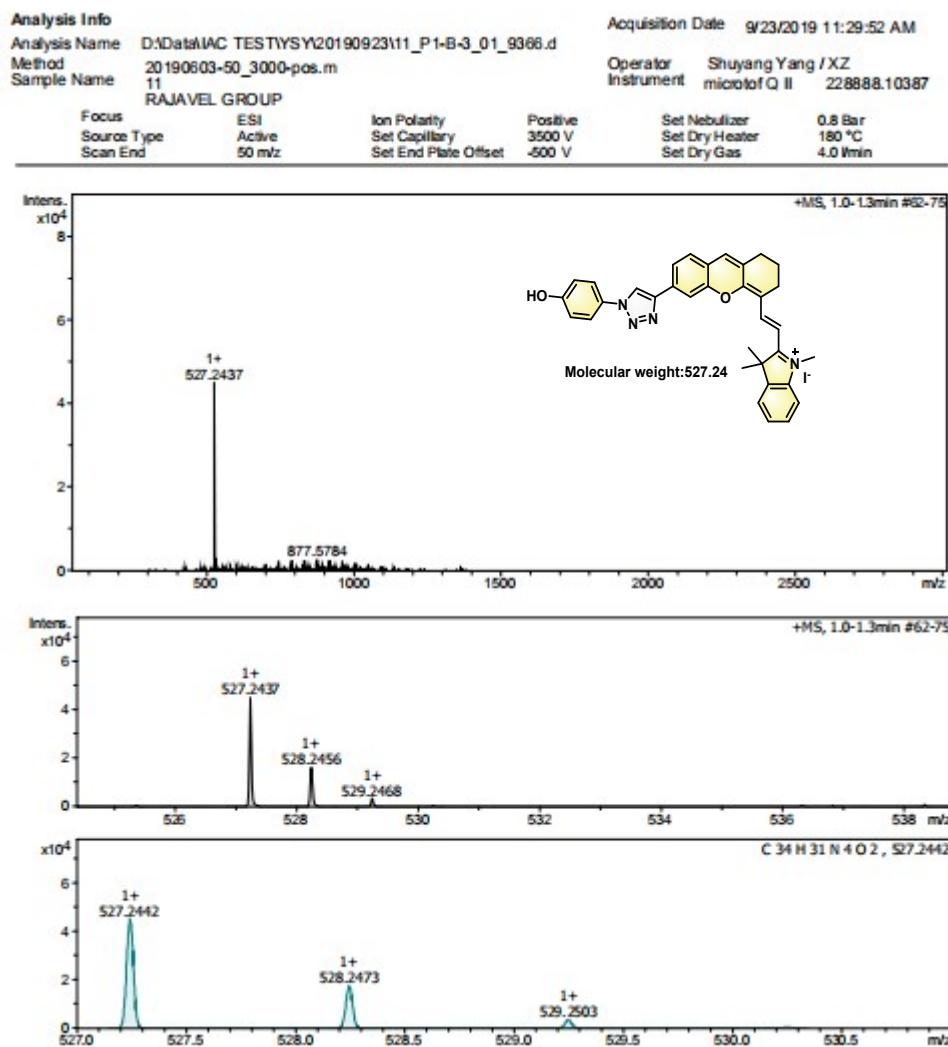

Evaluation Spectra / Validation Formula:

| Meas. m/z  | # | Ion Formula | Score  | m/z        | err [mDa] | err [ppm] | mSigma | rdB  | e <sup>-</sup> Conf | N-Rule | Adduct |
|------------|---|-------------|--------|------------|-----------|-----------|--------|------|---------------------|--------|--------|
| 527.243687 | 1 | C34H31N4O2  | 100.00 | 527.244153 | 0.5       | 0.9       | 11.4   | 21.5 | even                | ok     | M      |

Calibration Info:

Date: 9/25/2019 12:57:21 PM  
Polarity: Positive  
Calibration spectrum: +MS, 4.6-4.6min #274-276: Scan  
Reference mass list: ESI: Tuning Mix ES-TOF (ESI) (pos)  
Calibration mode: Enhanced Quadratic

Mass List:

| Reference m/z | Resulting m/z | Intensity | Error [ppm] | #  | m/z       | Res.  | S/N    | I %   | FWHM   |
|---------------|---------------|-----------|-------------|----|-----------|-------|--------|-------|--------|
| 118.0863      |               |           |             | 1  | 484.2120  | 13432 | 44.4   | 2.0   | 0.0360 |
| 322.0481      |               |           |             | 2  | 527.2437  | 15037 | 1971.7 | 100.0 | 0.0351 |
| 622.0290      | 622.0289      | 28472     | -0.138      | 3  | 528.2466  | 13574 | 717.1  | 36.4  | 0.0389 |
| 922.0098      | 922.0102      | 74152     | 0.477       | 4  | 529.2468  | 13232 | 141.7  | 7.2   | 0.0400 |
| 1221.9906     | 1221.9902     | 101386    | -0.396      | 5  | 613.4198  | 12642 | 33.8   | 2.1   | 0.0485 |
| 1521.9715     | 1521.9715     | 95438     | -0.010      | 6  | 657.4486  | 12663 | 38.6   | 2.6   | 0.0519 |
| 1821.9523     | 1821.9517     | 68975     | -0.325      | 7  | 701.4761  | 13629 | 50.6   | 3.7   | 0.0515 |
| 2121.9332     | 2121.9346     | 43865     | 0.706       | 8  | 745.5027  | 14407 | 67.7   | 5.2   | 0.0517 |
| 2421.9140     | 2421.9132     | 7167      | -0.313      | 9  | 746.5059  | 13884 | 27.9   | 2.1   | 0.0538 |
| 2721.8948     |               |           |             | 10 | 785.5083  | 10264 | 31.5   | 2.5   | 0.0765 |
|               |               |           |             | 11 | 789.5273  | 13319 | 70.0   | 5.6   | 0.0593 |
|               |               |           |             | 12 | 790.5299  | 12548 | 31.3   | 2.5   | 0.0630 |
|               |               |           |             | 13 | 828.5989  | 14370 | 25.4   | 2.1   | 0.0577 |
|               |               |           |             | 14 | 829.5279  | 13077 | 42.5   | 3.5   | 0.0634 |
|               |               |           |             | 15 | 833.5541  | 12147 | 69.3   | 5.7   | 0.0686 |
|               |               |           |             | 16 | 834.5580  | 12899 | 35.3   | 2.9   | 0.0647 |
|               |               |           |             | 17 | 853.5109  | 14717 | 25.7   | 2.2   | 0.0580 |
|               |               |           |             | 18 | 872.5213  | 13894 | 26.0   | 2.2   | 0.0628 |
|               |               |           |             | 19 | 873.5529  | 13032 | 51.5   | 4.4   | 0.0670 |
|               |               |           |             | 20 | 874.5538  | 12731 | 26.4   | 2.2   | 0.0687 |
|               |               |           |             | 21 | 875.5324  | 16046 | 32.9   | 2.8   | 0.0546 |
|               |               |           |             | 22 | 877.5784  | 13237 | 73.6   | 6.3   | 0.0663 |
|               |               |           |             | 23 | 878.5844  | 12940 | 33.0   | 2.8   | 0.0679 |
|               |               |           |             | 24 | 916.6483  | 14575 | 22.3   | 1.9   | 0.0629 |
|               |               |           |             | 25 | 917.5784  | 12153 | 59.1   | 5.2   | 0.0755 |
|               |               |           |             | 26 | 918.5801  | 11817 | 30.0   | 2.6   | 0.0777 |
|               |               |           |             | 27 | 919.5590  | 11369 | 26.6   | 2.3   | 0.0809 |
|               |               |           |             | 28 | 921.6030  | 13916 | 64.5   | 5.6   | 0.0662 |
|               |               |           |             | 29 | 922.6065  | 13479 | 32.8   | 2.9   | 0.0684 |
|               |               |           |             | 30 | 961.6018  | 13179 | 60.7   | 5.4   | 0.0730 |
|               |               |           |             | 31 | 962.6030  | 12615 | 29.8   | 2.7   | 0.0763 |
|               |               |           |             | 32 | 963.5896  | 12883 | 22.7   | 2.0   | 0.0748 |
|               |               |           |             | 33 | 965.6287  | 13413 | 44.9   | 4.0   | 0.0720 |
|               |               |           |             | 34 | 966.6295  | 14317 | 26.3   | 2.3   | 0.0675 |
|               |               |           |             | 35 | 1005.6283 | 13404 | 47.5   | 4.3   | 0.0750 |
|               |               |           |             | 36 | 1006.6311 | 13336 | 28.1   | 2.5   | 0.0755 |
|               |               |           |             | 37 | 1009.6543 | 14158 | 31.9   | 2.9   | 0.0713 |
|               |               |           |             | 38 | 1049.6547 | 12384 | 35.9   | 3.3   | 0.0848 |
|               |               |           |             | 39 | 1050.6571 | 14249 | 23.3   | 2.1   | 0.0737 |
|               |               |           |             | 40 | 1093.6797 | 12978 | 25.5   | 2.3   | 0.0843 |
|               |               |           |             | #  | m/z       | Res.  | S/N    | I %   | FWHM   |
|               |               |           |             | 1  | 527.2442  | 15037 |        | 100.0 | 0.0351 |
|               |               |           |             | 2  | 528.2473  | 15066 |        | 38.6  | 0.0351 |
|               |               |           |             | 3  | 529.2503  | 15094 |        | 7.6   | 0.0351 |
|               |               |           |             | 4  | 530.2538  | 15123 |        | 1.0   | 0.0351 |

Bruker Daltonics ESI - microTOF Q II

MS Lab | IAC - SPST - TJU

Page 2 of 2

## Triazole-based DHX-hemicyanine fused dye 2l

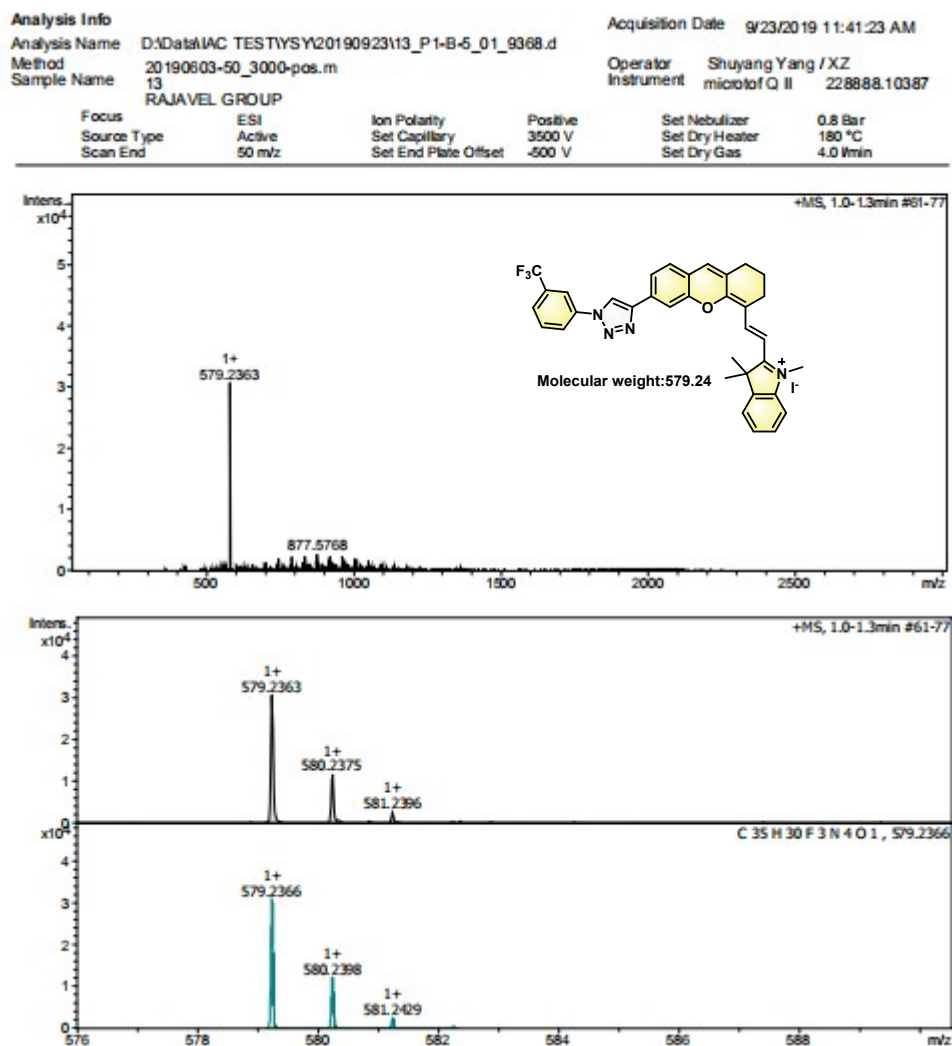

Evaluation Spectra / Validation Formula:

| Meas. m/z  | # | Ion Formula | Score  | m/z        | err [mDa] | err [ppm] | mSigma | rdb  | e <sup>-</sup> Conf | N-Rule | Adduct |
|------------|---|-------------|--------|------------|-----------|-----------|--------|------|---------------------|--------|--------|
| 579.236306 | 1 | C35H30F3N4O | 100.00 | 579.236523 | 0.3       | 0.5       | 9.5    | 21.5 | even                | ok     | M      |

Calibration Info:

Date: 9/25/2019 1:08:04 PM  
Polarity: Positive  
Calibration spectrum: +MS, 4.6-4.7min #272-277: Scan  
Reference mass list: ESI: Tuning Mix ES-TOF (ESI) (pos)  
Calibration mode: Enhanced Quadratic

Mass List:

| Reference m/z | Resulting m/z | Intensity | Error [ppm] |
|---------------|---------------|-----------|-------------|
| 118.0863      |               |           |             |
| 322.0481      |               |           |             |
| 622.0290      | 622.0290      | 25017     | -0.013      |
| 922.0098      | 922.0099      | 64876     | 0.068       |
| 1221.9906     | 1221.9904     | 86483     | -0.168      |
| 1521.9715     | 1521.9719     | 77379     | 0.300       |
| 1821.9523     | 1821.9516     | 57174     | -0.373      |
| 2121.9332     | 2121.9337     | 38688     | 0.259       |
| 2421.9140     | 2421.9138     | 5296      | -0.072      |
| 2721.8948     |               |           |             |

Standard deviation: 0.348

| #  | m/z       | Res.  | S/N    | I %   | FWHM   |
|----|-----------|-------|--------|-------|--------|
| 1  | 430.9061  | 13818 | 63.5   | 2.8   | 0.0312 |
| 2  | 579.2363  | 14627 | 1472.3 | 100.0 | 0.0396 |
| 3  | 580.2375  | 13073 | 556.5  | 37.8  | 0.0444 |
| 4  | 581.2396  | 13735 | 122.1  | 8.3   | 0.0423 |
| 5  | 657.4505  | 11460 | 42.8   | 3.5   | 0.0574 |
| 6  | 701.4753  | 13313 | 52.9   | 4.6   | 0.0527 |
| 7  | 745.5030  | 14215 | 70.8   | 6.5   | 0.0524 |
| 8  | 746.5055  | 14341 | 30.4   | 2.8   | 0.0521 |
| 9  | 785.5060  | 9880  | 28.9   | 2.8   | 0.0795 |
| 10 | 789.5257  | 13334 | 79.9   | 7.7   | 0.0592 |
| 11 | 790.5294  | 13848 | 35.5   | 3.4   | 0.0571 |
| 12 | 829.5263  | 13188 | 46.1   | 4.6   | 0.0629 |
| 13 | 833.5544  | 12536 | 81.5   | 8.2   | 0.0665 |
| 14 | 834.5574  | 12227 | 37.1   | 3.7   | 0.0683 |
| 15 | 849.5251  | 13598 | 33.8   | 3.4   | 0.0625 |
| 16 | 873.5535  | 12194 | 52.5   | 5.4   | 0.0716 |
| 17 | 874.5537  | 11725 | 28.5   | 2.9   | 0.0746 |
| 18 | 875.5333  | 11707 | 27.6   | 2.8   | 0.0748 |
| 19 | 877.5768  | 13652 | 84.9   | 8.8   | 0.0642 |
| 20 | 878.5827  | 13074 | 39.4   | 4.1   | 0.0672 |
| 21 | 893.5530  | 12825 | 35.8   | 3.8   | 0.0697 |
| 22 | 917.5785  | 11766 | 59.0   | 6.3   | 0.0780 |
| 23 | 918.5819  | 11483 | 30.3   | 3.2   | 0.0800 |
| 24 | 919.5612  | 12022 | 27.0   | 2.9   | 0.0765 |
| 25 | 921.6031  | 13735 | 75.0   | 8.0   | 0.0671 |
| 26 | 922.6066  | 15078 | 43.0   | 4.6   | 0.0612 |
| 27 | 937.5773  | 14018 | 34.9   | 3.8   | 0.0669 |
| 28 | 961.6017  | 14667 | 71.6   | 7.8   | 0.0656 |
| 29 | 962.6040  | 12096 | 31.5   | 3.5   | 0.0798 |
| 30 | 965.6299  | 13918 | 59.5   | 6.5   | 0.0694 |
| 31 | 966.6312  | 13906 | 34.7   | 3.8   | 0.0695 |
| 32 | 981.6042  | 14615 | 31.3   | 3.5   | 0.0672 |
| 33 | 1005.6296 | 13084 | 57.2   | 6.5   | 0.0769 |
| 34 | 1006.6319 | 13148 | 33.7   | 3.8   | 0.0766 |
| 35 | 1009.6553 | 13773 | 44.6   | 5.0   | 0.0733 |
| 36 | 1025.6335 | 13420 | 24.4   | 2.8   | 0.0764 |
| 37 | 1049.6536 | 13764 | 49.9   | 5.7   | 0.0763 |
| 38 | 1050.6581 | 12589 | 26.9   | 3.1   | 0.0835 |
| 39 | 1053.6801 | 12475 | 28.2   | 3.3   | 0.0845 |
| 40 | 1093.6794 | 11456 | 30.9   | 3.6   | 0.0955 |

  

| # | m/z      | Res.  | S/N | I %   | FWHM   |
|---|----------|-------|-----|-------|--------|
| 1 | 579.2366 | 14627 |     | 100.0 | 0.0396 |
| 2 | 580.2368 | 14652 |     | 39.7  | 0.0396 |
| 3 | 581.2429 | 14677 |     | 7.9   | 0.0396 |
| 4 | 582.2460 | 14703 |     | 1.0   | 0.0396 |

## Triazole-based DHX-hemicyanine fused dye 2m

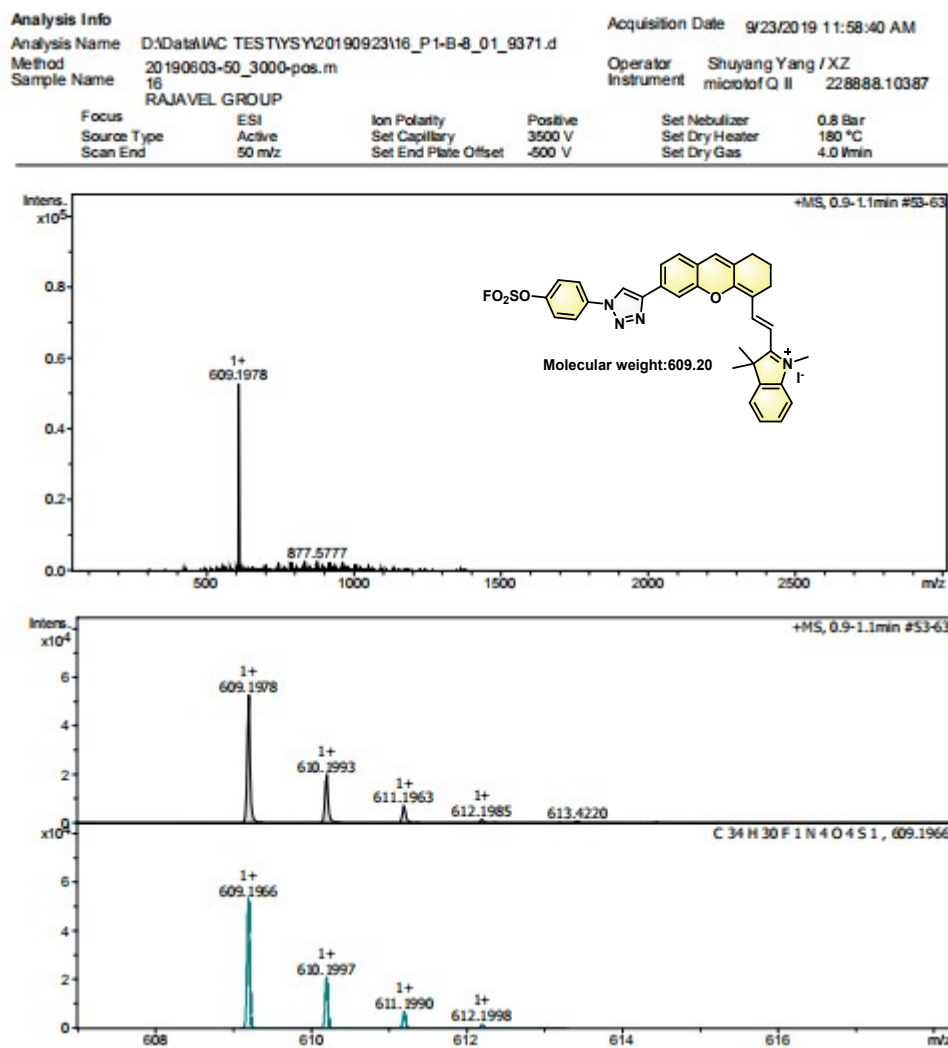



Evaluation Spectra / Validation Formula:

| Meas. m/z  | # | Ion Formula  | Score | m/z        | err [mDa] | err [ppm] | mSigma | rdB  | e <sup>-</sup> Conf | N-Rule | Adduct |
|------------|---|--------------|-------|------------|-----------|-----------|--------|------|---------------------|--------|--------|
| 609.197770 | 1 | C34H30FN4O4S | 68.97 | 609.196631 | -1.1      | -1.9      | 12.2   | 21.5 | even                | ok     | M      |

Calibration Info:

Date: 9/25/2019 4:37:23 PM  
Polarity: Positive  
Calibration spectrum: +MS, 4.6-4.7min #275-277: Scan  
Reference mass list: ESI: Tuning Mix ES-TOF (ESI) (pos)  
Calibration mode: Enhanced Quadratic

Mass List:

| Reference m/z             | Resulting m/z | Intensity | Error [ppm] | #  | m/z       | Res.  | S/N   | I %   | FWHM   |
|---------------------------|---------------|-----------|-------------|----|-----------|-------|-------|-------|--------|
| 118.0863                  |               |           |             | 1  | 553.2945  | 12591 | 54.0  | 2.4   | 0.0439 |
| 322.0481                  |               |           |             | 2  | 581.1894  | 12517 | 37.3  | 1.7   | 0.0464 |
| 622.0290                  | 622.0290      | 27078     | 0.057       | 3  | 602.3661  | 17698 | 35.7  | 1.8   | 0.0340 |
| 922.0098                  | 922.0096      | 68156     | -0.257      | 4  | 609.1978  | 15495 | 20052 | 100.0 | 0.0393 |
| 1221.9906                 | 1221.9910     | 89012     | 0.329       | 5  | 610.1993  | 13469 | 736.9 | 36.8  | 0.0453 |
| 1521.9715                 | 1521.9716     | 89297     | 0.073       | 6  | 611.1963  | 13609 | 255.1 | 12.8  | 0.0449 |
| 1821.9523                 | 1821.9515     | 65495     | -0.466      | 7  | 612.1985  | 12030 | 59.4  | 3.0   | 0.0609 |
| 2121.9332                 | 2121.9339     | 41446     | 0.344       | 8  | 613.4220  | 10421 | 33.8  | 1.7   | 0.0589 |
| 2421.9140                 | 2421.9138     | 8272      | -0.079      | 9  | 657.4503  | 13858 | 43.1  | 2.3   | 0.0474 |
| 2721.8948                 |               |           |             | 10 | 701.4749  | 14547 | 53.8  | 3.2   | 0.0482 |
| Standard deviation: 0.436 |               |           |             | 11 | 745.5017  | 14657 | 69.2  | 4.3   | 0.0509 |
|                           |               |           |             | 12 | 746.5043  | 14395 | 28.4  | 1.8   | 0.0519 |
|                           |               |           |             | 13 | 785.5044  | 11826 | 28.5  | 1.8   | 0.0664 |
|                           |               |           |             | 14 | 789.5264  | 13657 | 72.9  | 4.7   | 0.0578 |
|                           |               |           |             | 15 | 790.5305  | 14463 | 36.0  | 2.3   | 0.0547 |
|                           |               |           |             | 16 | 829.5278  | 12473 | 43.8  | 2.9   | 0.0665 |
|                           |               |           |             | 17 | 833.5532  | 13445 | 77.3  | 5.2   | 0.0620 |
|                           |               |           |             | 18 | 834.5552  | 12737 | 35.6  | 2.4   | 0.0655 |
|                           |               |           |             | 19 | 853.5088  | 13943 | 24.8  | 1.7   | 0.0612 |
|                           |               |           |             | 20 | 872.6226  | 13764 | 25.6  | 1.8   | 0.0634 |
|                           |               |           |             | 21 | 873.5532  | 12422 | 52.5  | 3.6   | 0.0703 |
|                           |               |           |             | 22 | 874.5526  | 11234 | 24.9  | 1.7   | 0.0778 |
|                           |               |           |             | 23 | 875.5340  | 11199 | 27.8  | 1.9   | 0.0782 |
|                           |               |           |             | 24 | 877.5777  | 14037 | 78.2  | 5.4   | 0.0625 |
|                           |               |           |             | 25 | 878.5835  | 13357 | 37.7  | 2.6   | 0.0658 |
|                           |               |           |             | 26 | 893.5541  | 12865 | 24.5  | 1.7   | 0.0695 |
|                           |               |           |             | 27 | 917.5782  | 11816 | 57.8  | 4.1   | 0.0777 |
|                           |               |           |             | 28 | 918.5791  | 8985  | 32.0  | 2.3   | 0.1022 |
|                           |               |           |             | 29 | 919.5587  | 10794 | 24.4  | 1.7   | 0.0852 |
|                           |               |           |             | 30 | 921.6027  | 13071 | 62.5  | 4.4   | 0.0705 |
|                           |               |           |             | 31 | 922.6059  | 17528 | 38.5  | 2.7   | 0.0526 |
|                           |               |           |             | 32 | 961.6022  | 13460 | 60.3  | 4.4   | 0.0714 |
|                           |               |           |             | 33 | 962.6040  | 11448 | 29.9  | 2.2   | 0.0841 |
|                           |               |           |             | 34 | 963.5937  | 12650 | 23.9  | 1.7   | 0.0762 |
|                           |               |           |             | 35 | 965.6304  | 12754 | 41.0  | 3.0   | 0.0757 |
|                           |               |           |             | 36 | 966.6297  | 13776 | 24.4  | 1.8   | 0.0702 |
|                           |               |           |             | 37 | 1005.6285 | 13625 | 53.0  | 3.9   | 0.0738 |
|                           |               |           |             | 38 | 1006.6284 | 13345 | 30.2  | 2.2   | 0.0754 |
|                           |               |           |             | 39 | 1009.6540 | 12734 | 31.0  | 2.3   | 0.0793 |
|                           |               |           |             | 40 | 1049.6548 | 13869 | 39.8  | 3.0   | 0.0757 |
|                           |               |           |             | #  | m/z       | Res.  | S/N   | I %   | FWHM   |
|                           |               |           |             | 1  | 609.1966  | 15495 |       | 100.0 | 0.0393 |
|                           |               |           |             | 2  | 610.1997  | 15520 |       | 39.5  | 0.0393 |
|                           |               |           |             | 3  | 611.1990  | 15546 |       | 12.9  | 0.0393 |
|                           |               |           |             | 4  | 612.1998  | 15571 |       | 3.0   | 0.0393 |

## Triazole-based DHX-hemicyanine fused dye 2n

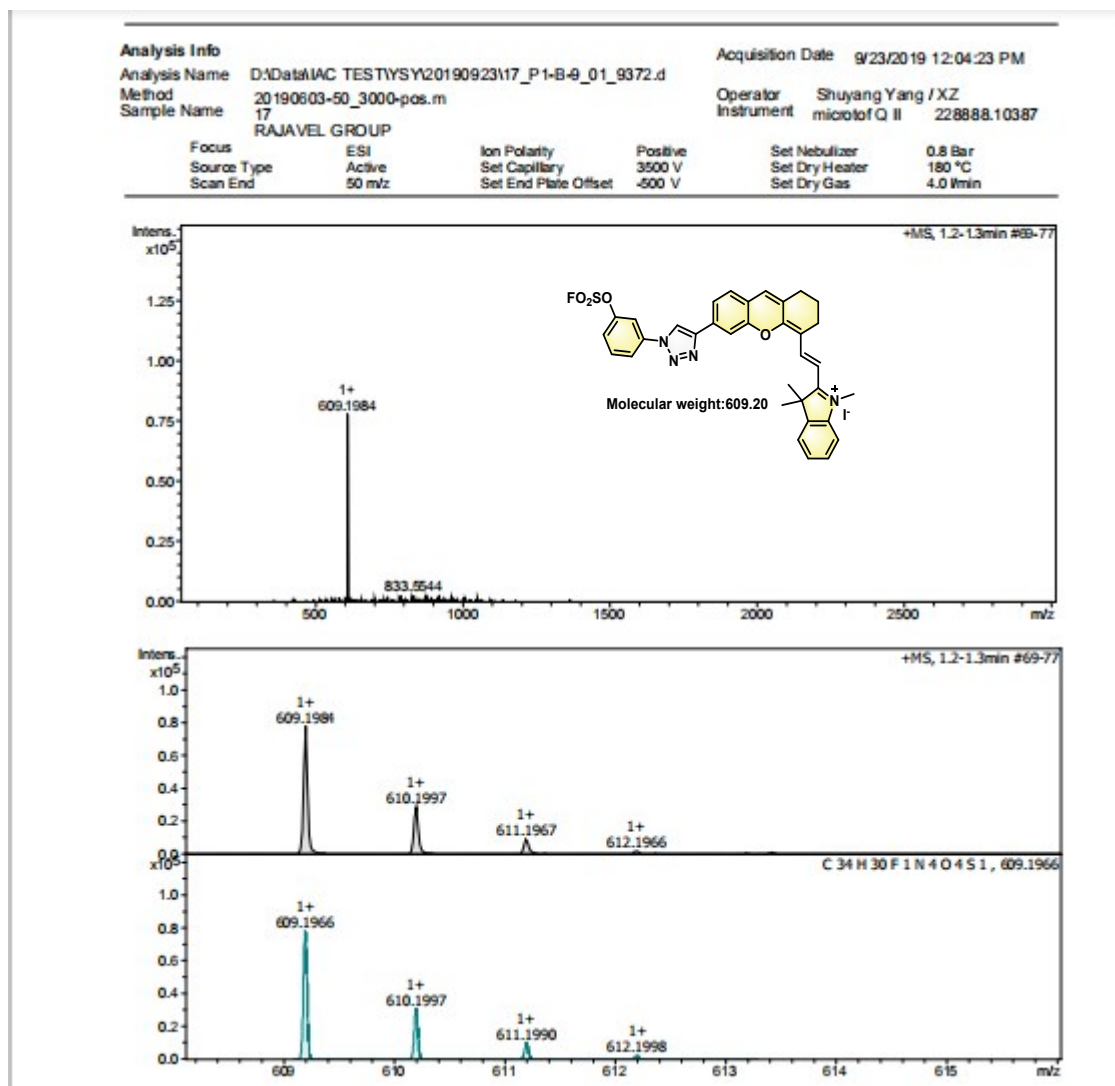



Evaluation Spectra / Validation Formula:

| Meas. m/z  | # | Ion Formula  | Score | m/z        | err [mDa] | err [ppm] | mSigma | rdb  | e <sup>-</sup> Conf | N-Rule | Adduct |
|------------|---|--------------|-------|------------|-----------|-----------|--------|------|---------------------|--------|--------|
| 609.198365 | 1 | C34H30FN4O4S | 51.48 | 609.196631 | -1.7      | -2.8      | 13.2   | 21.5 | even                | ok     | M      |

Calibration Info:

Date: 9/25/2019 4:41:44 PM  
Polarity: Positive  
Calibration spectrum: +MS, 4.6-4.6min #273-276: Scan  
Reference mass list: ESI: Tuning Mix ES-TOF (ESI) (pos)  
Calibration mode: Enhanced Quadratic

| Reference m/z | Resulting m/z | Intensity | Error [ppm] |
|---------------|---------------|-----------|-------------|
| 118.0863      |               |           |             |
| 322.0481      |               |           |             |
| 622.0290      | 622.0289      | 27286     | -0.032      |
| 922.0098      | 922.0099      | 73568     | 0.097       |
| 1221.9906     | 1221.9905     | 96687     | -0.085      |
| 1521.9715     | 1521.9717     | 89604     | 0.160       |
| 1821.9523     | 1821.9515     | 63100     | -0.468      |
| 2121.9332     | 2121.9342     | 40297     | 0.503       |
| 2421.9140     | 2421.9136     | 6747      | -0.175      |
| 2721.8948     |               |           |             |

Standard deviation: 0.445

Mass List:

| #  | m/z       | Res.  | S/N    | I%    | FWHM   |
|----|-----------|-------|--------|-------|--------|
| 1  | 581.1879  | 13100 | 64.7   | 2.3   | 0.0144 |
| 2  | 609.1984  | 16292 | 2657.0 | 100.0 | 0.0374 |
| 3  | 610.1997  | 14264 | 977.0  | 36.9  | 0.0428 |
| 4  | 611.1967  | 12868 | 306.9  | 11.7  | 0.0475 |
| 5  | 612.1966  | 11232 | 66.3   | 2.5   | 0.0545 |
| 6  | 613.4209  | 12255 | 35.4   | 1.3   | 0.0501 |
| 7  | 657.4507  | 12947 | 40.0   | 1.6   | 0.0508 |
| 8  | 701.4759  | 13747 | 48.6   | 2.1   | 0.0510 |
| 9  | 735.0894  | 13218 | 31.8   | 1.4   | 0.0556 |
| 10 | 745.5026  | 14826 | 59.2   | 2.7   | 0.0503 |
| 11 | 746.5042  | 15901 | 29.7   | 1.4   | 0.0482 |
| 12 | 785.5072  | 12545 | 28.6   | 1.4   | 0.0626 |
| 13 | 789.5269  | 13040 | 67.6   | 3.2   | 0.0605 |
| 14 | 790.5295  | 13277 | 29.6   | 1.4   | 0.0595 |
| 15 | 829.5292  | 12359 | 39.0   | 1.9   | 0.0671 |
| 16 | 833.5544  | 14046 | 71.2   | 3.5   | 0.0593 |
| 17 | 834.5569  | 12666 | 34.3   | 1.7   | 0.0659 |
| 18 | 853.5124  | 12952 | 24.3   | 1.2   | 0.0659 |
| 19 | 873.5502  | 13699 | 52.8   | 2.7   | 0.0638 |
| 20 | 874.5543  | 12371 | 24.1   | 1.2   | 0.0707 |
| 21 | 875.5314  | 12094 | 28.7   | 1.5   | 0.0724 |
| 22 | 877.5770  | 12866 | 69.0   | 3.5   | 0.0682 |
| 23 | 878.5624  | 14014 | 35.1   | 1.8   | 0.0627 |
| 24 | 916.6482  | 14736 | 23.0   | 1.2   | 0.0622 |
| 25 | 917.5780  | 12655 | 59.2   | 3.1   | 0.0725 |
| 26 | 918.5803  | 11668 | 27.6   | 1.4   | 0.0787 |
| 27 | 919.5595  | 11667 | 25.8   | 1.3   | 0.0788 |
| 28 | 921.6040  | 12727 | 52.8   | 2.8   | 0.0724 |
| 29 | 922.6083  | 13837 | 30.7   | 1.6   | 0.0667 |
| 30 | 937.5782  | 15225 | 21.9   | 1.2   | 0.0616 |
| 31 | 961.6018  | 13407 | 55.4   | 2.9   | 0.0717 |
| 32 | 962.6038  | 11359 | 25.8   | 1.4   | 0.0847 |
| 33 | 963.5935  | 13004 | 23.3   | 1.2   | 0.0741 |
| 34 | 965.6300  | 13299 | 39.3   | 2.1   | 0.0726 |
| 35 | 966.6284  | 14409 | 23.9   | 1.3   | 0.0671 |
| 36 | 1005.6278 | 13219 | 44.5   | 2.4   | 0.0761 |
| 37 | 1006.6297 | 13431 | 25.1   | 1.3   | 0.0749 |
| 38 | 1009.6534 | 13104 | 27.6   | 1.5   | 0.0771 |
| 39 | 1049.6522 | 13110 | 34.9   | 1.9   | 0.0801 |
| 40 | 1053.6783 | 14638 | 21.1   | 1.2   | 0.0720 |

| # | m/z      | Res.  | S/N | I%    | FWHM   |
|---|----------|-------|-----|-------|--------|
| 1 | 609.1966 | 16292 |     | 100.0 | 0.0374 |
| 2 | 610.1997 | 16319 |     | 39.5  | 0.0374 |
| 3 | 611.1960 | 16345 |     | 12.9  | 0.0374 |
| 4 | 612.1968 | 16372 |     | 3.0   | 0.0374 |

## Triazole-based DHX-hemicyanine fused dye 2o

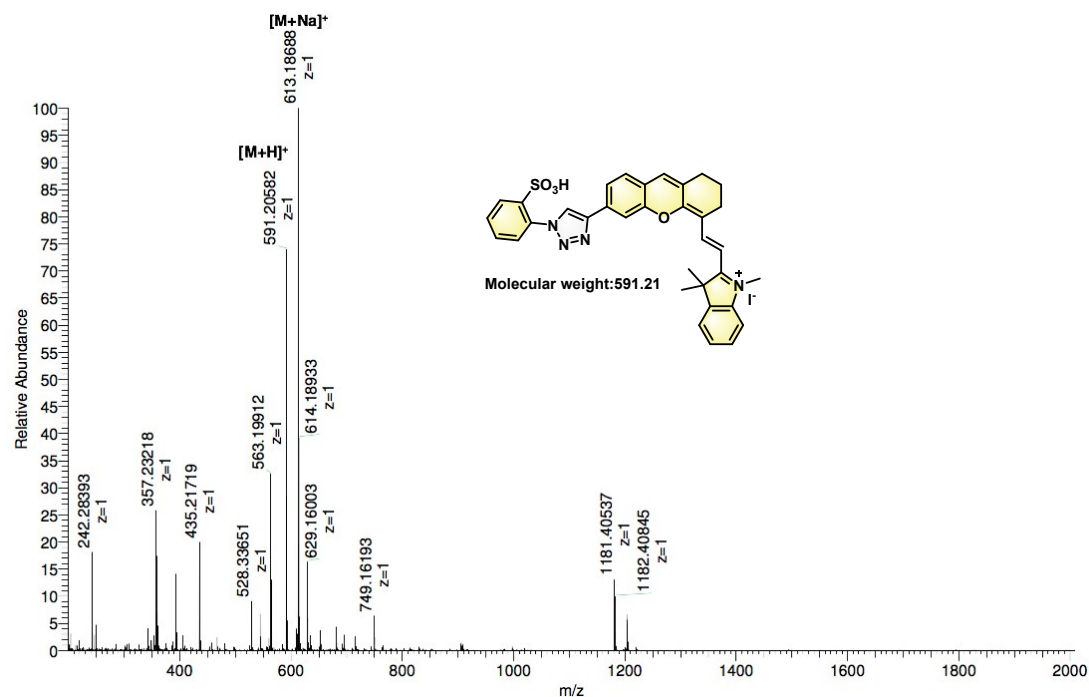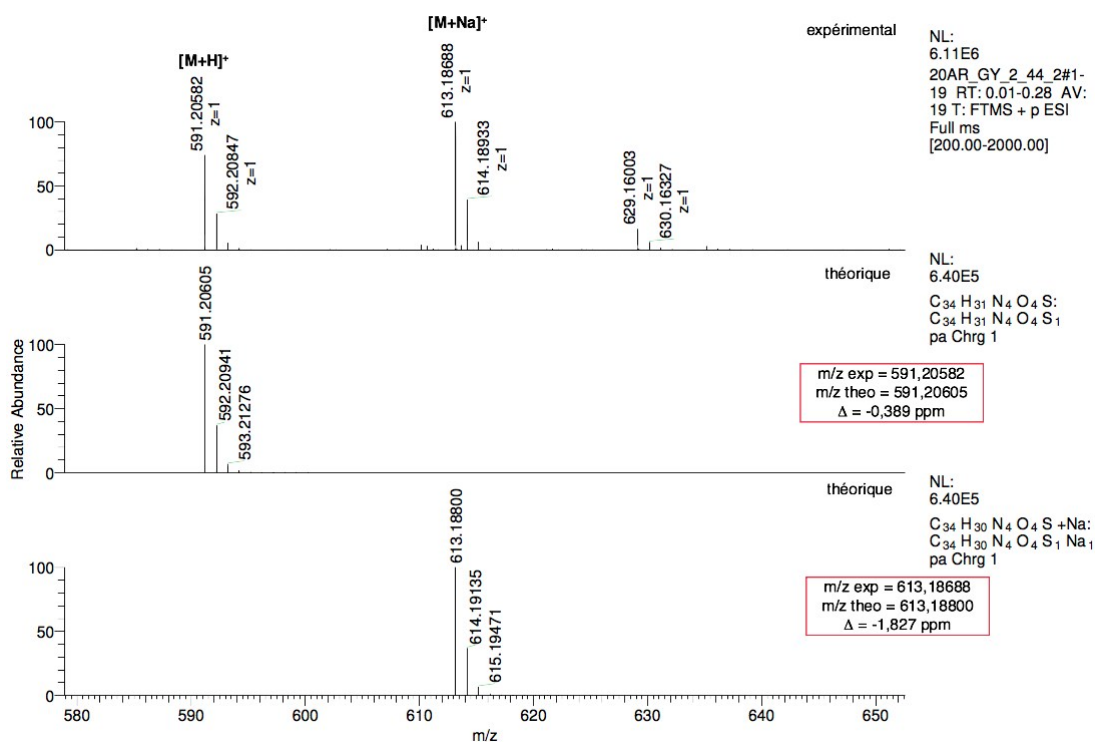

Supplement: d0nj01724h1.pdf [file d0nj01724h1.pdf]
